# Supplementary material for: Rational optimization of siRNA to ensure strand bias in the interaction with the RNA-induced silencing complex
Source: Royal Society of Chemistry journal article supplement (doi:10.1039/d3cc01143g), 2023-01-01
Supplement: d3cc01143g1.pdf [file d3cc01143g1.pdf]

## Rational optimization of siRNA to ensure strand bias in the interaction with the RNA-induced silencing complex

Dhrubajyoti Datta,<sup>a</sup> Christopher S. Theile,<sup>a</sup> Kelly Wassarman,<sup>a</sup> June Qin, Tim Racie<sup>a</sup>, Karyn Schmidt,<sup>a</sup> Yongfeng Jiang,<sup>a</sup> Rachel Sigel,<sup>a</sup> Maja M. Janas,<sup>a</sup> Martin Egli<sup>b</sup> and Muthiah Manoharan\*<sup>a</sup>

<sup>a</sup>*Alnylam Pharmaceuticals, 675 West Kendall Street, Cambridge, Massachusetts 02142, USA*

<sup>b</sup>*Department of Biochemistry, School of Medicine, Vanderbilt University, Nashville, Tennessee 37232, USA*

### *Supporting Information*

| <b>Contents</b>                                                             | <b>Page No.</b> |
|-----------------------------------------------------------------------------|-----------------|
| Synthesis of building blocks.....                                           | 1               |
| <sup>1</sup> H, <sup>13</sup> C and <sup>31</sup> P NMR data.....           | 10              |
| Synthesis of oligonucleotides.....                                          | 40              |
| HPLC chromatograms of oligonucleotides.....                                 | 42              |
| Treatment of mice and analysis of <i>ApoB</i> .....                         | 61              |
| On- and off-target activity determination in luciferase reporter assay..... | 61              |
| <i>In vitro ApoB</i> assay.....                                             | 62              |
| <i>In vitro Ago2</i> binding assay.....                                     | 64              |
| Modelling Studies.....                                                      | 65              |
| References.....                                                             | 66              |

## Synthesis of building blocks

**General conditions:** TLC was performed on Merck silica gel 60 plates coated with F254. Compounds were visualized under UV light (254 nm) or after spraying with the p-anisaldehyde staining solution followed by heating. Flash column chromatography was performed using a Teledyne ISCO Combi Flash system with pre-packed RediSep Teledyne ISCO silica gel cartridges and Prep-Achiral supercritical fluid chromatography. All moisture-sensitive reactions were carried out under anhydrous conditions using dry glassware, anhydrous solvents, and argon atmosphere. All commercially available reagents and solvents were purchased from Sigma-Aldrich unless otherwise stated and were used as received. ESI-MS spectra were recorded on a Waters QToF Premier instrument using the direct flow injection mode.  $^1\text{H}$  NMR spectra were recorded at 300, 400, and 500 MHz.  $^{13}\text{C}$  NMR spectra were recorded at 75, 101, and 126 MHz.  $^{31}\text{P}$  NMR spectra were recorded at 162 and 202 MHz. Chemical shifts are given in ppm referenced to the solvent residual peak (DMSO- $d_6$  –  $^1\text{H}$ :  $\delta$  at 2.50 ppm and  $^{13}\text{C}$   $\delta$  at 39.5 ppm;  $\text{CDCl}_3$  –  $^1\text{H}$ :  $\delta$  at 7.26 ppm and  $^{13}\text{C}$   $\delta$  at 77.16 ppm). Coupling constants are given in Hertz. Signal splitting patterns are described as singlet (s), doublet (d), triplet (t), septet (sept), broad signal (brs), or multiplet (m).

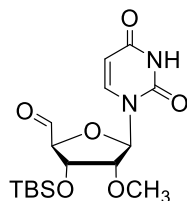

**(2S,5R)-3-[tert-butyl(dimethyl)silyloxy]-5-(2,4-dioxypyrimidin-1-yl)-4-methoxy-tetrahydrofuran-2-carbaldehyde (2):** The aldehyde was synthesized following the literature procedure.<sup>1</sup> 2-Iodoxybenzoic acid (2.82 g, 10.07 mmol) was added to **1**<sup>2</sup> (1.25 g, 3.36 mmol) in anhydrous acetonitrile (30 mL) under argon atmosphere. The mixture was refluxed at 81 °C for 0.75 h and then cooled. The reaction mixture was filtered through a celite bed, and the solid residue was washed with ethyl acetate (EtOAc) (50 mL). The combined filtrate was evaporated at 30 °C. The gummy residue thus obtained was further co-evaporated with toluene (30 mL) to afford **2** (1.15 g, 93% yield) as an amorphous white solid that was used in the next step without further purification. The product was stored at -20 °C. <sup>1</sup>H NMR (500 MHz, CDCl<sub>3</sub>) δ 9.79 (s, 1H), 9.75 (s, 1H), 7.68 (d, *J* = 8.1 Hz, 1H), 5.88 – 5.72 (m, 2H), 4.55 (d, *J* = 4.5 Hz, 1H), 4.43 (t, *J* = 4.5 Hz, 1H), 3.96 (t, *J* = 4.7 Hz, 1H), 3.47 (s, 3H), 0.93 (s, 9H), 0.14 (d, *J* = 7.7 Hz, 6H) ppm.

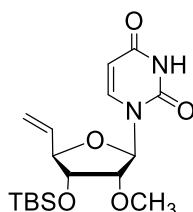

**1-[(2R,5R)-4-[tert-butyl(dimethyl)silyloxy]-3-methoxy-5-vinyl-tetrahydrofuran-2-yl]pyrimidine-2,4-dione (3):** Compound **3** was obtained following the literature procedure.<sup>1</sup> To a well-stirred suspension of methyltriphenylphosphonium bromide (7.08 g, 19.43 mmol) in tetrahydrofuran (THF) (30 mL) was added potassium-tert-butoxide (2.23 g, 19.43 mmol). The bright yellow suspension was stirred at 0 °C for 10 min and then for 1 h. The crude aldehyde **2** (2.4 g, 6.48 mmol) was dissolved in THF (20 mL), transferred into a dropping funnel, and slowly added to the solution of ylide at 0 °C. The mixture was vigorously stirred at 0 °C for 10 min and then at 22 °C for 16 h. The mixture was diluted with DCM (30 mL), and the organic layer was washed with saturated NH<sub>4</sub>Cl solution (30 mL). The organic layer was dried over anhydrous Na<sub>2</sub>SO<sub>4</sub> and filtered, and the filtrate was evaporated to dryness. The crude compound was purified by column chromatography (gradient: 0-50% EtOAc in hexanes) to afford **3** (1.93 g, 81% yield) as a white foam. <sup>1</sup>H NMR (400 MHz, CDCl<sub>3</sub>) δ 9.26 (s, 1H), 7.38 (d, *J* = 8.1 Hz, 1H), 5.90 (ddd, *J* = 17.1, 10.5, 6.5 Hz, 1H), 5.83 (d, *J* = 2.0 Hz, 1H), 5.77 (dd, *J* = 8.1, 1.9 Hz, 1H), 5.45 (dt, *J* = 17.1, 1.3 Hz, 1H), 5.35 (dt, *J* = 10.5, 1.3 Hz, 1H), 4.42 (tt, *J* = 6.5, 1.3 Hz, 1H), 3.91 (dd, *J* = 7.7, 5.0 Hz, 1H), 3.72 (dd, *J* = 5.0, 2.1 Hz, 1H), 3.56 (s, 3H), 0.90 (s, 9H), 0.09 (d, *J* = 7.2 Hz, 6H) ppm. <sup>13</sup>C (101 MHz, CDCl<sub>3</sub>) δ 163.4, 150.0, 139.8, 134.6, 119.3, 102.6, 89.8, 8.1, 83.6, 74.6, 58.8, 25.8, 18.3, -4.5, -4.5 ppm. HRMS calc. for C<sub>17</sub>H<sub>29</sub>N<sub>2</sub>O<sub>5</sub>Si [M + H]<sup>+</sup> 369.1846, found 369.1846.

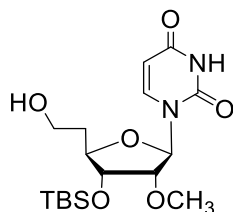

**1-[(2R,5R)-4-[tert-butyl(dimethyl)silyl]oxy-5-(2-hydroxyethyl)-3-methoxy-tetrahydrofuran-2-yl]pyrimidine-2,4-dione (4):** Conditions used for optimization are shown in Table S1. Hydroboration of **3** was done following the literature procedure.<sup>3</sup> To a solution of **3** (2.0 g, 5.43 mmol) in THF (25 mL) was added 9-borabicyclo[3.3.1]nonane (3.97 g, 32.56 mmol, 4.44 mL) at 0 °C. The mixture was allowed to warm and stirred at 22 °C for 20 h. The reaction mixture was cooled, and methanol (20 mL) was added dropwise. When the gas evolution ceased, water (30 mL) was added followed by sodium perborate tetrahydrate (20.88 g, 130.26 mmol). The resulting mixture was vigorously stirred for 30 h at 0 °C and then filtered. The filtrate was washed with EtOAc (50 mL). The organic layer was further washed with brine (40 mL), dried over anhydrous Na<sub>2</sub>SO<sub>4</sub>, and filtered. The filtrate was evaporated to dryness. The crude residue thus obtained was purified by column chromatography (gradient: 20-75% EtOAc in hexanes) to afford **4** (1.57 g, 75% yield) as a white solid. <sup>1</sup>H NMR (600 MHz, DMSO-*d*<sub>6</sub>) δ 11.38 (s, 1H), 7.62 (d, *J* = 8.0 Hz, 1H), 5.77 (d, *J* = 4.5 Hz, 1H), 5.66 (d, *J* = 8.0 Hz, 1H), 4.56 (t, *J* = 5.0 Hz, 1H), 4.12 (t, *J* = 5.2 Hz, 1H), 3.88 (dt, *J* = 7.0, 4.4 Hz, 2H), 3.56 – 3.42 (m, 2H), 3.32 (s, 3H), 1.80 (dtd, *J* = 14.3, 7.4, 4.6 Hz, 1H), 1.71 (ddt, *J* = 14.0, 8.0, 5.5 Hz, 1H), 0.88 (s, 9H), 0.09 (d, *J* = 3.6 Hz, 6H) ppm. <sup>13</sup>C NMR (151 MHz, DMSO-*d*<sub>6</sub>) δ 163.1, 150.4, 141.0, 102.2, 87.1, 81.5, 80.7, 73.4, 57.5, 57.4, 35.9, 25.7, 17.8, -4.7, -4.9 ppm. HRMS calc. for C<sub>17</sub>H<sub>30</sub>N<sub>2</sub>O<sub>6</sub>SiNa [M + Na]<sup>+</sup> 409.1771, found 409.1767.

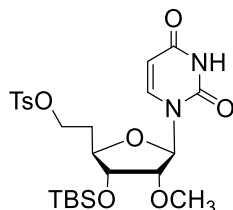

**2-[(2R,5R)-3-[tert-butyl(dimethyl)silyl]oxy-5-(2,4-dioxypyrimidin-1-yl)-4-methoxy-tetrahydrofuran-2-yl]ethyl-4-methylbenzenesulfonate (5):** To a clear solution of **4** (1.00 g, 2.59 mmol) in dry DCM (30 mL) and pyridine (620.15 mg, 7.76 mmol, 0.63 mL) was added 4-(dimethylamino)pyridine (638.55 mg, 5.17 mmol), and reaction mixture was cooled to 0 °C. To the resulting solution, *p*-toluenesulfonyl chloride (747.36 mg, 3.88 mmol) was added in single portion, and the reaction mixture was stirred for 12 h at 22 °C. The reaction mixture was diluted with DCM (20 mL) and washed with NaHCO<sub>3</sub> solution (30 mL). The DCM layer was dried over anhydrous Na<sub>2</sub>SO<sub>4</sub> and filtered, and the filtrate was evaporated to dryness. The crude mass thus obtained was purified by column chromatography (gradient: 0-60% EtOAc in hexanes) to afford **5** (0.92 g, 66% yield) as a white solid. <sup>1</sup>H NMR (600 MHz, CDCl<sub>3</sub>) δ 8.61 (s, 1H), 7.81 – 7.76 (m, 2H), 7.37 – 7.32 (m, 2H), 7.23 (d, *J* = 8.1 Hz, 1H), 5.76 (dd, *J* = 8.1, 1.8 Hz, 1H), 5.64 (d, *J* = 2.6 Hz, 1H), 4.23 (ddd, *J* = 10.1, 7.1, 5.3 Hz, 1H), 4.13 (ddd, *J* = 10.1, 7.7, 6.4 Hz, 1H), 3.94 (ddd, *J* = 9.4, 7.3, 3.3 Hz, 1H), 3.86 (dd, *J* = 7.3, 5.3 Hz, 1H), 3.73 (dd, *J* = 5.3, 2.6 Hz, 1H), 3.48 (s, 3H), 2.45 (s, 3H), 2.14 (dtd, *J* = 14.6, 7.4, 3.4 Hz, 1H), 1.90 (dddd, *J* = 14.5, 9.4, 6.5, 5.4 Hz, 1H), 0.89 (s, 9H), 0.09 (s, 3H), 0.07 (s, 3H) ppm. <sup>13</sup>C NMR (151 MHz, CDCl<sub>3</sub>) δ 162.9, 149.7, 145.1, 140.3, 132.9, 130.0, 128.1, 102.8, 90.4, 83.0, 79.5, 74.4, 67.0, 58.6, 32.5, 25.8, 21.8, 18.2, -4.4, -4.7 ppm. HRMS calc. for C<sub>24</sub>H<sub>37</sub>N<sub>2</sub>O<sub>8</sub>SSi [M + H]<sup>+</sup> 541.2040, found 541.2045.

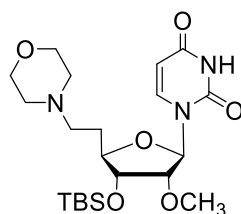

**1-[(2R,5R)-4-[tert-butyl(dimethyl)silyloxy]-3-methoxy-5-(2-morpholinoethyl)tetrahydrofuran-2-yl]pyrimidine-2,4-dione (6):** Morpholine (4 mL) was added to **5** (0.5 g, 0.924 mmol), and the clear solution was heated at 70 °C for 8 h. All the volatile matters were evaporated, and the residue was purified by column chromatography (gradient: 0-5% MeOH in DCM) to afford **6** (0.35 g, 83% yield) as a hygroscopic solid. <sup>1</sup>H NMR (500 MHz, CDCl<sub>3</sub>) δ 9.05 (s, 1H), 7.33 (d, *J* = 8.1 Hz, 1H), 5.78 (d, *J* = 2.4 Hz, 1H), 5.76 (d, *J* = 8.1 Hz, 1H), 4.03 (ddd, *J* = 9.0, 7.4, 3.8 Hz, 1H), 3.84 (dd, *J* = 7.4, 5.2 Hz, 1H), 3.75 – 3.63 (m, 5H), 3.52 (s, 3H), 2.67 – 2.34 (m, 6H), 2.05 – 1.88 (m, 1H), 1.79 – 1.64 (m, 1H), 0.91 (s, 9H), 0.10 (d, *J* = 5.0 Hz, 6H) ppm. <sup>13</sup>C NMR (126 MHz, CDCl<sub>3</sub>) δ 163.2, 149.9, 139.9, 102.6, 89.6, 83.6, 81.5, 74.7, 67.0, 58.5, 55.4, 53.8, 30.4, 25.8, 18.3, -4.3, -4.6 ppm. HRMS calc. for C<sub>21</sub>H<sub>38</sub>N<sub>3</sub>O<sub>6</sub>Si [M + H]<sup>+</sup> 456.2530, found 456.2529.

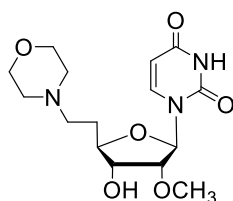

**1-[(2R,5R)-4-hydroxy-3-methoxy-5-(2-morpholinoethyl)tetrahydrofuran-2-yl]pyrimidine-2,4-dione (7):** To a clear solution of **6** (0.6 g, 1.32 mmol) in THF (15 mL) at 22 °C, tetrabutylammonium fluoride, 1 M in THF (1.71 mmol, 1.71 mL), was added slowly in a single portion and then stirred for 3 h. All the volatile matters were removed under high vacuum, and the residue thus obtained was purified by column chromatography (gradient: 0-10% MeOH in DCM) to afford **7** (0.37 g, 82% yield) as a white solid. <sup>1</sup>H NMR (500 MHz, DMSO-*d*<sub>6</sub>) δ 11.50 – 11.08 (m, 1H), 7.59 (d, *J* = 8.1 Hz, 1H), 5.77 (d, *J* = 4.3 Hz, 1H), 5.65 (dd, *J* = 8.1, 1.9 Hz, 1H), 5.37 – 5.18 (m, 1H), 3.90 (s, 1H), 3.84 (dd, *J* = 5.3, 4.3 Hz, 1H), 3.79 (dt, *J* = 8.0, 5.4 Hz, 1H), 3.57 (t, *J* = 4.7 Hz, 4H), 3.36 (s, 3H), 2.40 – 2.26 (m, 6H), 1.87 (dtd, *J* = 13.1, 7.8, 5.2 Hz, 1H), 1.71 (dtd, *J* = 13.5, 7.7, 5.5 Hz, 1H) ppm. <sup>13</sup>C NMR (126 MHz, DMSO-*d*<sub>6</sub>) δ 163.0, 150.4, 140.8, 102.1, 87.0, 82.0, 81.7, 72.1, 66.1, 57.6, 54.6, 53.2, 29.7 ppm. HRMS calc. for C<sub>15</sub>H<sub>24</sub>N<sub>3</sub>O<sub>6</sub> [M + H]<sup>+</sup> 342.1665, found 342.1660.

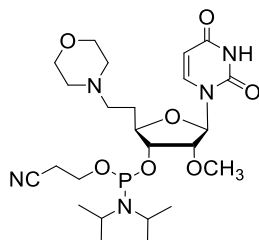

**3-[(diisopropylamino)-[(2R,5R)-5-(2,4-dioxypyrimidin-1-yl)-4-methoxy-2-(2-morpholinoethyl)tetrahydrofuran-3-yl]oxy-phosphanyl]propanenitrile (8):** To a clear solution of **7** (0.34 g, 1.0 mmol) in DCM (20 mL) was added DIPEA (650.13 mg, 4.98 mmol, 0.88 mL) and

N-methylimidazole (123.90 mg, 1.49 mmol, 0.12 mL) in single portions. To the resulting mixture was added 2-cyanoethyl-*N,N*-diisopropylchlorophosphoramidite (248.15 mg, 996.02  $\mu\text{mol}$ , 0.23 mL) at 22 °C. After stirring for 1 h, when TLC showed completion of reaction, the mixture was diluted with DCM (20 mL) and quenched by adding  $\text{NaHCO}_3$  solution (20 mL). The organic layer was separated, dried over anhydrous  $\text{Na}_2\text{SO}_4$ , and filtered. The filtrate was evaporated to dryness. The crude material was triturated with 1:1 hexanes in ether. The precipitate thus obtained was purified by column chromatography (gradient: 0-3% MeOH in DCM containing 3% TEA) to afford **8** (0.36 g, 69% yield) as a yellowish-white hygroscopic foam.  $^1\text{H}$  NMR (400 MHz,  $\text{CD}_3\text{CN}$ )  $\delta$  8.84 (s, 1H), 7.40 (dd,  $J = 8.1, 1.0$  Hz, 1H), 7.14 – 6.73 (m, 1H), 5.83 (dd,  $J = 4.5, 1.1$  Hz, 1H), 5.63 (d,  $J = 8.1$  Hz, 1H), 4.29 – 3.97 (m, 2H), 3.91 – 3.75 (m, 2H), 3.69 – 3.55 (m, 6H), 3.43 (d,  $J = 14.2$  Hz, 3H), 2.83 – 2.60 (m, 2H), 2.49 – 2.26 (m, 4H), 1.94 (dt,  $J = 4.9, 2.5$  Hz, 1H), 1.76 (ddd,  $J = 9.9, 6.3, 2.2$  Hz, 1H), 1.29 – 0.97 (m, 13H) ppm.  $^{13}\text{C}$  NMR (126 MHz,  $\text{CD}_3\text{CN}$ )  $\delta$  164.1, 151.5, 151.5, 141.1, 138.9, 129.5, 121.3, 119.6, 103.2, 103.1, 88.9, 88.5, 83.2, 83.2, 82.8, 82.7, 82.4, 82.3, 82.0, 81.9, 75.3, 75.2, 75.1, 74.9, 74.5, 67.5, 67.5, 59.8, 59.6, 59.2, 59.0, 58.9, 58.8, 58.7, 58.7, 58.0, 55.6, 54.6, 54.6, 47.3, 46.6, 46.4, 46.3, 46.0, 46.0, 45.6, 44.2, 44.1, 44.1, 44.0, 33.6, 30.9, 25.0, 24.9, 24.9, 24.9, 23.6, 23.2, 23.2, 23.1, 23.1, 22.6, 21.1, 21.0, 21.0, 20.4, 20.4 ppm.  $^{31}\text{P}$  NMR (202 MHz,  $\text{CD}_3\text{CN}$ )  $\delta$  150.84, 150.78 ppm. HRMS calc. for  $\text{C}_{24}\text{H}_{41}\text{N}_5\text{O}_7\text{P}$   $[\text{M} + \text{H}]^+$  542.2744, found 542.2744.

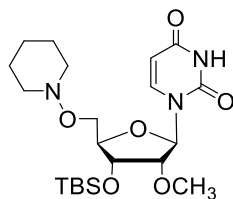

**1-[(2*R*,5*R*)-4-[*tert*-butyl(dimethyl)silyl]oxy-3-methoxy-5-(1-piperidyloxymethyl)tetrahydrofuran-2-yl]pyrimidine-2,4-dione (10):** To a clear solution of **9**<sup>4</sup> (0.4 g, 1.03 mmol) in acetic acid (5 mL) and DCM (10 mL) was added glutaraldehyde (0.1 g, 1.03 mmol). To the resulting mixture, sodium cyanoborohydride (0.74 g, 11.56 mmol) was added in portions at 15 °C. The reaction mixture was further diluted with DCM (70 mL) and stirred for 8 h. Volatile matters were removed under high vacuum, and the residue thus obtained was diluted with DCM (50 mL) and washed with water (3 x 30 mL). The organic layer was separated, dried over anhydrous  $\text{Na}_2\text{SO}_4$ , and filtered. The filtrate was evaporated to dryness. The crude compound thus obtained was purified by column chromatography to afford **10** (0.32 g, 68.0% yield).  $^1\text{H}$  NMR (400 MHz,  $\text{CDCl}_3$ )  $\delta$  9.18 (s, 1H), 8.07 (d,  $J = 8.2$  Hz, 1H), 5.88 (d,  $J = 1.9$  Hz, 1H), 5.69 (dd,  $J = 8.1, 2.1$  Hz, 1H), 4.36 – 3.96 (m, 3H), 3.97 – 3.72 (m, 1H), 3.61 (dd,  $J = 4.7, 1.9$  Hz, 1H), 3.54 (s, 3H), 3.41 – 3.24 (m, 2H), 2.36 (s, 2H), 1.74 (s, 2H), 1.56 (d,  $J = 18.3$  Hz, 3H), 1.24 – 1.11 (m, 1H), 0.90 (s, 9H), 0.09 (d,  $J = 3.4$  Hz, 6H) ppm.  $^{13}\text{C}$  NMR (126 MHz,  $\text{CDCl}_3$ )  $\delta$  163.5, 150.2, 140.5, 101.7, 88.1, 84.2, 82.5, 69.4, 68.7, 58.5, 56.9, 25.8, 25.5, 23.5, 18.3, -4.5, -4.7 ppm. HRMS calc. for  $\text{C}_{21}\text{H}_{38}\text{N}_3\text{O}_6\text{Si}$   $[\text{M} + \text{H}]^+$  456.2530, found 456.2520.

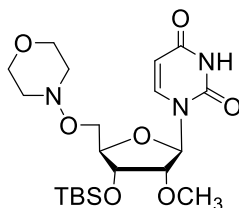

**1-[(2R,5R)-4-[tert-butyl(dimethyl)silyl]oxy-3-methoxy-5-(morpholinoxymethyl)tetrahydrofuran-2-yl]pyrimidine-2,4-dione (11):** To a clear solution of **9** (2.4 g, 6.19 mmol) in acetic acid (20 mL) was added 2-(2-oxoethoxy)acetaldehyde<sup>5</sup> (0.63 g, 6.19 mmol) followed by sodium cyanoborohydride (4.13 g, 64.4 mmol) in portions. After stirring at 15 °C for 12 h, the mixture was diluted with DCM (50 mL), and the organic layer was washed with water (2 x 30 mL). The DCM layer was dried over anhydrous Na<sub>2</sub>SO<sub>4</sub> and filtered. The filtrate was evaporated to dryness. The crude residue was purified by column chromatography to afford **11** (0.88 g, 31% yield) as a white solid. <sup>1</sup>H NMR (500 MHz, CDCl<sub>3</sub>) δ 8.50 (s, 1H), 7.93 (d, *J* = 8.2 Hz, 1H), 5.86 (d, *J* = 2.0 Hz, 1H), 5.70 (dd, *J* = 8.2, 2.0 Hz, 1H), 4.23 – 4.06 (m, 3H), 3.92 (dd, *J* = 11.9, 3.0 Hz, 3H), 3.67 – 3.57 (m, 3H), 3.55 (s, 3H), 3.23 (dd, *J* = 28.2, 10.2 Hz, 2H), 2.65 (q, *J* = 10.1 Hz, 2H), 0.91 (s, 9H), 0.10 (d, *J* = 5.8 Hz, 6H) ppm. <sup>13</sup>C NMR (126 MHz, CDCl<sub>3</sub>) δ 163.4, 150.1, 140.2, 101.8, 88.4, 84.1, 82.1, 69.4, 68.9, 66.4, 58.6, 56.4, 25.8, 18.3, -4.4, -4.7 ppm. HRMS calc. for C<sub>20</sub>H<sub>36</sub>N<sub>3</sub>O<sub>7</sub>Si [M + H]<sup>+</sup> 458.2323, found 458.2315.

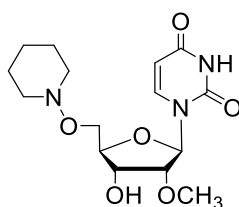

**1-[(2R,5R)-4-hydroxy-3-methoxy-5-(1-piperidyloxymethyl)tetrahydrofuran-2-yl]pyrimidine-2,4-dione (12):** To a solution of **10** (0.30 g, 0.66 mmol) in THF (5 mL) at 25 °C, tetrabutylammonium fluoride, 1 M in THF (0.99 mmol, 0.99 mL), was added slowly in a single portion and then stirred for 5 h. Volatile matters were removed under high vacuum, and the crude residue thus obtained was purified by column chromatography (gradient: 10-60% EtOAc in hexanes) to afford **12** (0.17 g, 76% yield). <sup>1</sup>H NMR (400 MHz, CDCl<sub>3</sub>) δ 8.79 (s, 1H), 7.97 (d, *J* = 8.2 Hz, 1H), 5.94 (d, *J* = 2.2 Hz, 1H), 5.71 (dd, *J* = 8.2, 1.8 Hz, 1H), 4.20 (td, *J* = 7.4, 5.2 Hz, 1H), 4.16 – 4.11 (m, 1H), 4.08 (dt, *J* = 7.1, 2.6 Hz, 1H), 3.95 (dd, *J* = 11.2, 2.7 Hz, 1H), 3.77 (dd, *J* = 5.2, 2.3 Hz, 1H), 3.61 (s, 3H), 3.36 (s, 2H), 2.84 (d, *J* = 7.7 Hz, 1H), 2.39 (t, *J* = 11.4 Hz, 2H), 1.76 (d, *J* = 13.0 Hz, 2H), 1.59 (brs, 2H) ppm. <sup>13</sup>C NMR (101 MHz, CDCl<sub>3</sub>) δ 163.2, 150.2, 140.2, 102.0, 87.6, 84.0, 83.1, 69.5, 69.1, 58.8, 57.0, 56.7, 25.5, 23.5 ppm. HRMS calc. for C<sub>15</sub>H<sub>24</sub>N<sub>3</sub>O<sub>6</sub> [M + H]<sup>+</sup> 342.1665, found 342.1656.

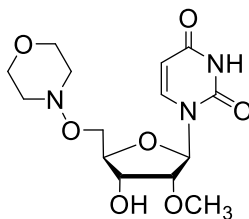

**1-[(2R,5R)-4-hydroxy-3-methoxy-5-(morpholinoxymethyl)tetrahydrofuran-2-yl]pyrimidine-2,4-dione (13):** To a solution of **11** (0.85 g, 1.86 mmol) in THF (15 mL) at 22 °C, tetrabutylammonium fluoride, 1 M in THF (2.41 mmol, 2.41 mL), was added slowly in single portion and then stirred for 3 h. Volatile matters were removed under high vacuum, and the crude residue thus obtained was purified by column chromatography (gradient: 0-5% MeOH in DCM) to afford **13** (0.52 g, 81% yield) as a white solid. <sup>1</sup>H NMR (500 MHz, CDCl<sub>3</sub>) δ 9.26 (s, 1H), 7.85 (d, *J* = 8.2 Hz, 1H), 5.93 (d, *J* = 2.1 Hz, 1H), 5.73 (d, *J* = 8.2 Hz, 1H), 4.23 – 4.14 (m, 2H), 4.08 (dt, *J* = 7.3, 2.9 Hz, 1H), 3.98 (dd, *J* = 11.3, 3.2 Hz, 1H), 3.92 (d, *J* = 11.7 Hz, 2H), 3.81 – 3.71

(m, 1H), 3.62 (s, 5H), 3.25 (t,  $J = 9.1$  Hz, 2H), 2.81 (d,  $J = 8.3$  Hz, 1H), 2.67 (td,  $J = 10.9, 3.2$  Hz, 2H) ppm.  $^{13}\text{C}$  NMR (101 MHz,  $\text{CDCl}_3$ )  $\delta$  163.4, 150.2, 140.0, 102.1, 87.7, 83.7, 82.7, 69.6, 68.9, 66.3, 58.9, 56.5, 56.23 ppm. HRMS calc. for  $\text{C}_{14}\text{H}_{22}\text{N}_3\text{O}_7$   $[\text{M} + \text{H}]^+$  344.1458, found 344.1465.

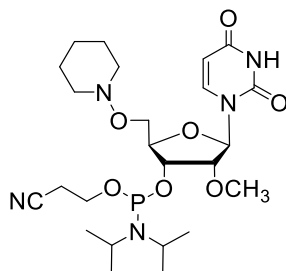

**3-[(diisopropylamino)-(2R,5R)-5-(2,4-dioxypyrimidin-1-yl)-4-methoxy-2-(1-piperidyl)oxy methyl]tetrahydrofuran-3-yl]oxy-phosphanyl]oxypropanenitrile (**14**):** To a clear solution of **12** (0.60 g, 1.76 mmol) in DCM (20 mL), diisopropylethylamine (1.15 g, 8.79 mmol, 1.55 mL) and N-methylimidazole (0.51 g, 6.15 mmol, 0.49 mL) were added at 22 °C. After 5 min, 2-cyanoethyl-*N,N*-diisopropylchlorophosphoramidite (0.88 g, 3.52 mmol, 0.82 mL) was added slowly. After stirring for 0.5 h, the reaction mixture was diluted with DCM (10 mL) and quenched with 10%  $\text{NaHCO}_3$  solution (20 mL). The organic layer was separated, dried on anhydrous  $\text{Na}_2\text{SO}_4$ , and filtered. The filtrate was evaporated to dryness. The crude compound thus obtained was purified by column chromatography (gradient: 20-80% EtOAc in hexanes) to afford **14** (0.66 g, 70% yield) as a hygroscopic solid.  $^1\text{H}$  NMR (400 MHz,  $\text{CDCl}_3$ )  $\delta$  8.81 (s, 1H), 7.96 (dd,  $J = 10.9, 8.1$  Hz, 1H), 5.97 (d,  $J = 3.7$  Hz, 1H), 5.69 (d,  $J = 8.1$  Hz, 1H), 4.49 – 4.16 (m, 2H), 4.09 (td,  $J = 11.2, 2.3$  Hz, 1H), 3.98 – 3.77 (m, 4H), 3.72 – 3.58 (m, 2H), 3.51 (d,  $J = 14.2$  Hz, 3H), 3.39 – 3.23 (m, 2H), 2.64 (dt,  $J = 11.9, 6.3$  Hz, 2H), 2.39 (d,  $J = 10.5$  Hz, 2H), 1.73 (s, 2H), 1.58 (s, 3H), 1.30 – 1.06 (m, 15H) ppm.  $^{13}\text{C}$  NMR (101 MHz,  $\text{CDCl}_3$ )  $\delta$  163.4, 163.4, 150.4, 150.3, 140.4, 140.2, 117.8, 117.6, 102.1, 102.0, 87.8, 87.5, 83.5, 83.4, 83.1, 83.1, 82.4, 82.4, 82.2, 82.2, 70.9, 70.7, 70.1, 70.0, 69.6, 69.5, 58.9, 58.7, 58.7, 58.3, 58.3, 58.2, 58.1, 58.0, 56.9, 53.6, 43.6, 43.5, 43.4, 43.4, 25.4, 24.8, 24.7, 24.7, 24.7, 24.7, 23.5, 23.4, 20.6, 20.5, 20.5, 20.5 ppm.  $^{31}\text{P}$  NMR (162 MHz,  $\text{CDCl}_3$ )  $\delta$  150.98, 150.54 ppm. HRMS calc. for  $\text{C}_{24}\text{H}_{41}\text{N}_5\text{O}_7\text{P}$   $[\text{M} + \text{H}]^+$  542.2744, found 542.2747.

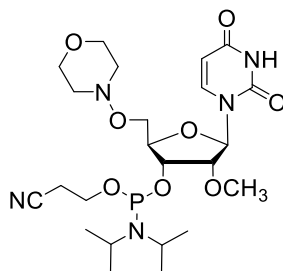

**3-[(diisopropylamino)-(2R,5R)-5-(2,4-dioxypyrimidin-1-yl)-4-methoxy-2-(morpholinooxy methyl)tetrahydrofuran-3-yl]oxy-phosphanyl]oxypropanenitrile (**15**):** To a solution of **13** (0.3 g, 0.87 mmol) in dry acetonitrile (10 mL) was added 5-(ethylthio)-*1H*-tetrazole (0.12 g, 0.87 mmol). 2-Cyanoethyl-*N,N,N',N'*-tetraisopropylphosphordiamidite (1.14 mmol, 0.37 mL) was added slowly to the reaction mixture and stirred at 22 °C for 3 h. The reaction mixture was filtered, volatile matters were removed under high vacuum, and the residue was purified by flash column chromatography using a gradient of EtOAc in hexanes containing 0.2% triethylamine to yield **15** as a white solid. To remove P (V) impurities from the column-purified compound, **15** was



dissolved in methyl *tert*-butylether (25 mL) and washed with 50% DMF in water (2 x 10 mL) and the with brine (3 x 20 mL). The organic layer was separated, dried over anhydrous Na<sub>2</sub>SO<sub>4</sub>, and filtered. The filtrate was evaporated under high vacuum to obtain **15** (0.31 g, 66% yield) as a white foam. <sup>1</sup>H NMR (400 MHz, CD<sub>3</sub>CN) δ 8.94 (s, 1H), 7.76 (dd, *J* = 8.9, 8.2 Hz, 1H), 5.88 (dd, *J* = 7.3, 4.6 Hz, 1H), 5.65 (dd, *J* = 8.2, 3.0 Hz, 1H), 4.50 – 4.14 (m, 2H), 4.08 – 3.98 (m, 1H), 3.92 – 3.74 (m, 5H), 3.65 (dtd, *J* = 10.3, 6.8, 4.7 Hz, 2H), 3.56 – 3.36 (m, 6H), 3.21 (d, *J* = 10.2 Hz, 2H), 2.75 – 2.51 (m, 4H), 1.28 – 1.10 (m, 17H) ppm. <sup>13</sup>C NMR (126 MHz, CD<sub>3</sub>CN) δ 163.9, 163.9, 151.4, 151.4, 141.0, 141.0, 119.6, 119.6, 102.8, 102.7, 88.4, 87.9, 83.5, 83.5, 83.2, 83.2, 83.2, 83.1, 82.7, 82.7, 72.2, 72.0, 71.6, 71.5, 71.0, 70.9, 66.8, 66.8, 59.8, 59.6, 59.2, 59.1, 58.9, 58.9, 58.6, 58.6, 57.2, 57.0, 49.5, 44.2, 44.2, 44.1, 44.1, 27.2, 25.0, 25.0, 24.9, 24.9, 24.9, 24.8, 21.1, 21.0, 21.0 ppm. <sup>31</sup>P NMR (202 MHz, CD<sub>3</sub>CN) δ 151.48, 151.16 ppm HRMS calc. for C<sub>23</sub>H<sub>38</sub>N<sub>5</sub>O<sub>8</sub>PNa [M + Na]<sup>+</sup> 566.2356, found 566.2379.

**Table S1:** Optimization of conditions for compound **4**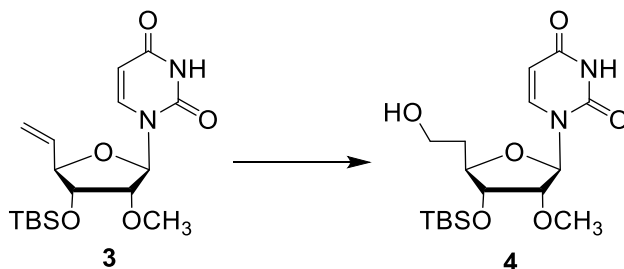

| Entry | Conditions <sup>a</sup>                                                                         | Product(s) (based on LCMS)        |
|-------|-------------------------------------------------------------------------------------------------|-----------------------------------|
| 1     | 9-BBN, sodium perborate tetrahydrate, THF, MeOH, H <sub>2</sub> O, 0-25 °C, 17 hr               | <b>4</b> (7%),<br><b>3</b> (70%)  |
| 2     | 9-BBN, sodium perborate tetrahydrate, THF, MeOH, H <sub>2</sub> O, 0-25 °C, 17 hr               | <b>4</b> (14%),<br><b>3</b> (69%) |
| 3     | 9-BBN, sodium perborate tetrahydrate, THF, MeOH, H <sub>2</sub> O, 30 °C, 17 hr                 | <b>4</b> (32%),<br><b>3</b> (21%) |
| 4     | BH <sub>3</sub> .THF, sodium perborate tetrahydrate, THF, MeOH, H <sub>2</sub> O, 0-25 °C, 3 hr | 85% unidentified byproduct        |
| 5     | 9-BBN, sodium perborate tetrahydrate, THF, MeOH, H <sub>2</sub> O, 40 °C, 3 hr                  | <b>4</b> (43%)                    |
| 6     | 9-BBN, sodium perborate tetrahydrate, THF, MeOH, H <sub>2</sub> O, 0 °C-rt, 50 hr               | <b>4</b> (75%)                    |

<sup>a</sup> Entry 5 is the optimized condition used during large scale synthesis of **4**.

<sup>1</sup>H, <sup>13</sup>C and <sup>31</sup>P NMR data

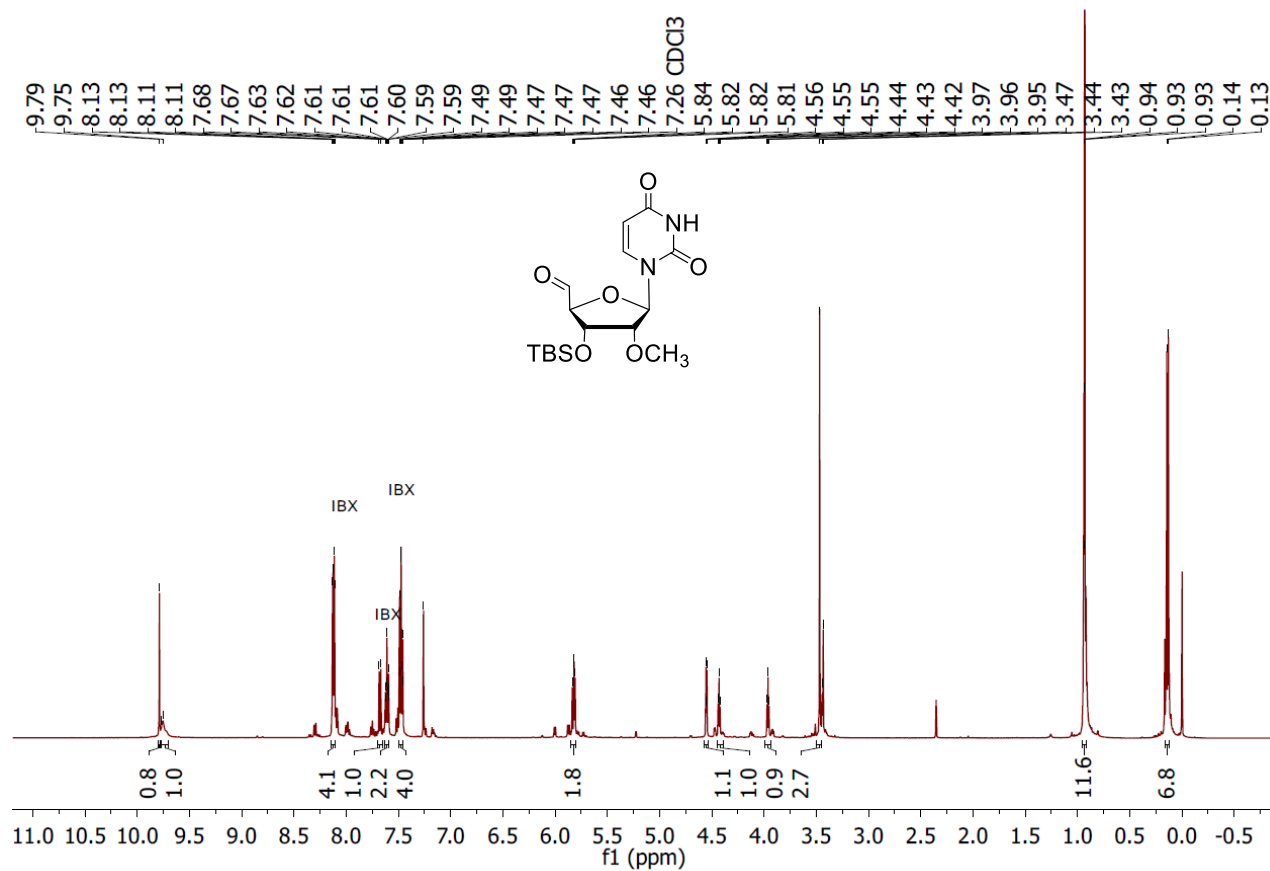

<sup>1</sup>H NMR (500 MHz, CDCl<sub>3</sub>) of 2.

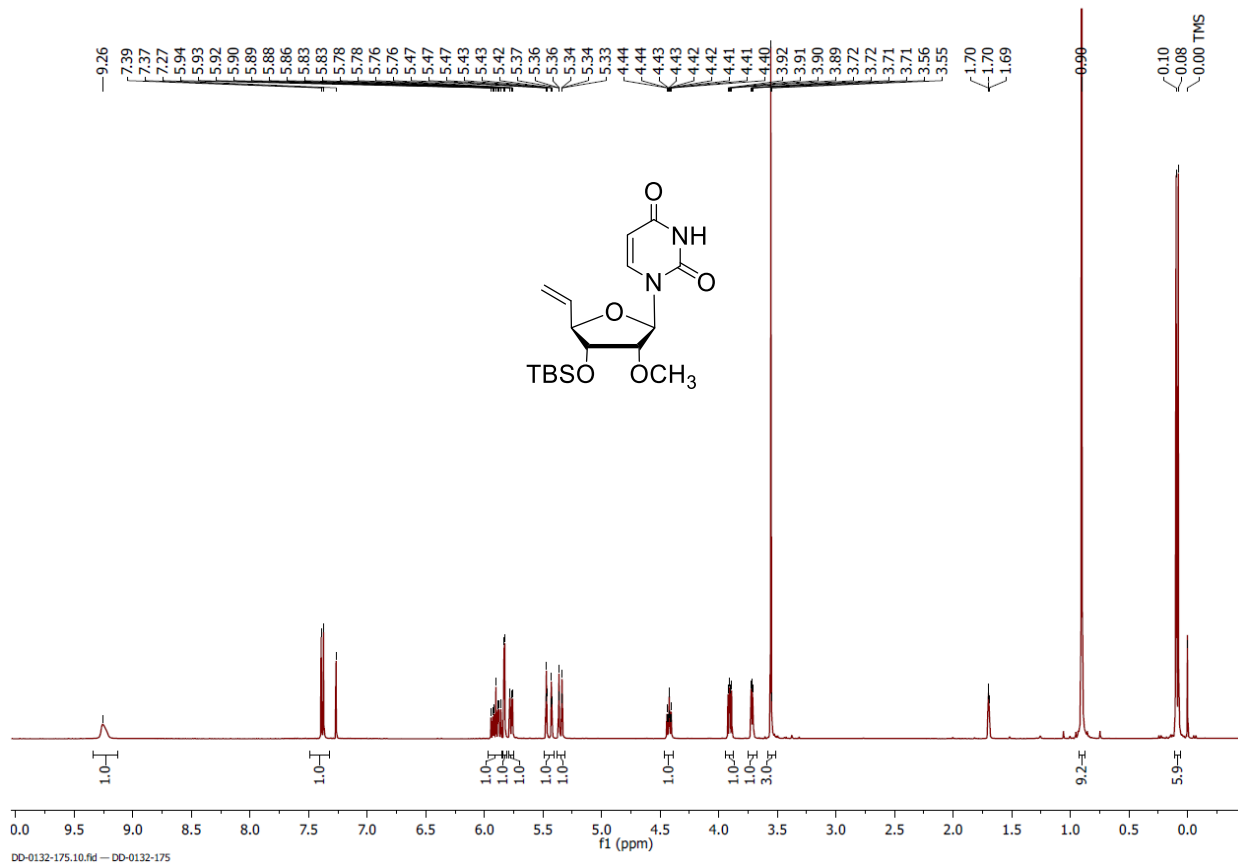

$^1\text{H}$  NMR (400 MHz,  $\text{CDCl}_3$ ) of **3**.

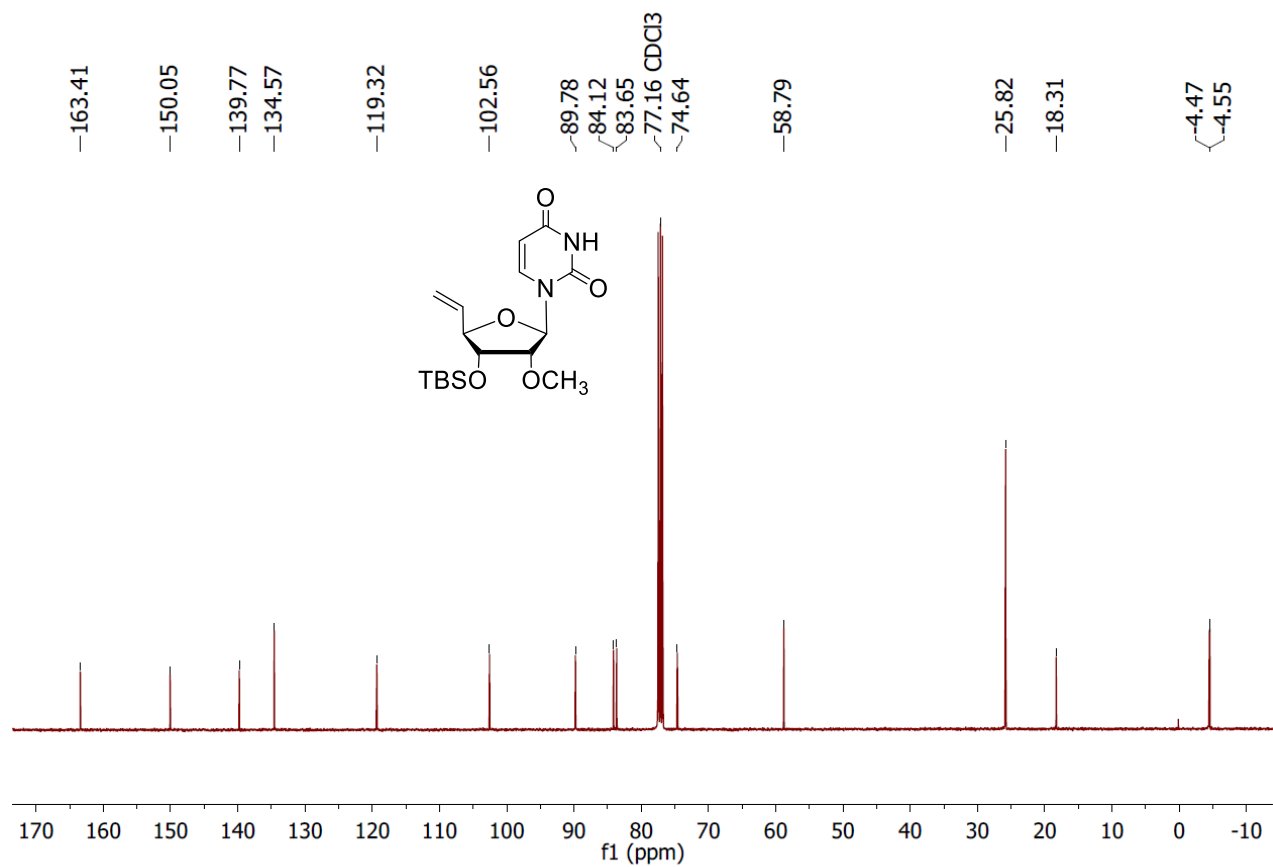

<sup>13</sup>C (101 MHz, CDCl<sub>3</sub>) of 3.

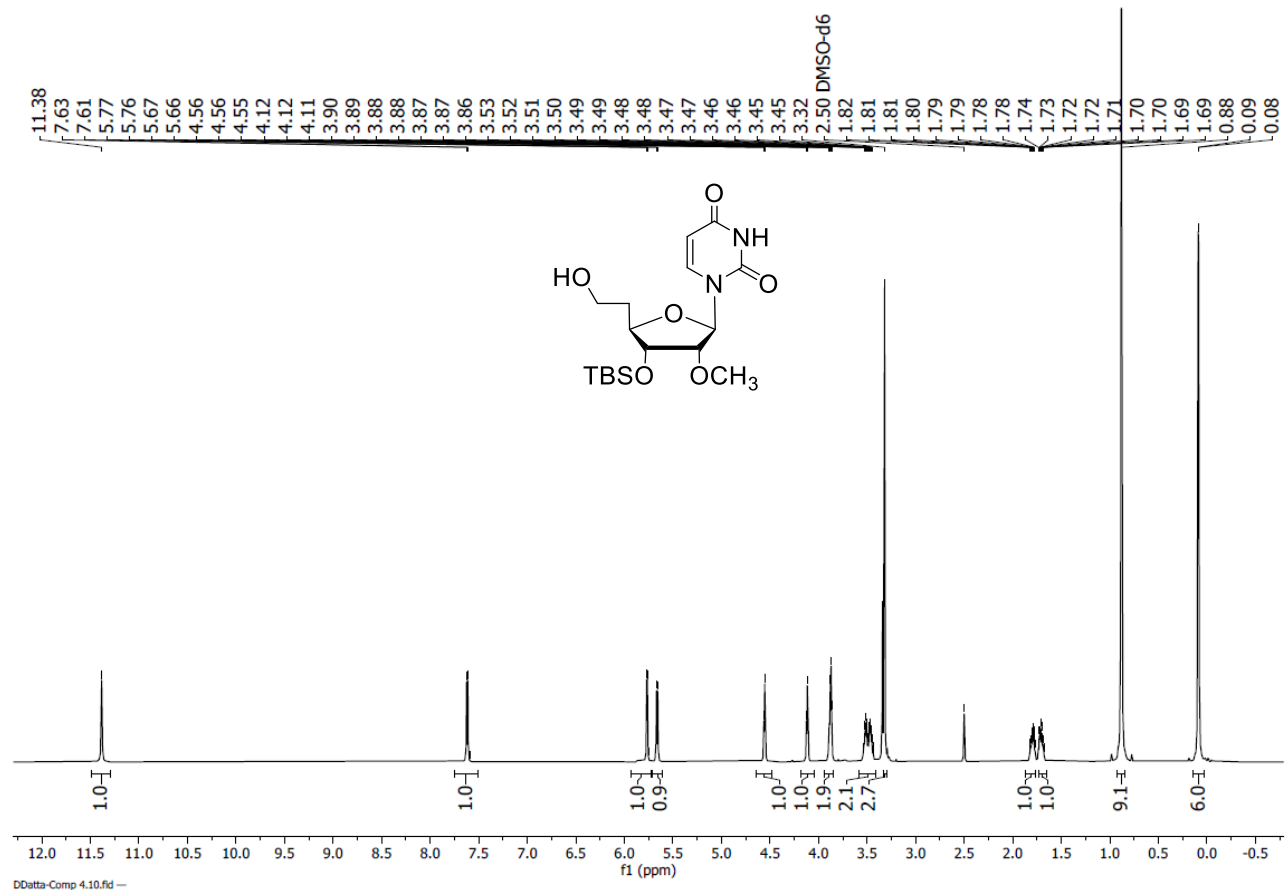

<sup>1</sup>H NMR (600 MHz, DMSO-d<sub>6</sub>) of 4.

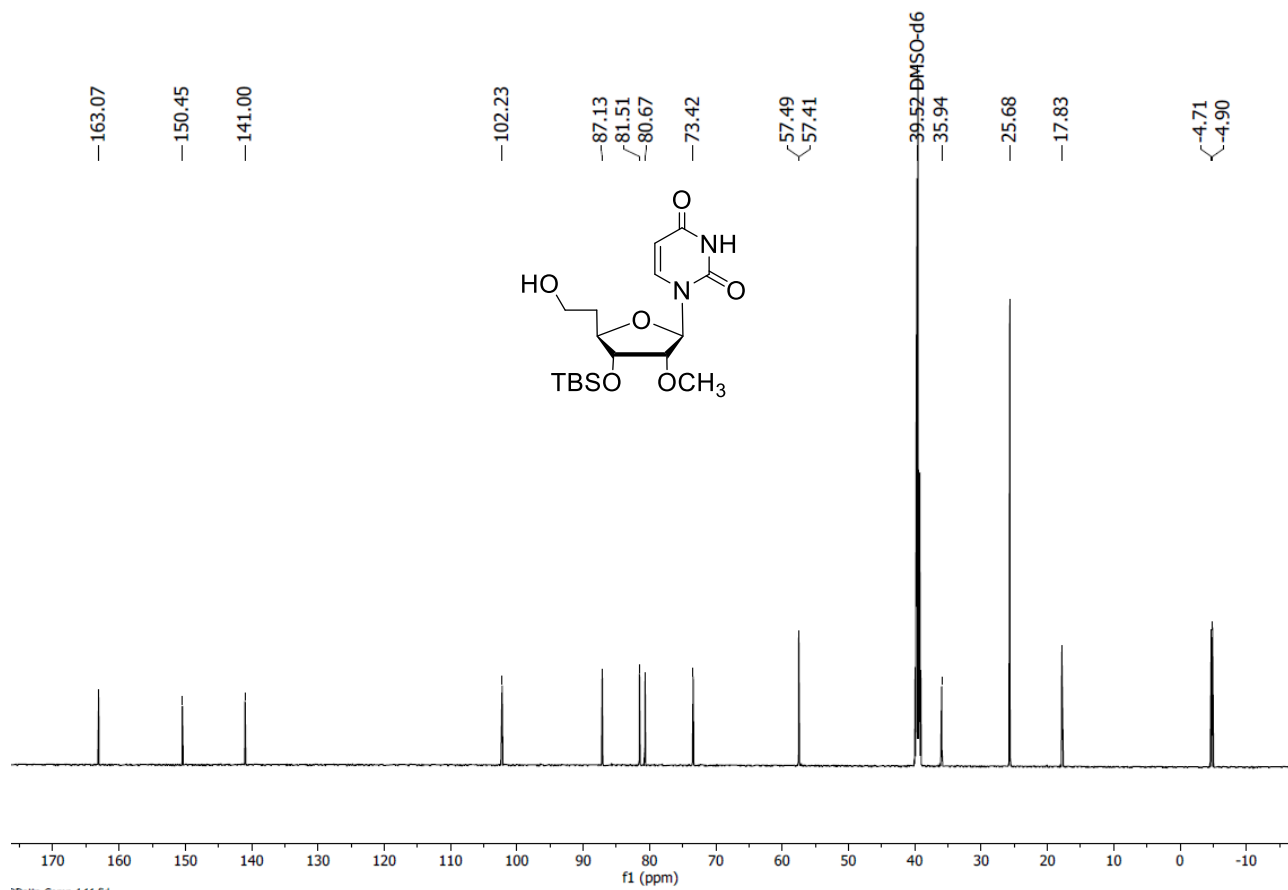

<sup>13</sup>C NMR (151 MHz, DMSO-*d*<sub>6</sub>) of 4.

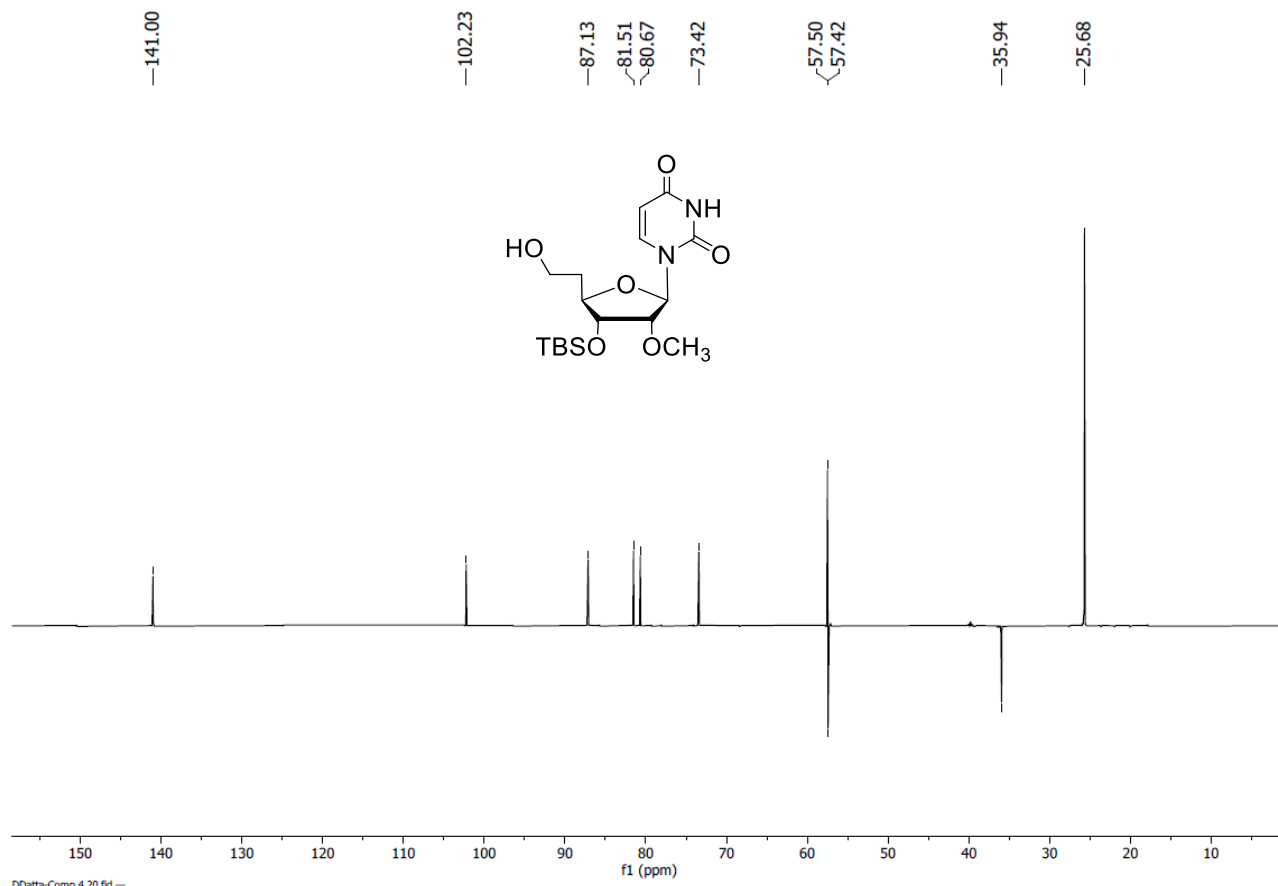

<sup>13</sup>C NMR (151 MHz, DMSO-*d*<sub>6</sub>) of **4**.



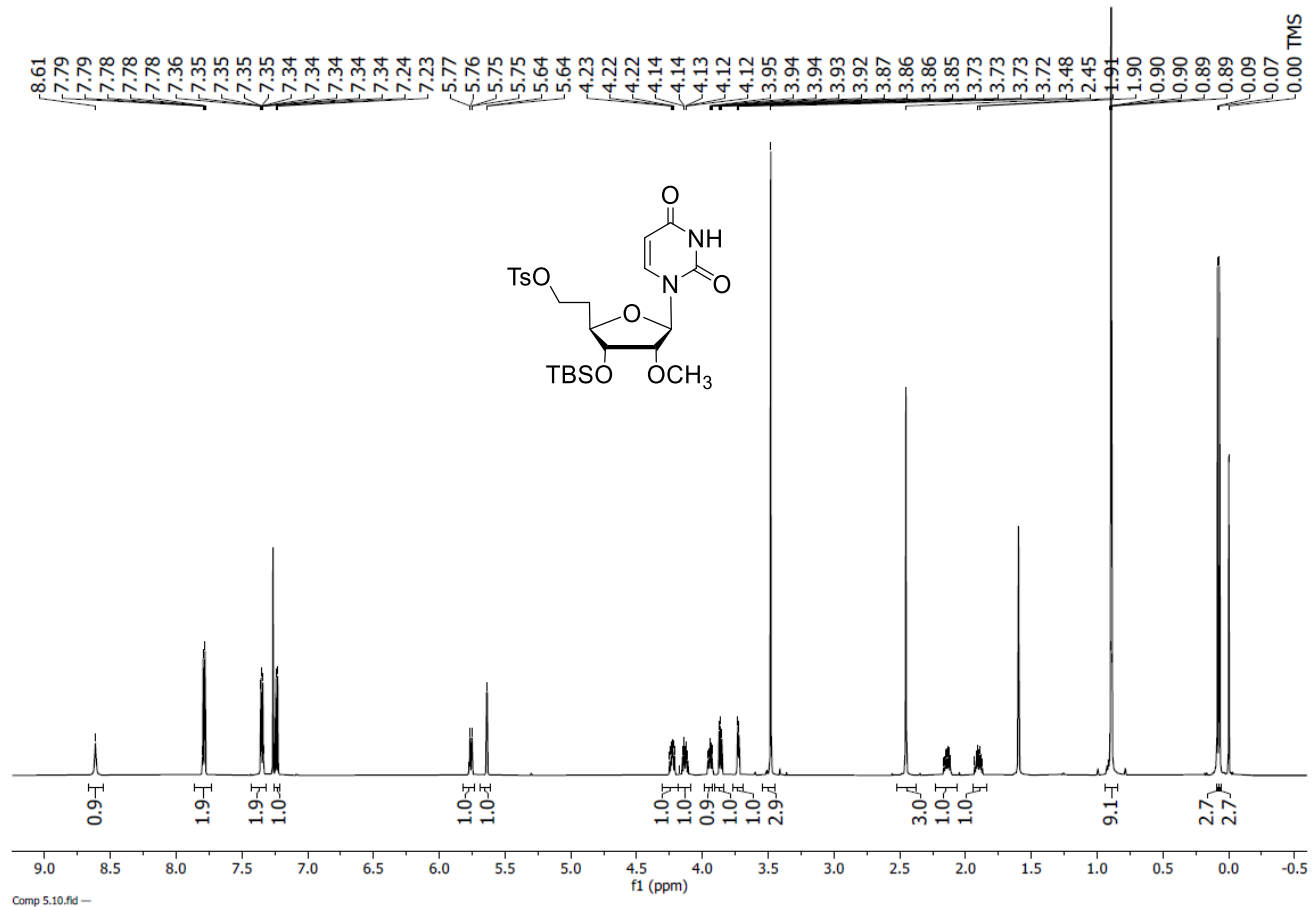

<sup>1</sup>H NMR (500 MHz, CDCl<sub>3</sub>) of 5.

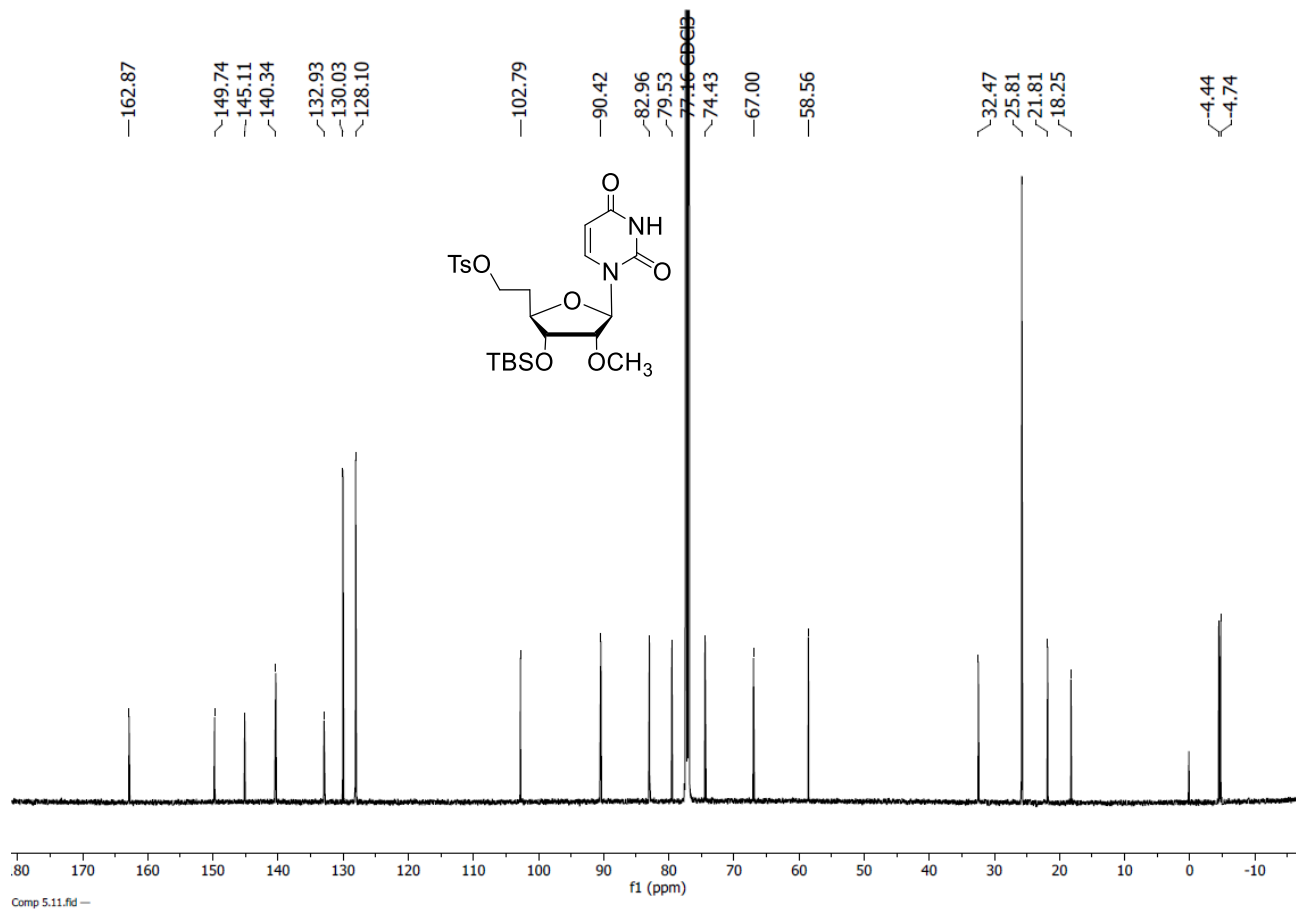

<sup>13</sup>C NMR (126 MHz, CDCl<sub>3</sub>) of 5.

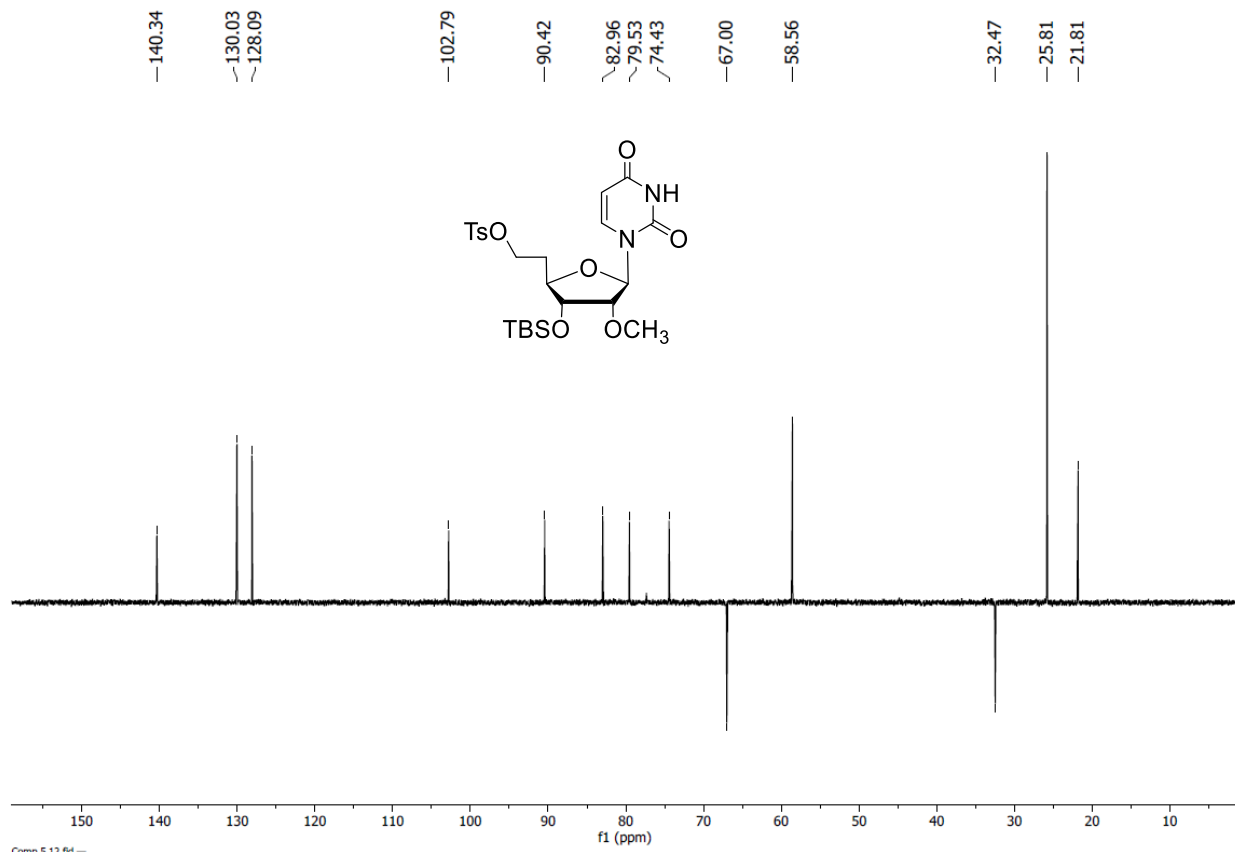

$^{13}\text{C}$  NMR (126 MHz,  $\text{CDCl}_3$ ) of **5**.

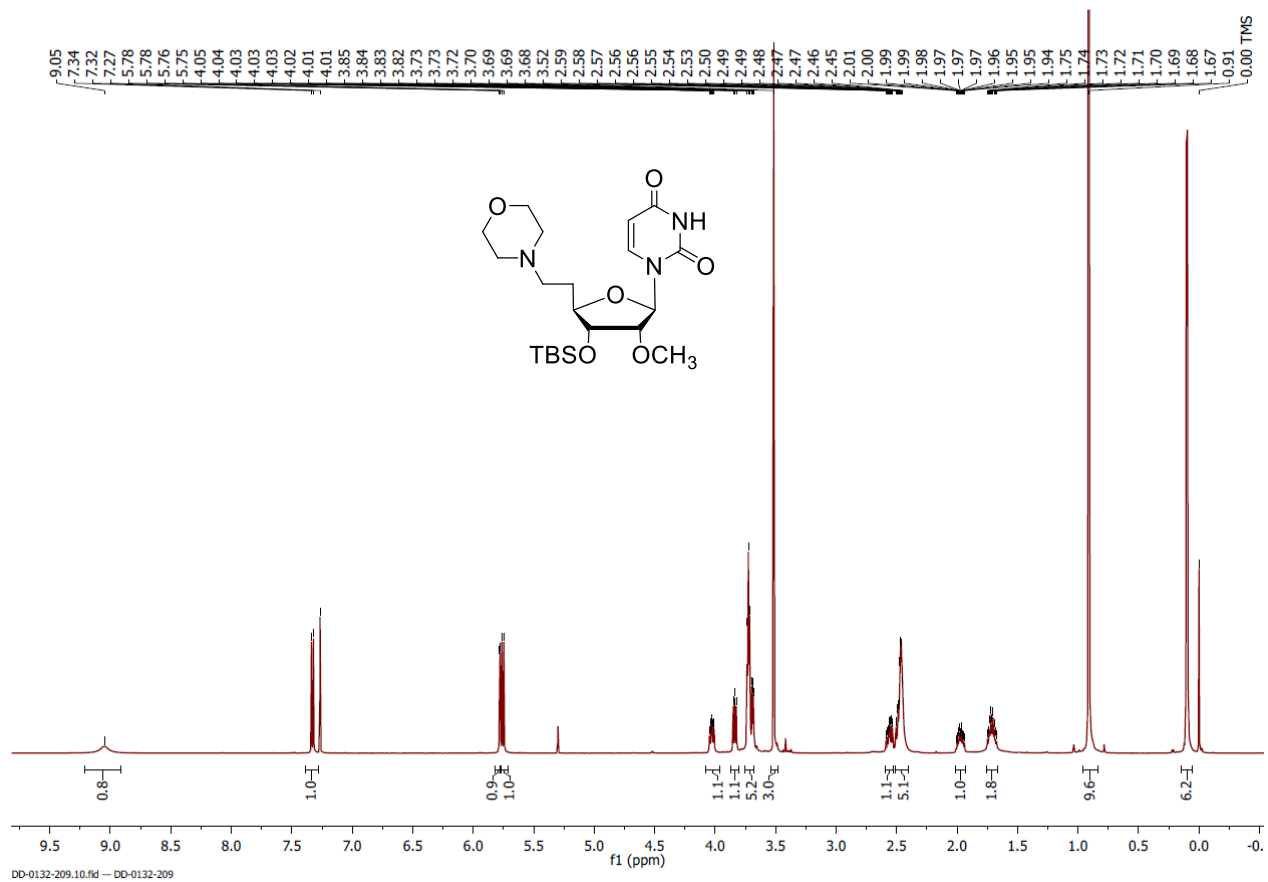

<sup>1</sup>H NMR (500 MHz, CDCl<sub>3</sub>) of 6.

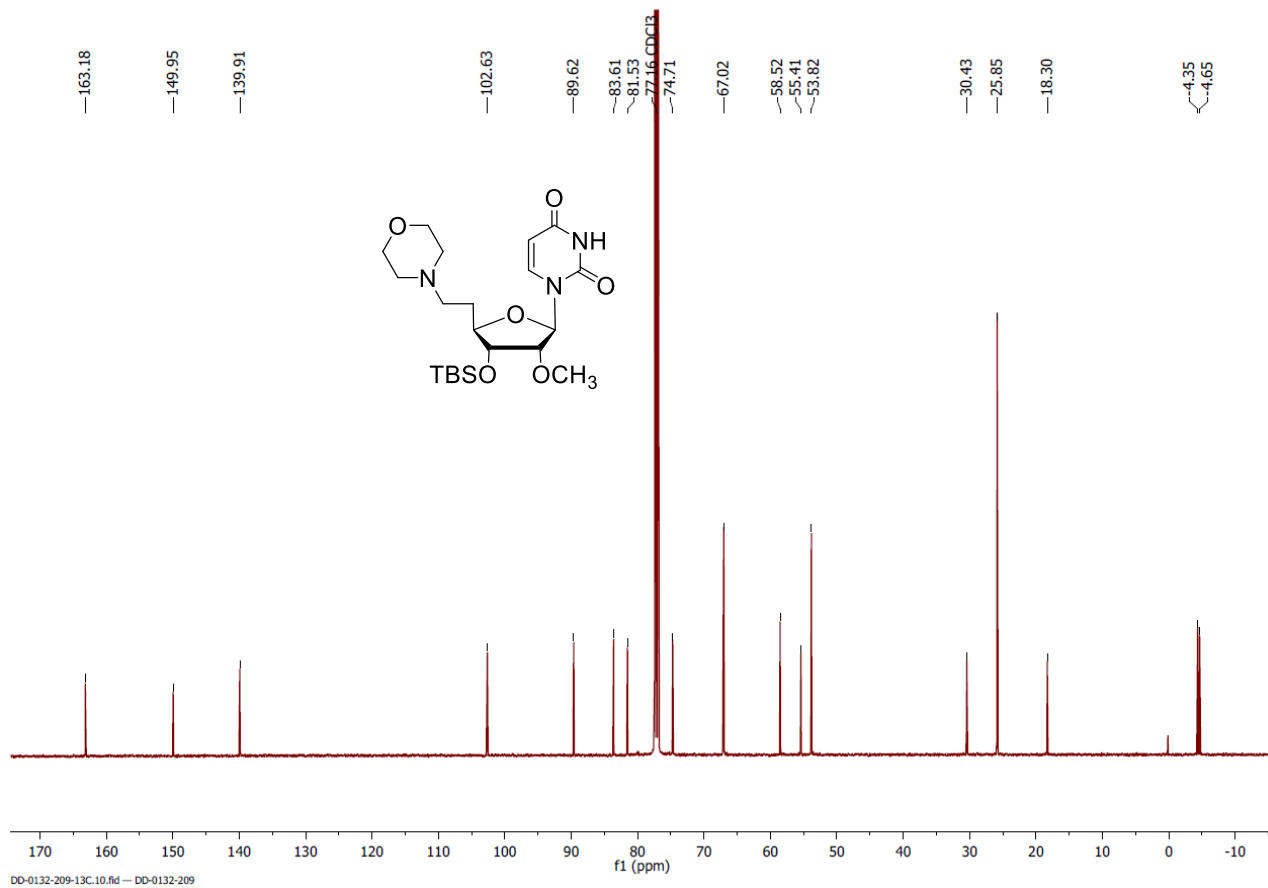

DD-0132-209-13C.10.fid -- DD-0132-209

<sup>13</sup>C NMR (126 MHz, CDCl<sub>3</sub>) of **6**.

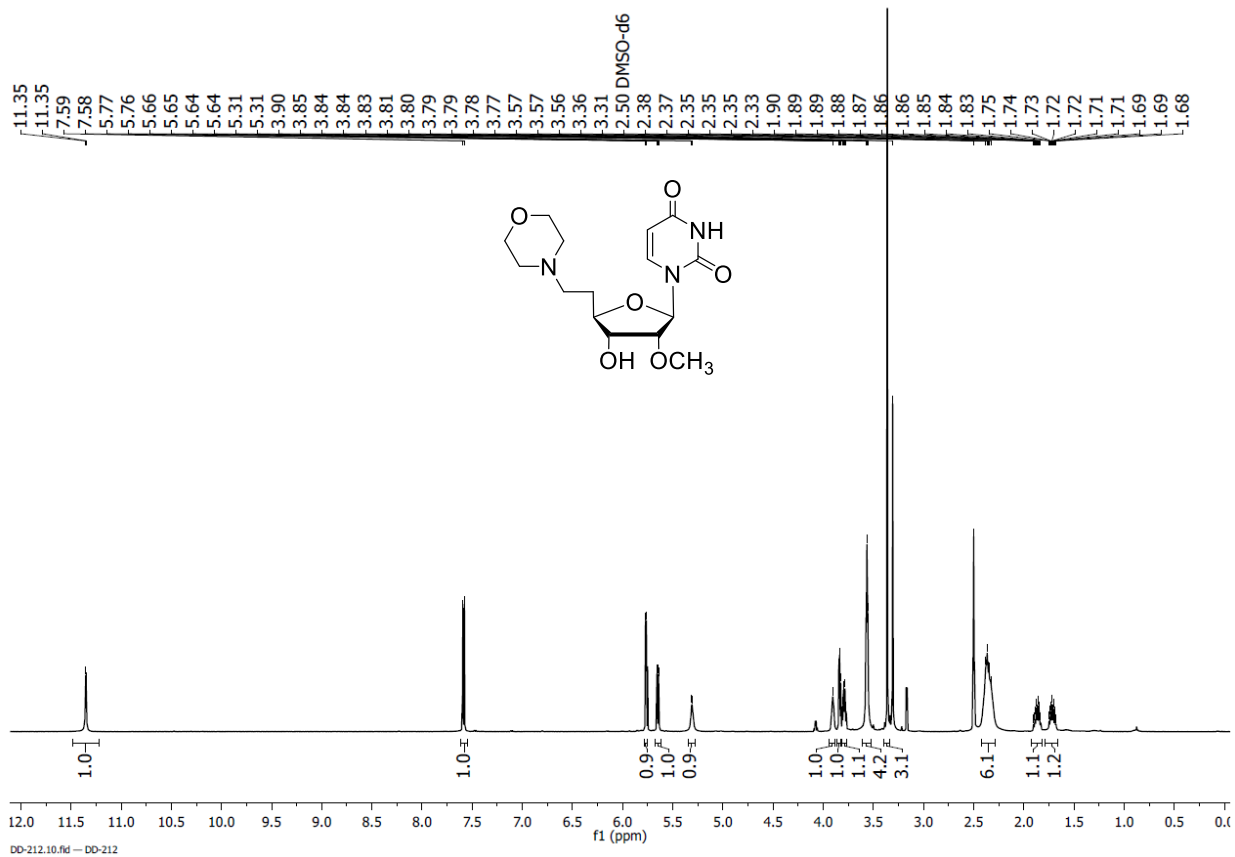

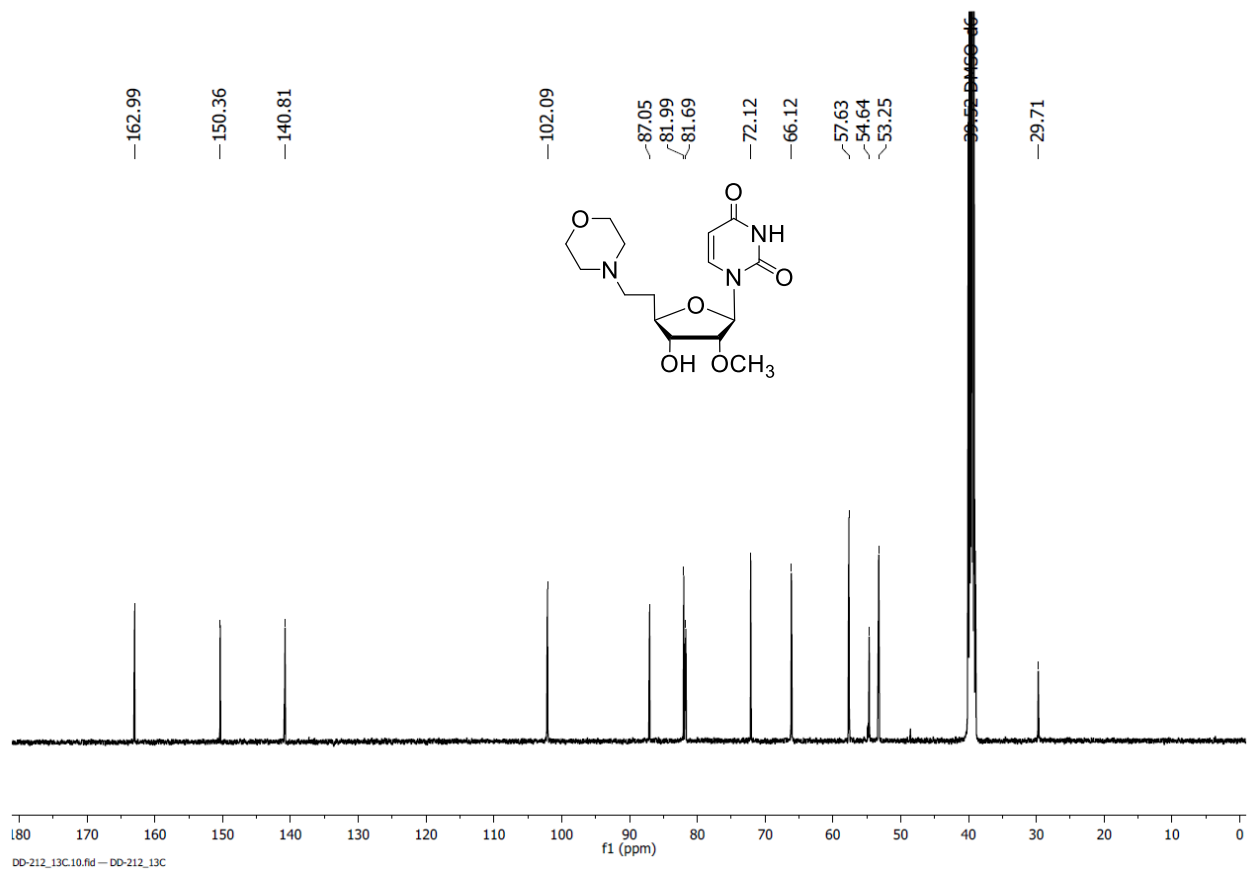

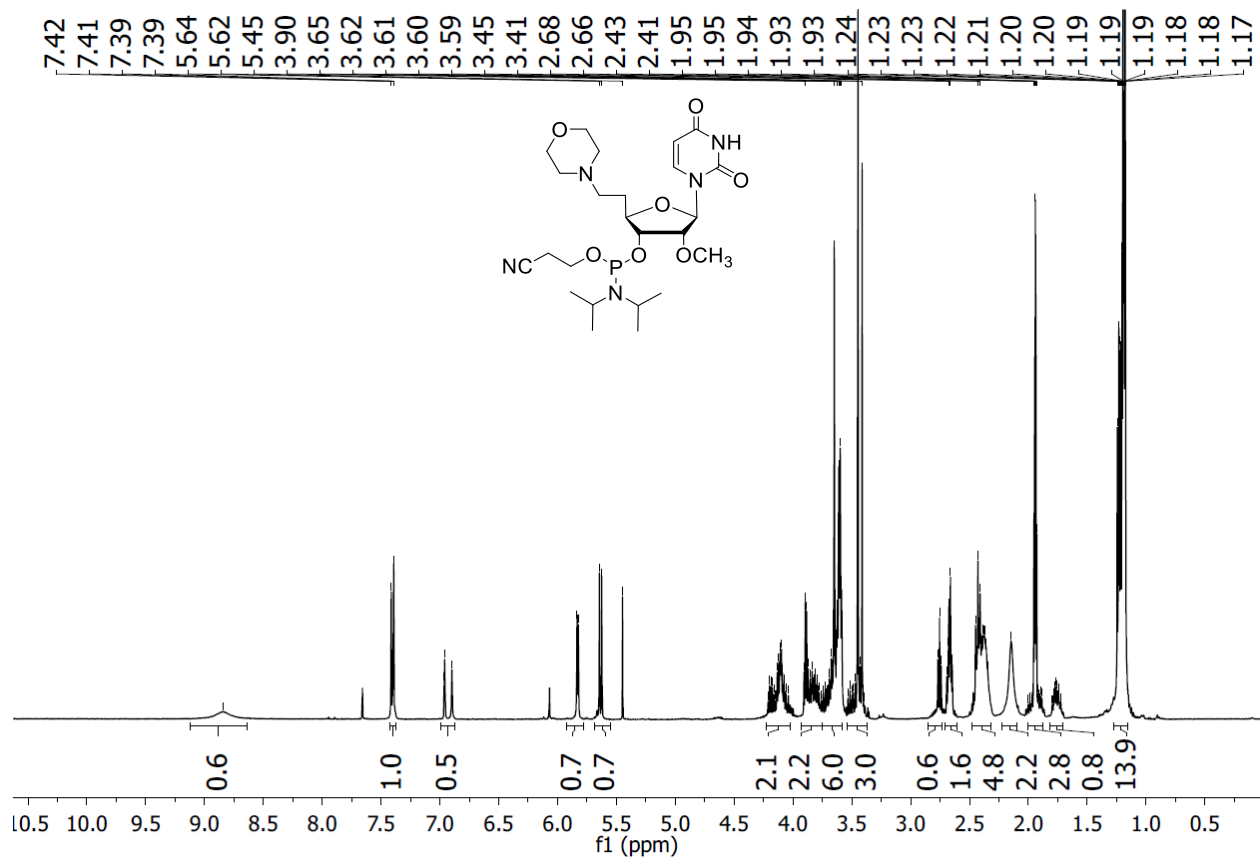

DD-213.10.fid — DD-213

$^1\text{H}$  NMR (400 MHz,  $\text{CD}_3\text{CN}$ ) of **8**.



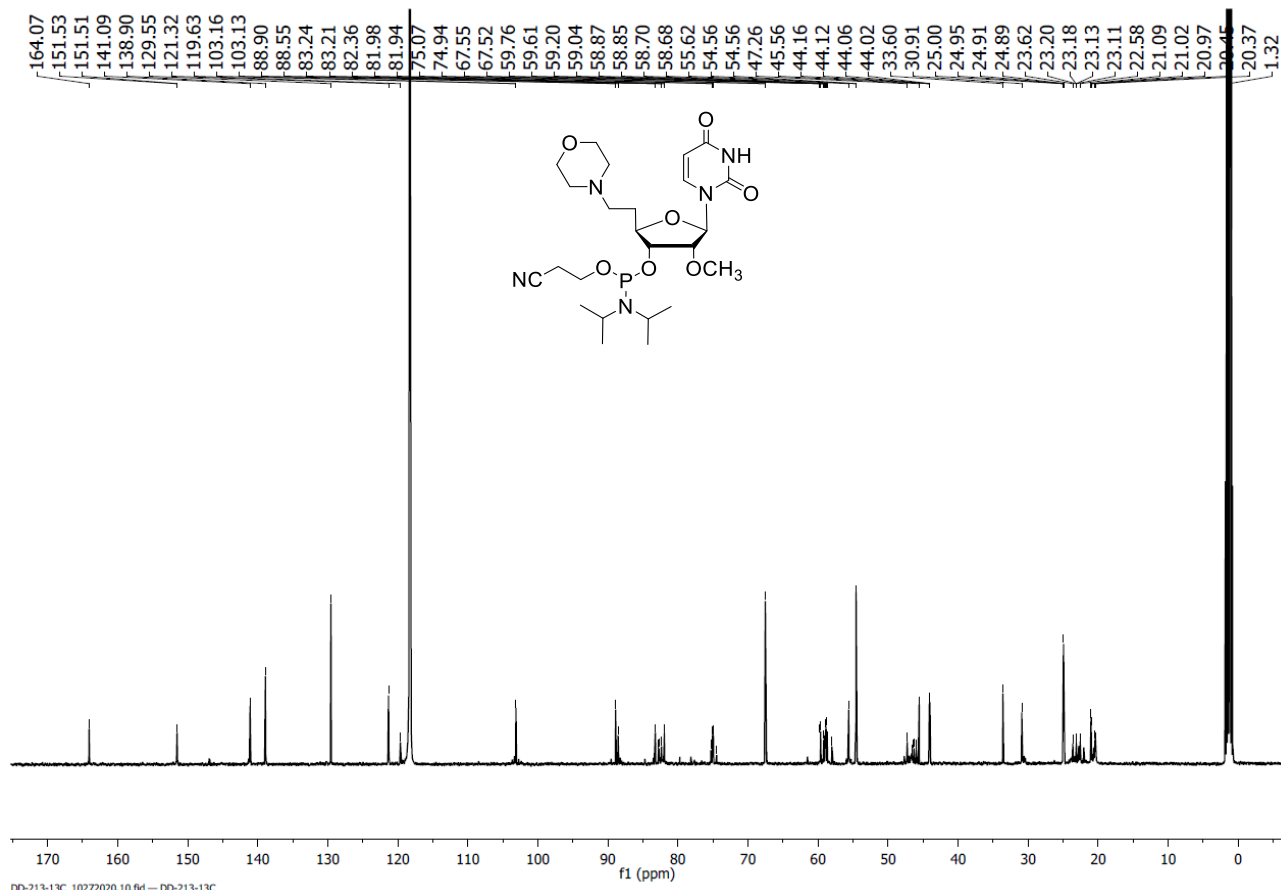

<sup>13</sup>C NMR (126 MHz, CD<sub>3</sub>CN) of 8.

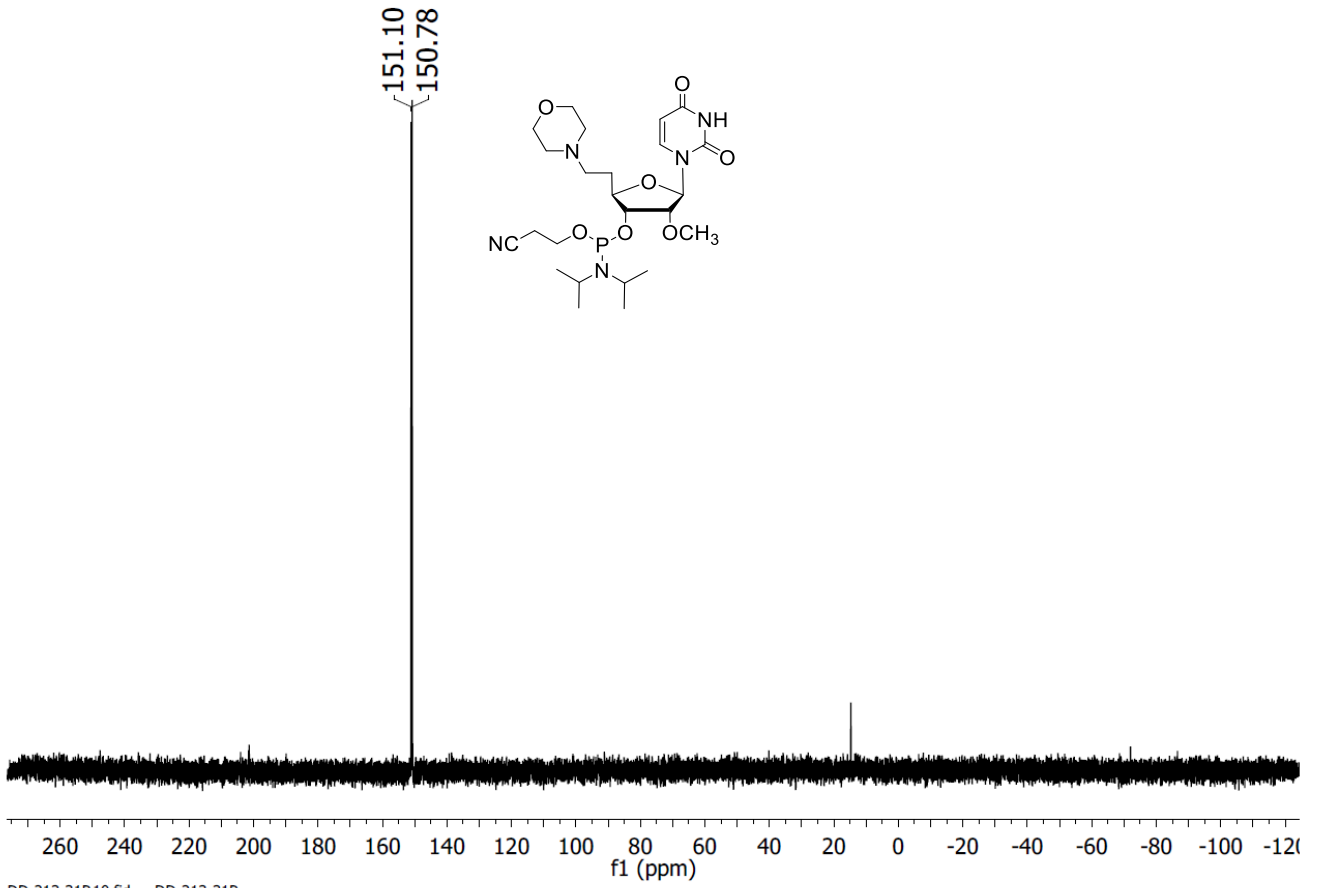

DD-213-31P.10.fid — DD-213-31P

$^{31}\text{P}$  NMR (202 MHz,  $\text{CD}_3\text{CN}$ ) of **8**.

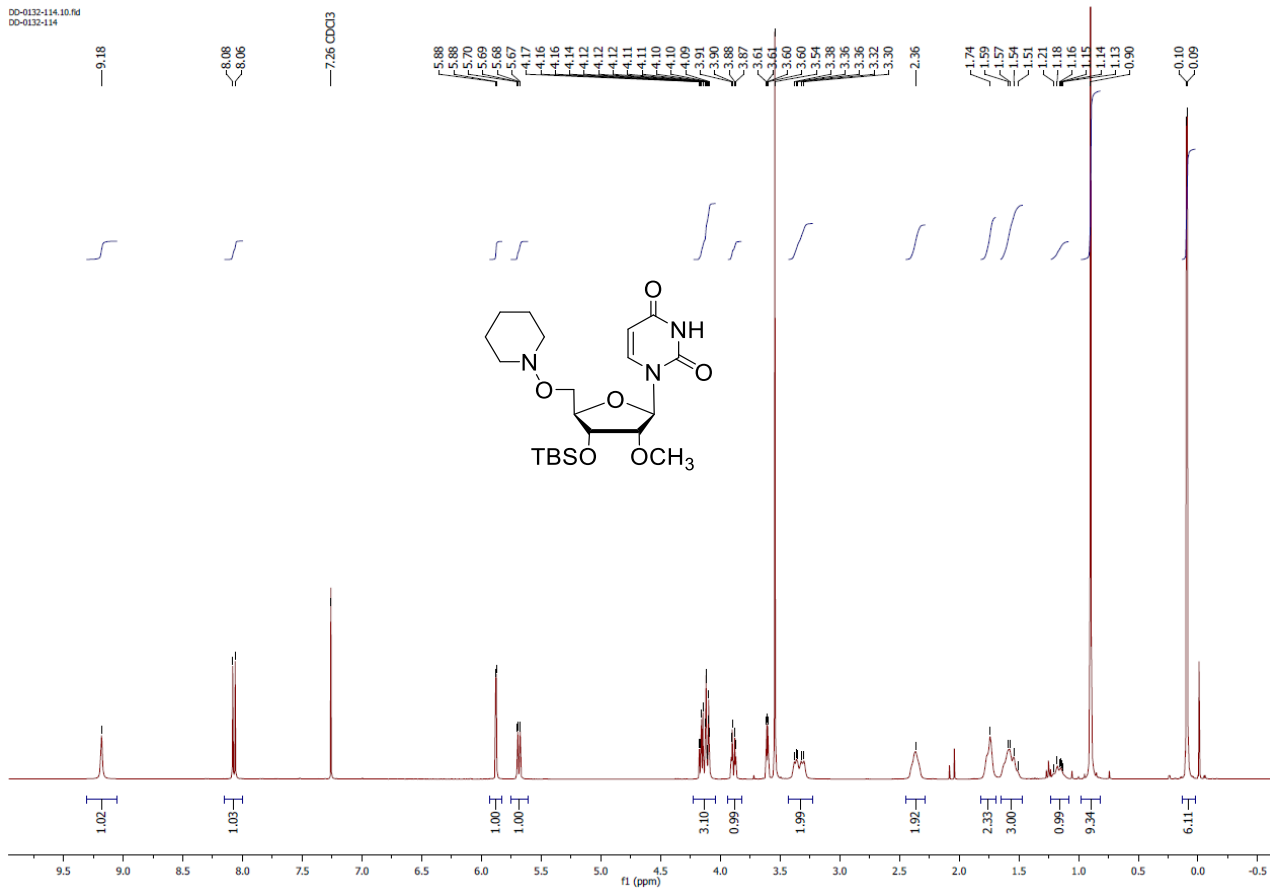

$^1\text{H}$  NMR (400 MHz,  $\text{CDCl}_3$ ) of **10**.

DD-0132-114-13C.10.fid  
DD-0132-114-13C

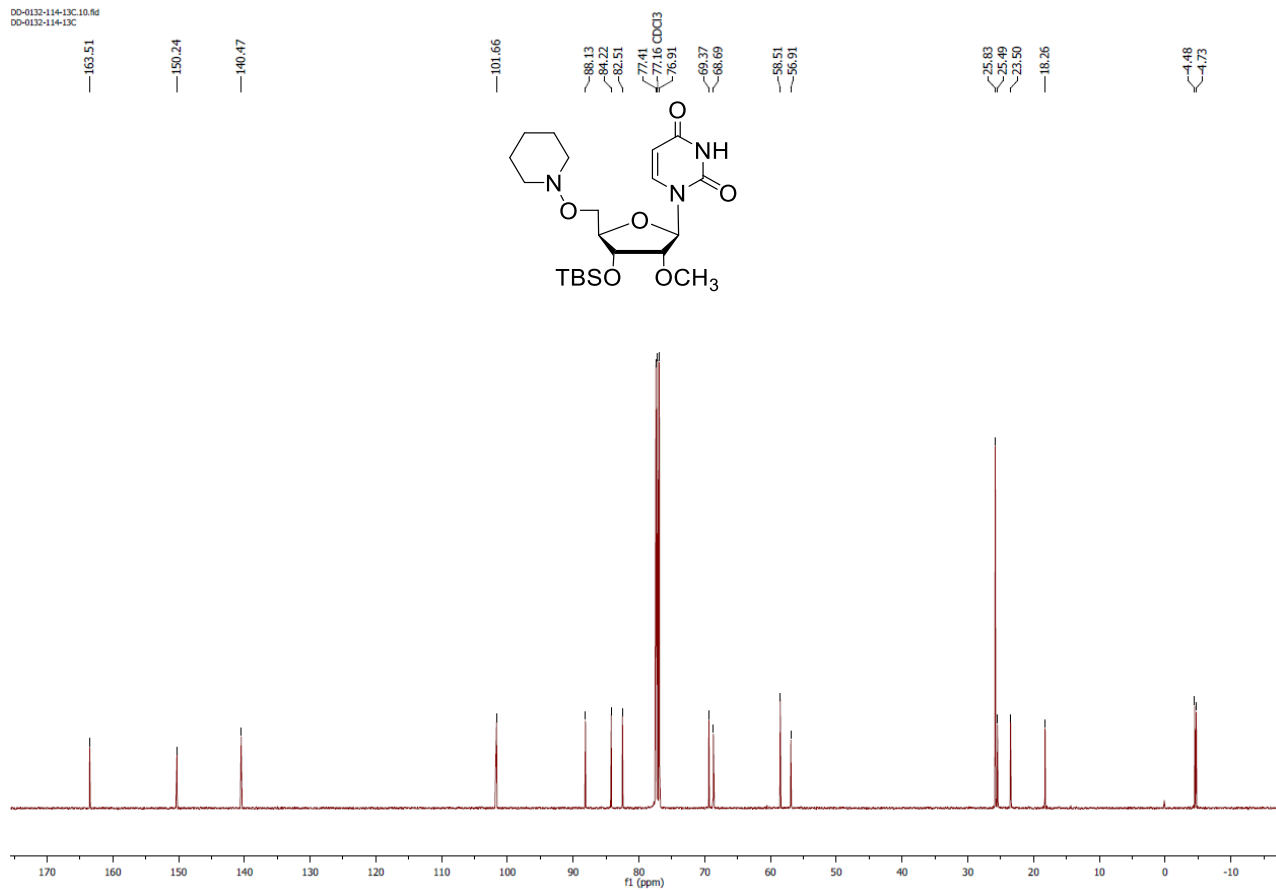

<sup>13</sup>C NMR (126 MHz, CDCl<sub>3</sub>) of **10**.

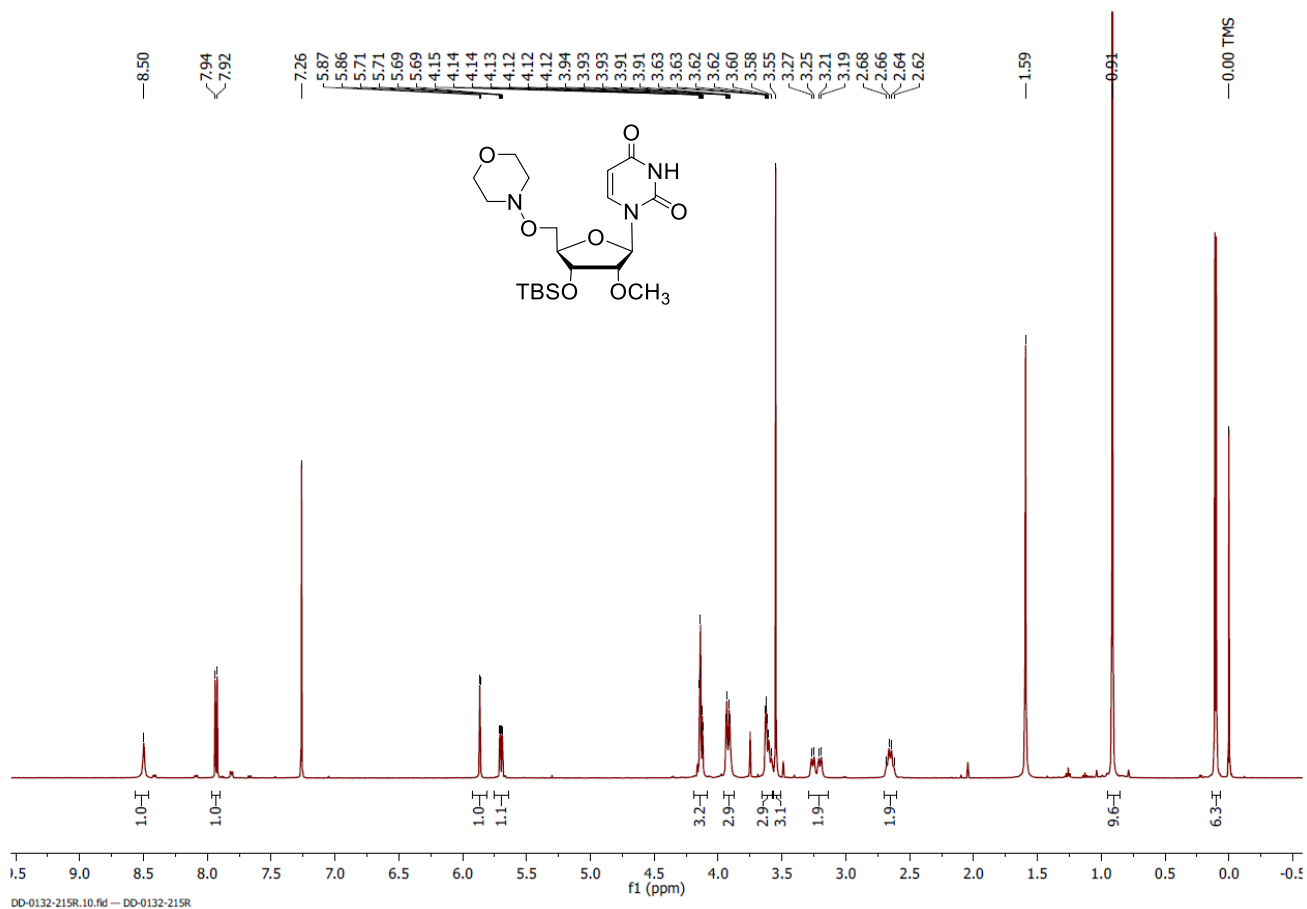

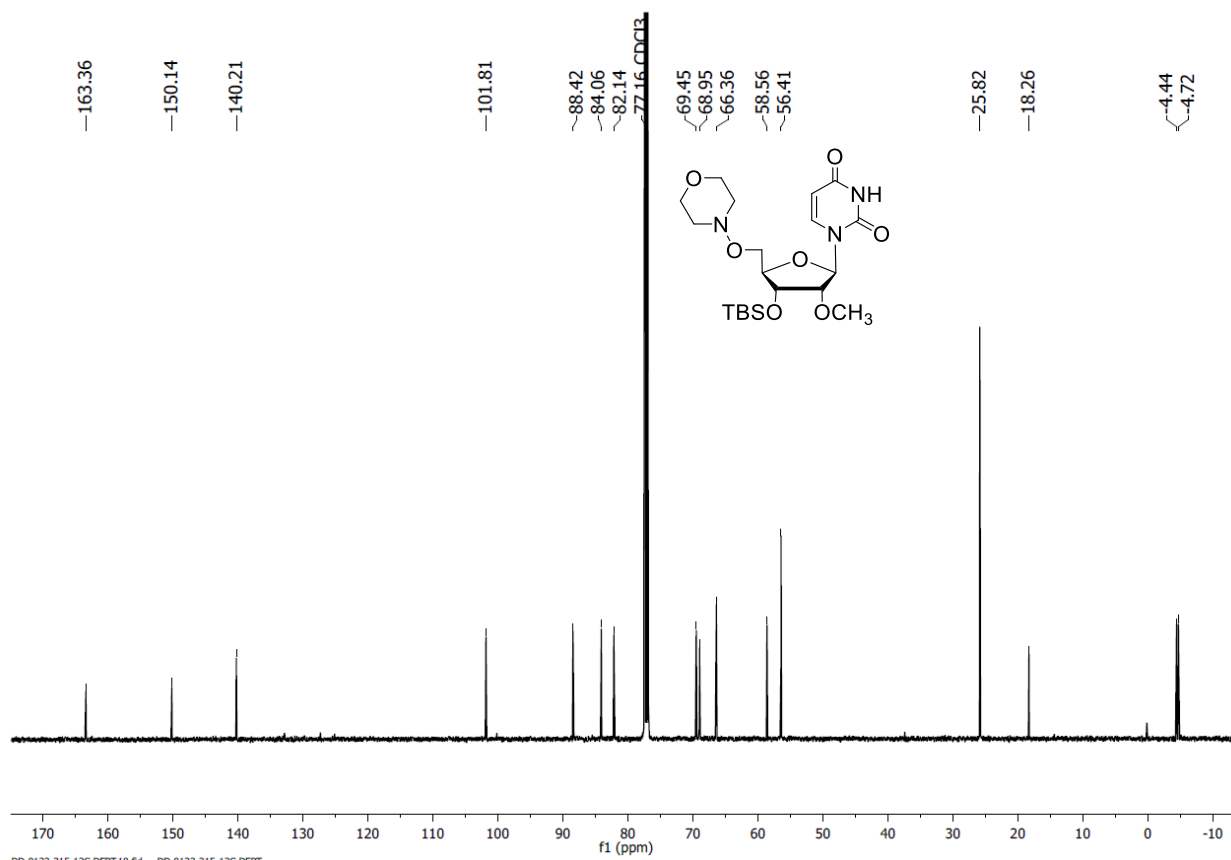

DD-0132-215-13C-DEPT.10.fid - DD-0132-215-13C-DEPT

<sup>13</sup>C NMR (126 MHz, CDCl<sub>3</sub>) of **11**.

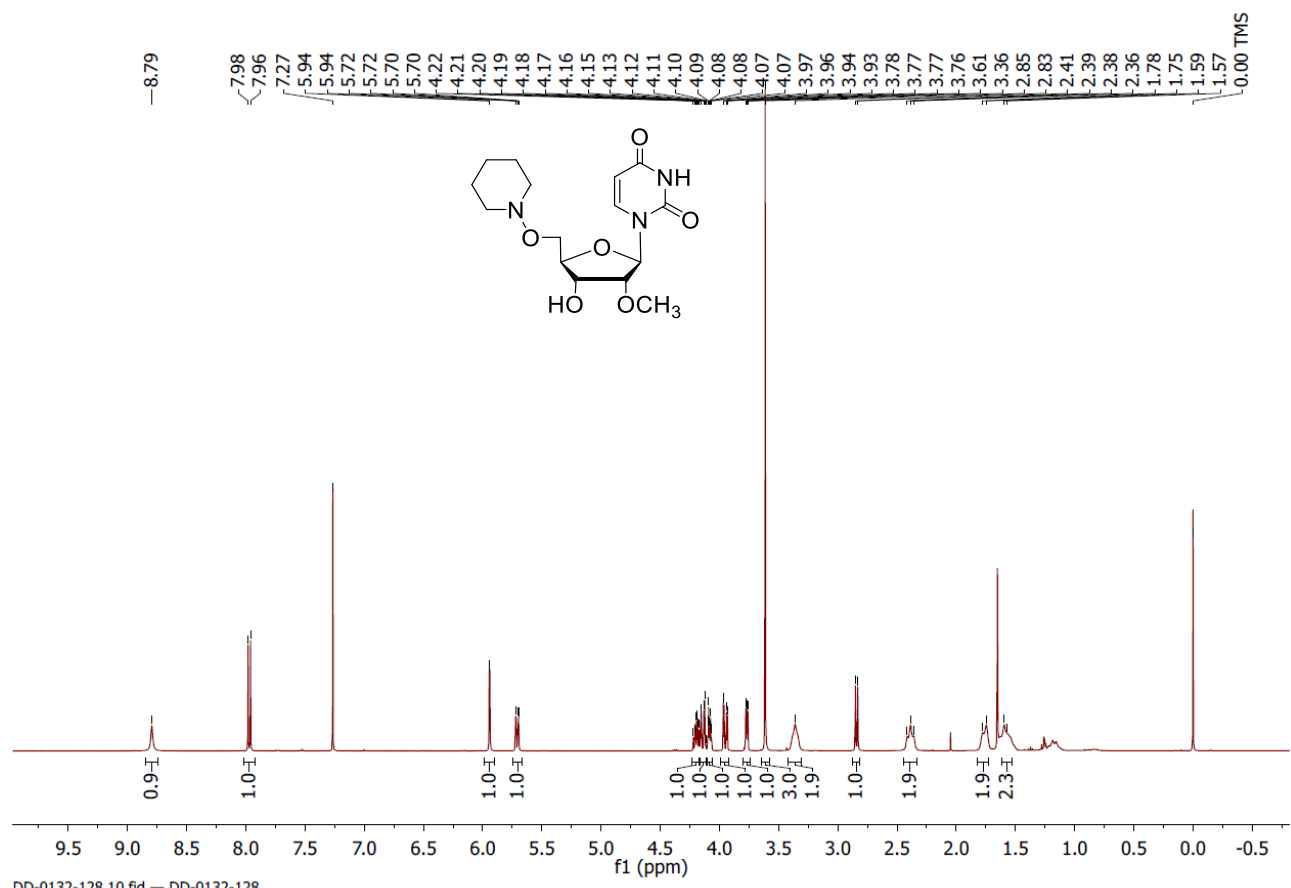

<sup>1</sup>H NMR (400 MHz, CDCl<sub>3</sub>) of **12**.

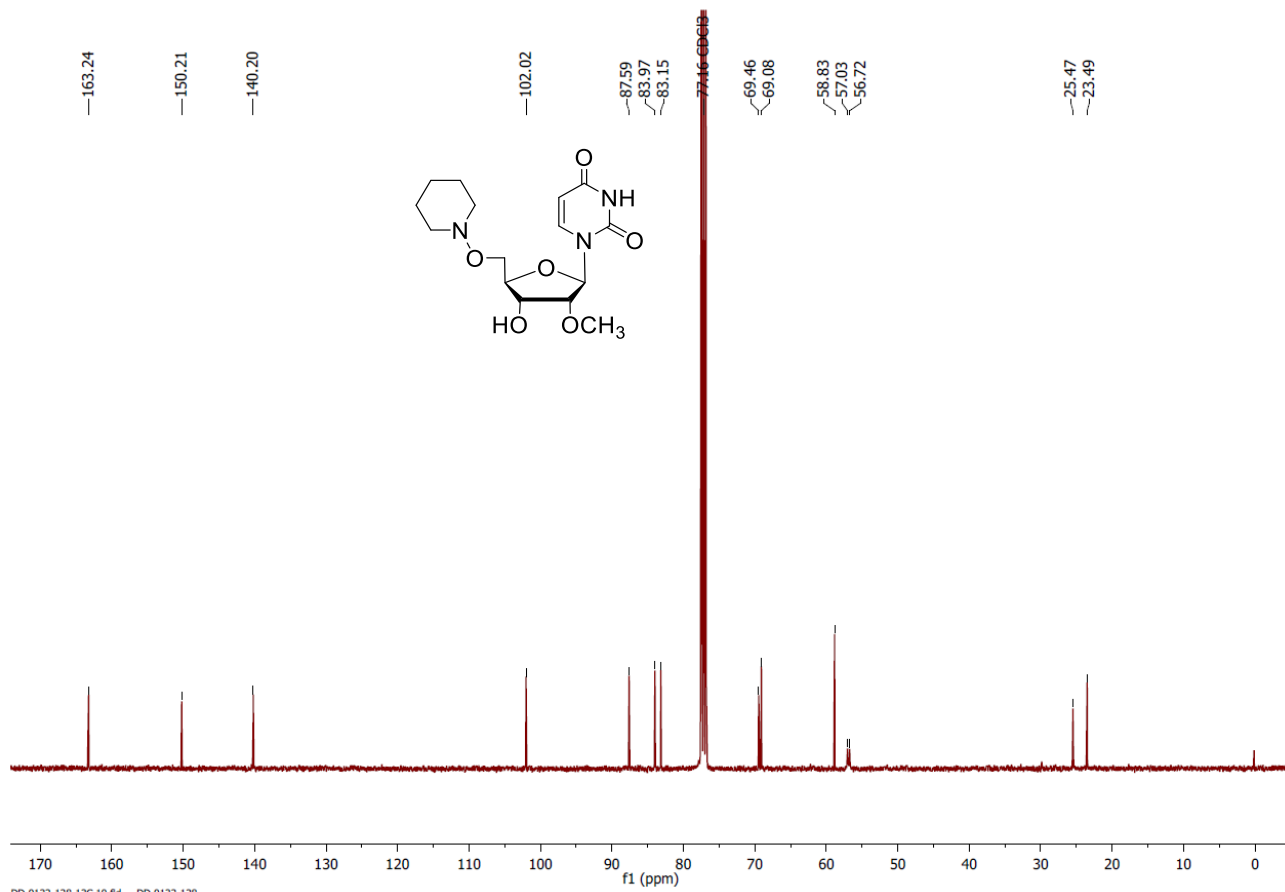

DD-0132-128-13C.10.fid -- DD-0132-128

$^{13}\text{C}$  NMR (101 MHz,  $\text{CDCl}_3$ ) of 12.



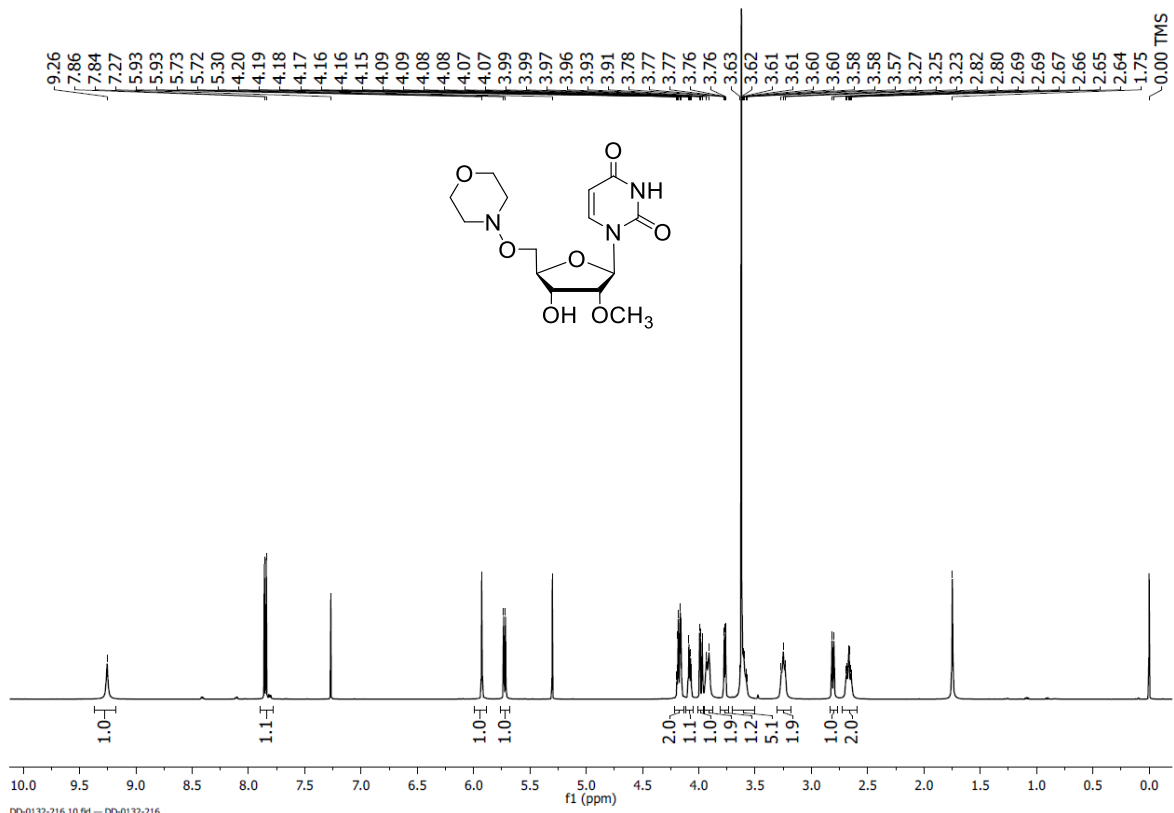

$^1\text{H}$  NMR (500 MHz,  $\text{CDCl}_3$ ) of **13**.

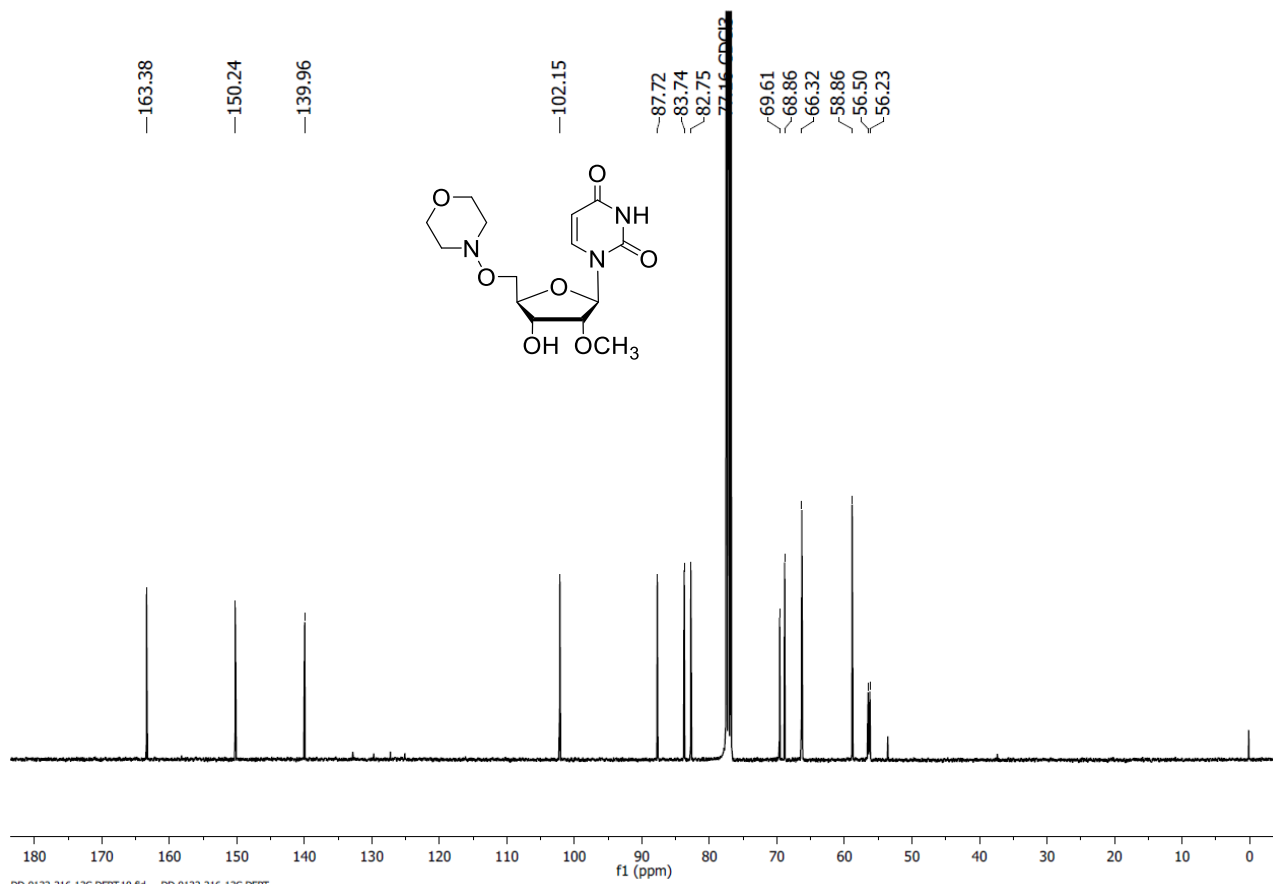

DD-0132-216-13C-DEPT.10.fid - DD-0132-216-13C-DEPT

<sup>13</sup>C NMR (101 MHz, CDCl<sub>3</sub>) of 13.

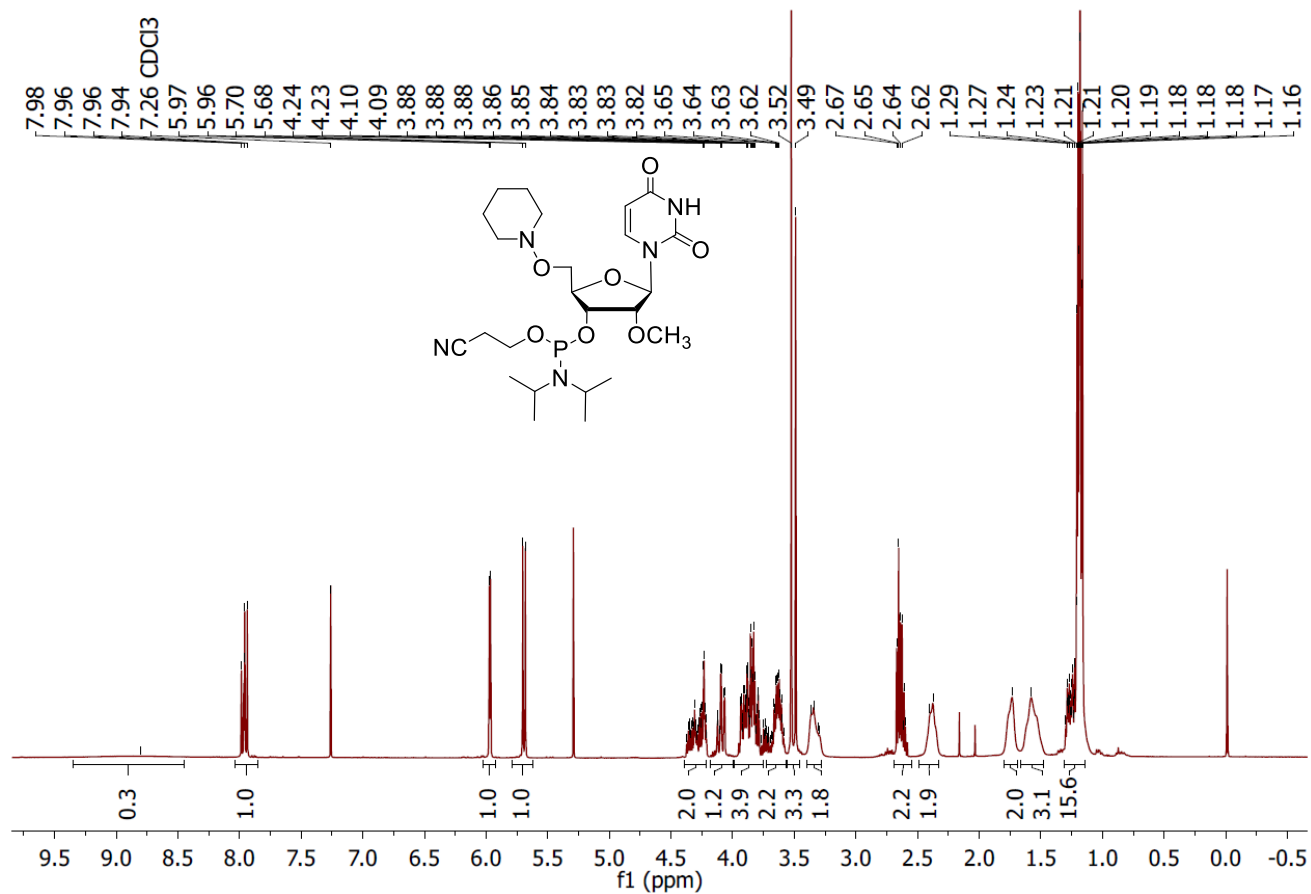

DD-0132-161-06192020.10.fid — DD-0132-161

<sup>1</sup>H NMR (400 MHz, CDCl<sub>3</sub>) of 14.

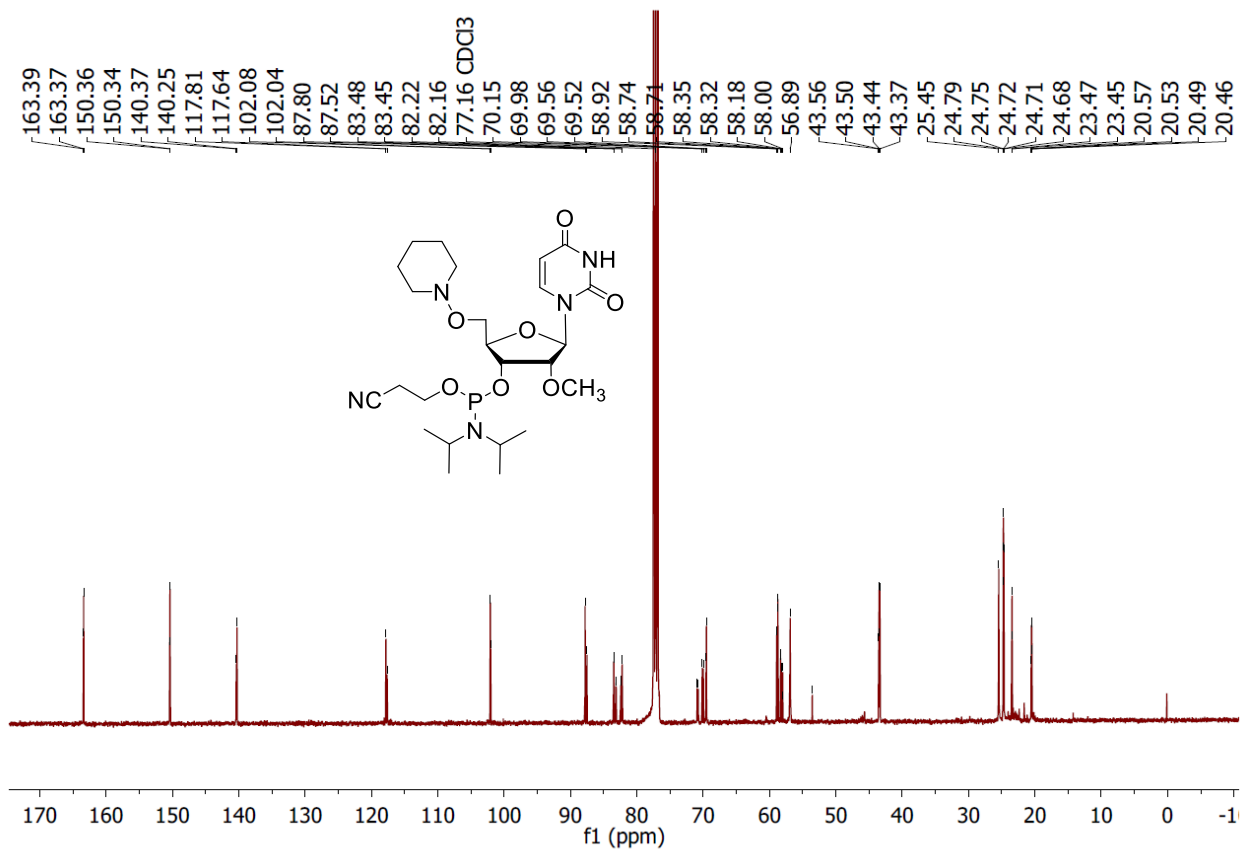

DD-0132-161-13C-06192020.10.fid — DD-0132-161

<sup>13</sup>C NMR (101 MHz, CDCl<sub>3</sub>) of **14**.

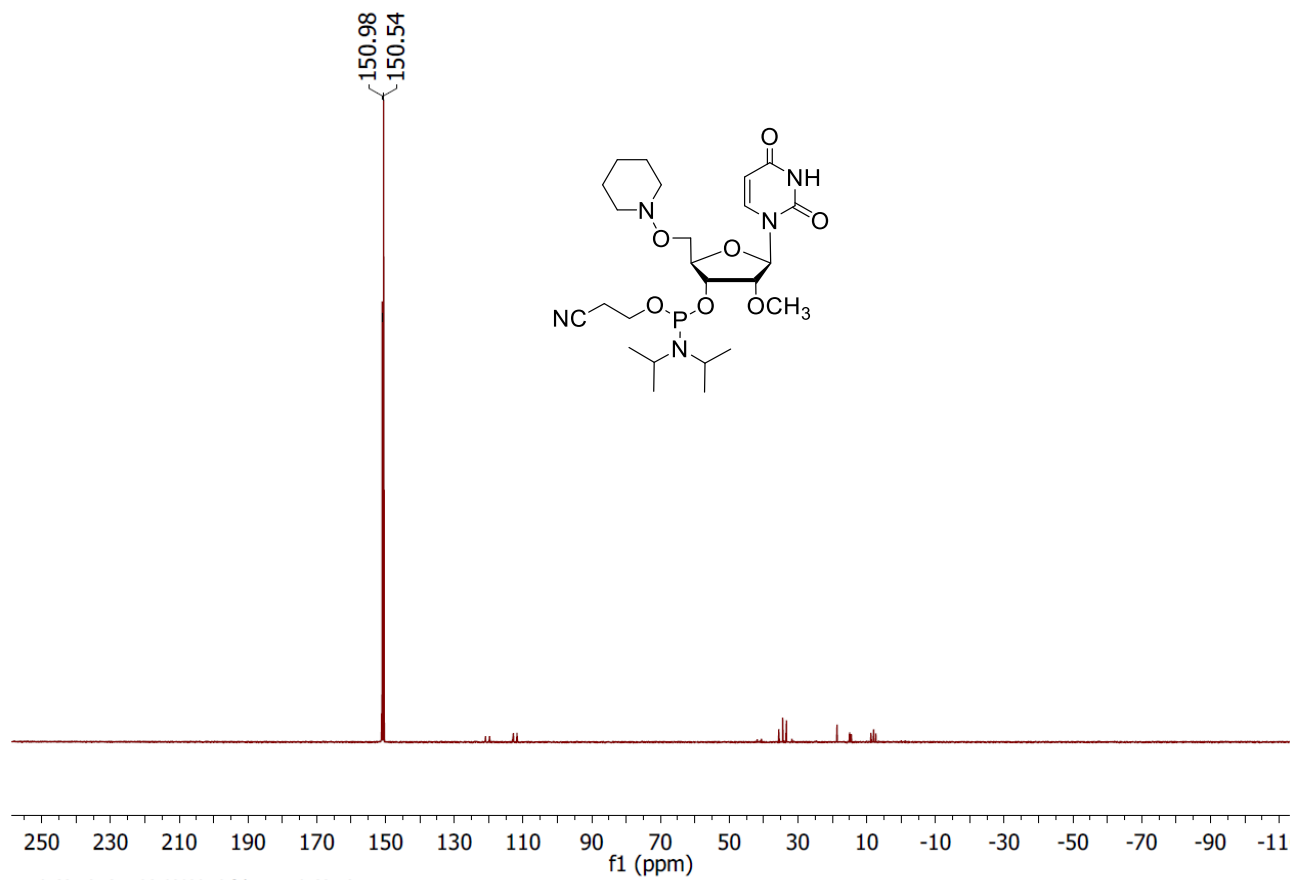

DD-0132-161-31P-06192020.10.fid — DD-0132-161

$^{31}\text{P}$  NMR (162 MHz,  $\text{CDCl}_3$ ) of **14**.

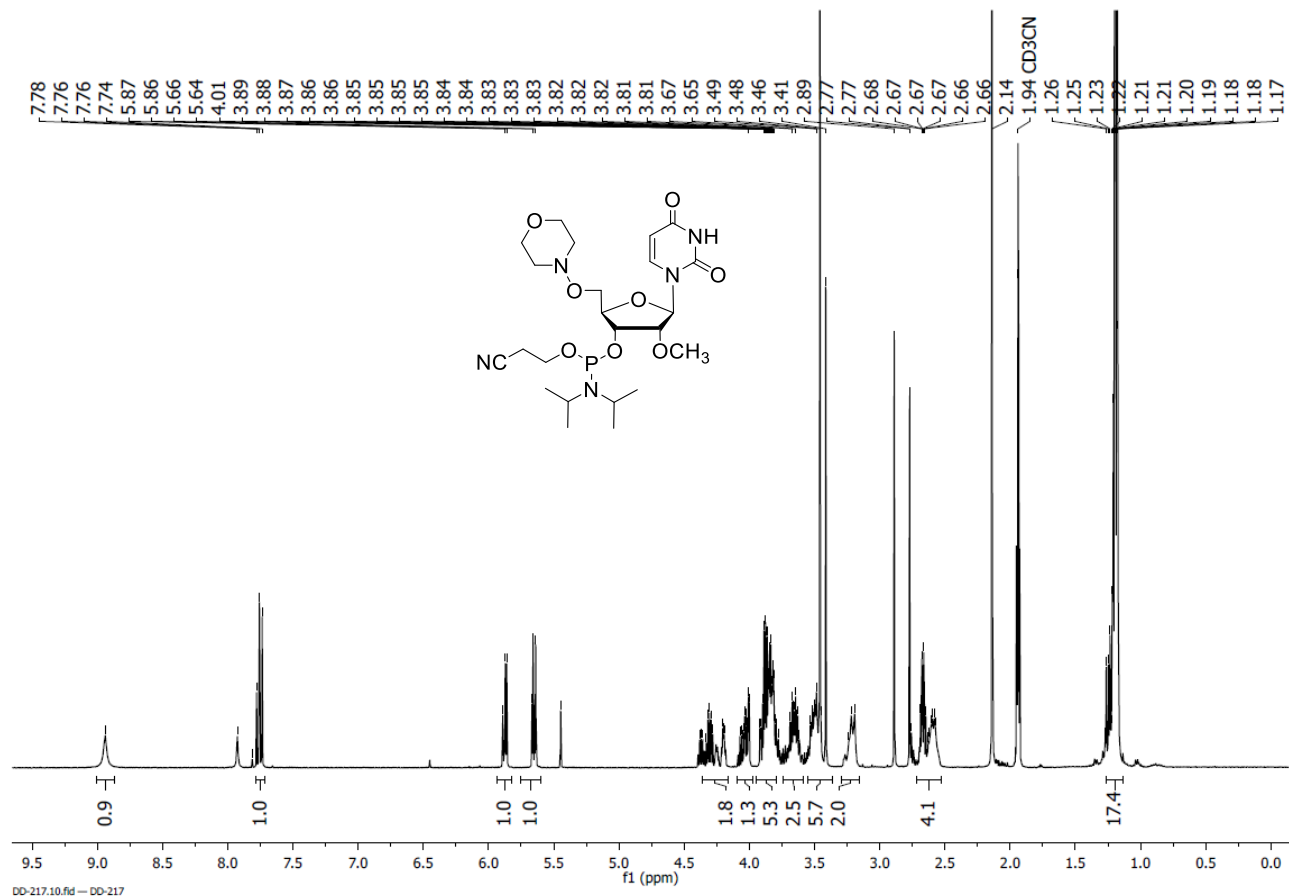

<sup>1</sup>H NMR (400 MHz, CD<sub>3</sub>CN) of 15.

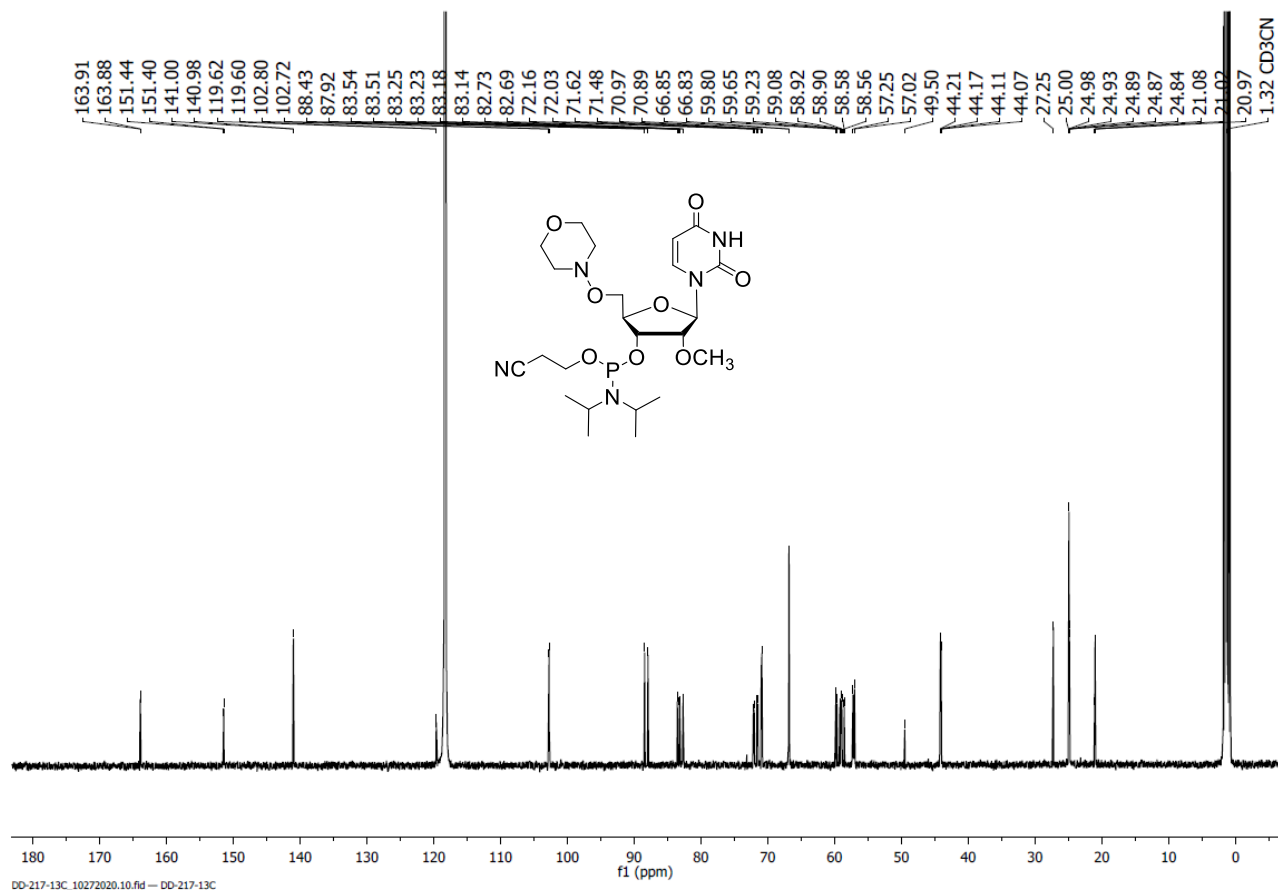

<sup>13</sup>C NMR (126 MHz, CD<sub>3</sub>CN) of **15**.

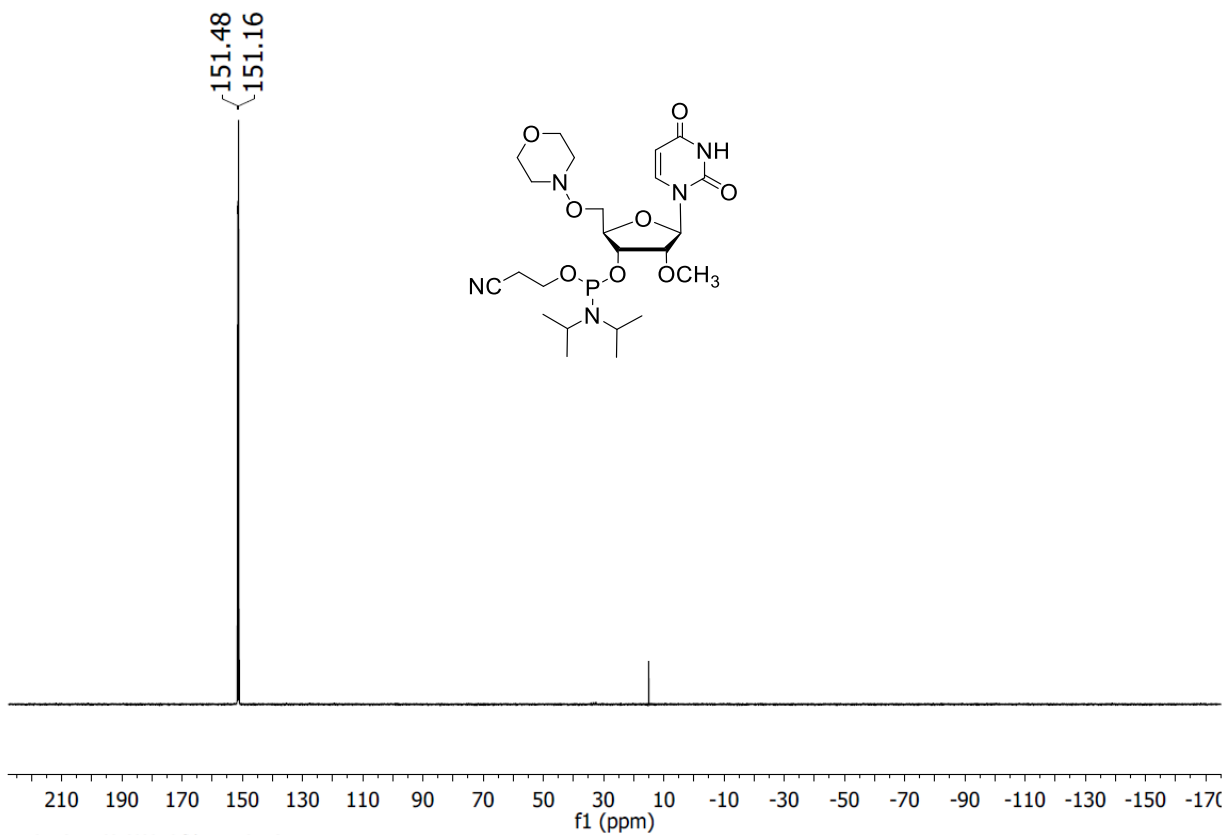

DD-217-31P\_10272020.10.fid — DD-217-31P

$^{31}\text{P}$  NMR (202 MHz,  $\text{CD}_3\text{CN}$ ) of **15**.



## Synthesis of oligonucleotides

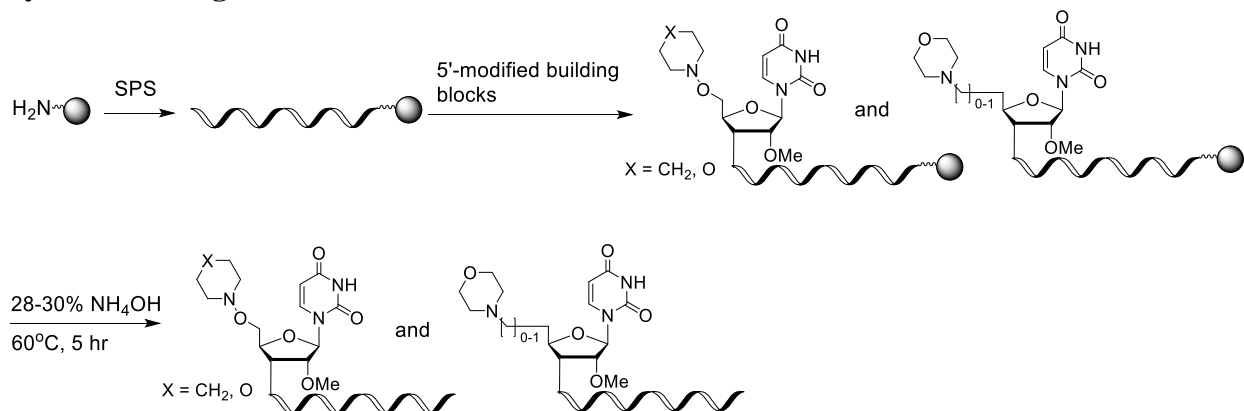

**Figure S1:** Incorporation of modified amidites at the 5'-end of oligonucleotides. SPS indicates solid-phase synthesis.

**Oligonucleotide synthesis and purification:** Oligonucleotides were synthesized on K&A H-8-SE at 40- $\mu$ mol scale using universal supports. A solution of 0.25 M 5-(*S*-ethylthio)-1*H*-tetrazole in acetonitrile ( $\text{CH}_3\text{CN}$ ) was used as the activator. The solutions of commercially available phosphoramidites and synthesized phosphoramidities were used at 0.15 M in anhydrous  $\text{CH}_3\text{CN}$  or  $\text{CH}_2\text{Cl}_2$ . The oxidizing reagent was 0.02 M  $\text{I}_2$  in THF/pyridine/ $\text{H}_2\text{O}$ . *N,N*-Dimethyl-*N'*-(3-thio-3*H*-1,2,4-dithiazol-5-yl)methanimidamide (DDTT) in 0.1 M in pyridine was used as the sulfurizing reagent. The detritylation reagent was 3% dichloroacetic acid in  $\text{CH}_2\text{Cl}_2$ . Waiting times for coupling, capping, oxidation, and sulfurization step were 450 s, 25 s, 80 s, and 300 s, respectively. After completion of the automated synthesis, the oligonucleotide was manually released from support and deprotected using 28-30% ammonium hydroxide solution at 60 °C for 5h.

After filtration through a 0.45- $\mu$ m nylon filter, oligonucleotides were purified by ion exchange and/or reverse phase column chromatography. For ion exchange, a preparative HPLC column custom packed with TSKGel SuperQ-5PW(20) (Sigma) was used. Appropriate gradients of mobile phase (buffer A: 20 mM sodium phosphate, 15%  $\text{CH}_3\text{CN}$ , pH 8.5; buffer B: 1 M NaBr, 20 mM sodium phosphate, 15%  $\text{CH}_3\text{CN}$ , pH 8.5) were employed. Oligonucleotides were desalted using size-exclusion chromatography using a column custom packed with Sephadex G25 (GE Healthcare) and water as an eluent. Oligonucleotides were then quantified by measuring the absorbance at 260 nm. Extinction coefficients were calculated using the following extinction coefficients for each residue: A, 13.86; T/U, 7.92; C, 6.57; and G, 10.53  $\text{M}^{-1}\text{cm}^{-1}$ . The identities of modified oligonucleotides were verified by mass spectrometry, respectively. Sequences and mass spectroscopy data are shown in Table S2. Purities were evaluated by analytical reverse-phase HPLC. For reverse-phase HPLC, a C-18 column was used with a gradient of 2-29% buffer B (buffer A: 95 mM hexafluoroisopropanol, 16.3 mM TEA, 0.05 mM EDTA; buffer B: MeOH) over 39 min.

**Table S2:** Sequences and mass spectroscopy characterization of oligonucleotides.

| Entry             | Sense and antisense strand (5'-3') <sup>a</sup> | Target      | S / AS | Mass (M-H) <sup>-</sup> |         |
|-------------------|-------------------------------------------------|-------------|--------|-------------------------|---------|
|                   |                                                 |             |        | Calcd.                  | Obsd.   |
| ON1               | <b>Mo1</b> ●g●UgAcAaAUuGgGcAuCaAL               | <i>ApoB</i> | S      | 8795.45                 | 8796.14 |
| ON2               | <b>Mo2</b> ●g●UgAcAaAUuGgGcAuCaAL               | <i>ApoB</i> | S      | 8809.48                 | 8809.84 |
| ON3               | <b>Pip</b> ●g●UgAcAaAUuGgGcAuCaAL               | <i>ApoB</i> | S      | 8809.48                 | 8809.76 |
| ON4               | <b>Mo3</b> ●g●UgAcAaAUuGgGcAuCaAL               | <i>ApoB</i> | S      | 8811.45                 | 8811.86 |
| ON5               | u●g●UgAcAaAUuGgGcAuCaAL                         | <i>ApoB</i> | S      | 8726.35                 | 8726.92 |
| ON6               | u●U●gAuGcCcAuauUuGuCaCa●a●a                     | <i>ApoB</i> | AS     | 7530.89                 | 7531.36 |
| ON7               | <b>Mo1</b> ●U●gAuGcCcAuauUuGuCaCa●a●a           | <i>ApoB</i> | AS     | 7599.99                 | 7600.36 |
| ON8               | <b>Mo2</b> ●U●gAuGcCcAuauUuGuCaCa●a●a           | <i>ApoB</i> | AS     | 7614.02                 | 7613.96 |
| ON9               | <b>Pip</b> ●U●gAuGcCcAuauUuGuCaCa●a●a           | <i>ApoB</i> | AS     | 7614.02                 | 7614.23 |
| ON10              | <b>Mo3</b> ●U●gAuGcCcAuauUuGuCaCa●a●a           | <i>ApoB</i> | AS     | 7615.99                 | 7616.39 |
| ON11 <sup>a</sup> | a●a●caguGuUCUugcucuauaaL                        | <i>TTR</i>  | S      | 8685.45                 | 8685.35 |
| ON12 <sup>a</sup> | VPu●U●auaGagcaagaAcAcuguu●u●u                   | <i>TTR</i>  | AS     | 7731.12                 | 7730.80 |
| ON13              | <b>Mo1</b> ●U●auaGagcaagaAcAcuguu●u●u           | <i>TTR</i>  | AS     | 7724.22                 | 7724.68 |
| ON14              | <b>Mo2</b> ●U●auaGagcaagaAcAcuguu●u●u           | <i>TTR</i>  | AS     | 7738.25                 | 7736.78 |
| ON15              | <b>Pip</b> ●U●auaGagcaagaAcAcuguu●u●u           | <i>TTR</i>  | AS     | 7738.25                 | 7738.46 |
| ON16              | <b>Mo3</b> ●U●auaGagcaagaAcAcuguu●u●u           | <i>TTR</i>  | AS     | 7740.22                 | 7739.79 |
| ON17              | <b>Mo2</b> ●u●auaGagcaagaAcAcuguu●u●u           | <i>TTR</i>  | AS     | 7750.28                 | 7749.97 |
| ON18              | u●u●auaGagcaagaAcAcuguu●u●u                     | <i>TTR</i>  | AS     | 7667.15                 | 7667.21 |
| ON19              | <b>Mo2</b> ●u●gAuGcCcAuauUuGuCaCa●a●a           | <i>ApoB</i> | AS     | 7626.05                 | 7626.84 |
| ON20              | u●u●gAuGcCcAuauUuGuCaCa●a●a                     | <i>ApoB</i> | AS     | 7542.92                 | 7542.83 |
| ON21              | <b>Mo2</b> ●G●UgAcAaAUuGgGcAuCaAL               | <i>ApoB</i> | S      | 8795.45                 | 8798.03 |

<sup>a</sup> ON11 and ON12 were synthesized previously.<sup>6</sup>

<sup>b</sup> Chemical modifications are indicated as follows: ●, PS linkage; lower case, 2'-OMe; italicized upper case, 2'-F; L, trivalent-GalNAc.

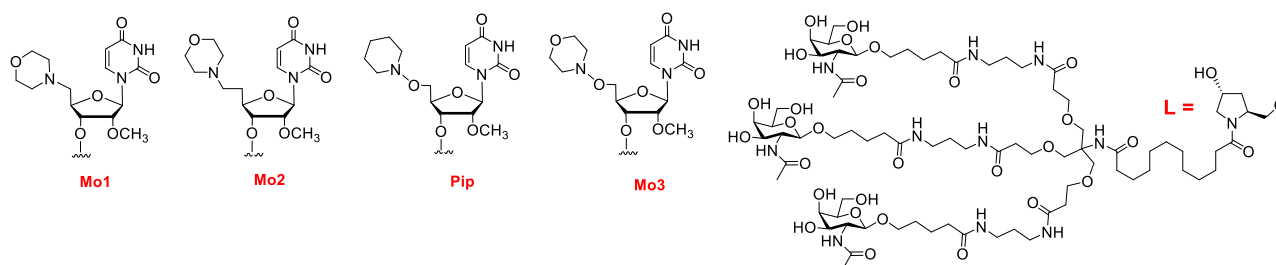

**Figure S2:** Chemical structures of 5'-end modifications and trivalent-GalNAc.

# HPLC chromatograms of oligonucleotides

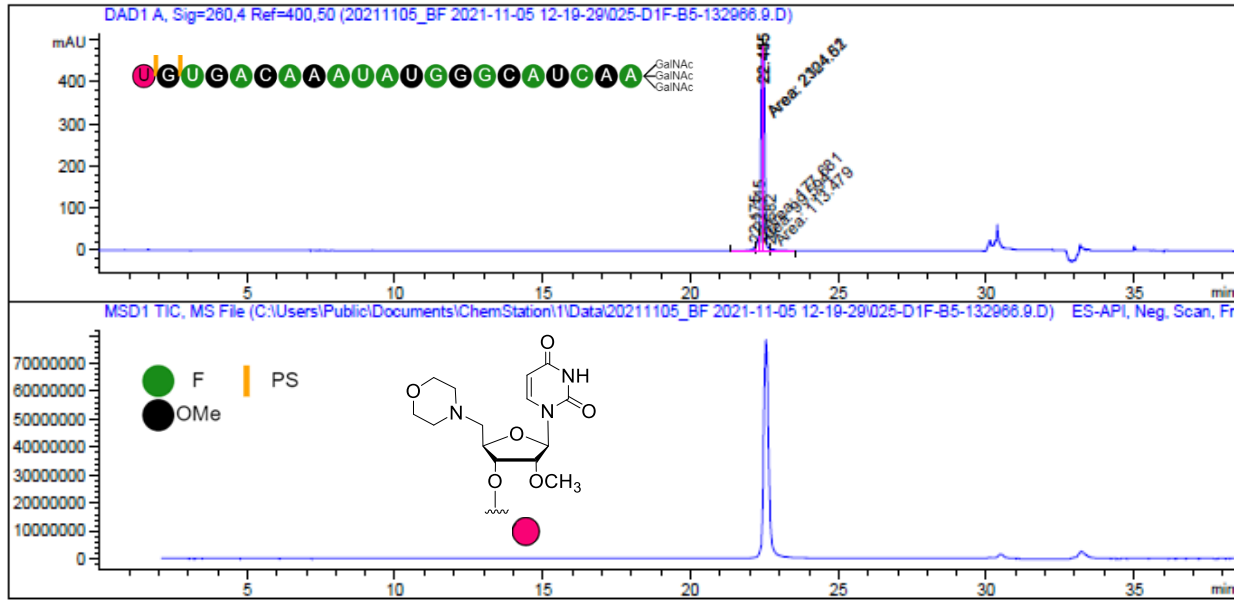

## Area Percent Report

Sorted By : Signal  
Multiplier : 1.0000  
Dilution : 1.0000  
Do not use Multiplier & Dilution Factor with ISTDs

Signal 1: DAD1 A, Sig=260,4 Ref=400,50

File C:\Users\Public\Documents\ChemStation\1\Data\20211105\_BF 2021-11-05 12-19-29\025-D1F-B5-132966.9.D

File Name: 132966.9

| Peak # | RetTime [min] | Type | Width [min] | Area [mAU*s] | Height [mAU] | Area %  |
|--------|---------------|------|-------------|--------------|--------------|---------|
| 1      | 22.175        | MF   | 0.1982      | 99.59399     | 8.37588      | 2.0663  |
| 2      | 22.315        | MF   | 0.0745      | 177.68138    | 39.73951     | 3.6864  |
| 3      | 22.445        | MF   | 0.0785      | 2304.50757   | 489.09137    | 47.8125 |
| 4      | 22.455        | FM   | 0.0720      | 2124.62207   | 491.51886    | 44.0804 |
| 5      | 22.682        | FM   | 0.3589      | 113.47950    | 5.27046      | 2.3544  |

Totals : 4819.88451 1033.99607

Reverse-phase HPLC profile for ON1.

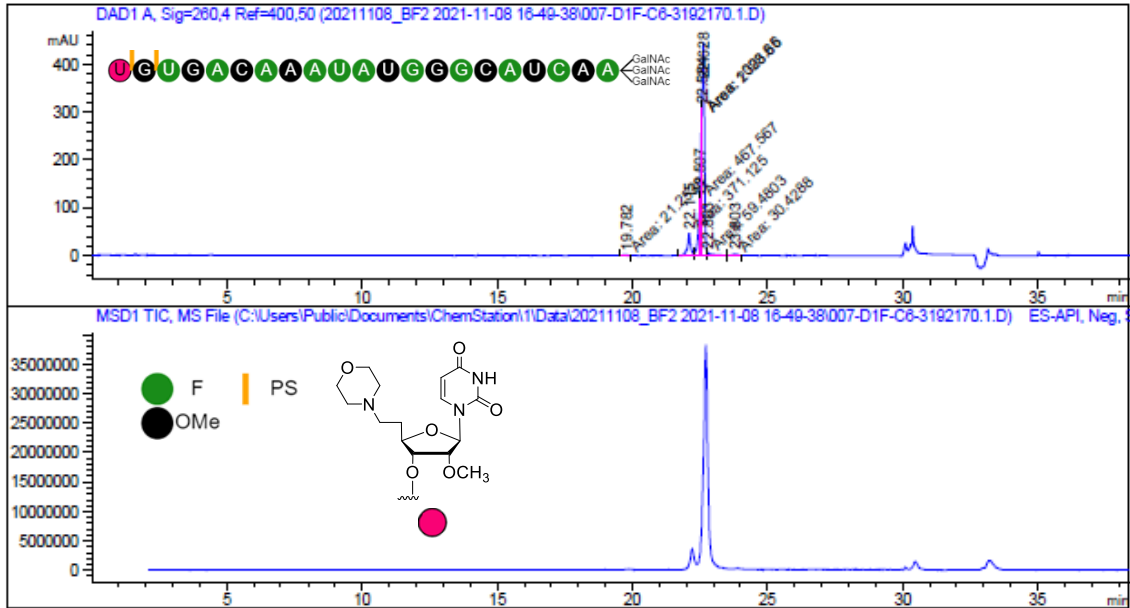

=====  
 Area Percent Report  
 =====

Sorted By : Signal  
 Multiplier : 1.0000  
 Dilution : 1.0000  
 Do not use Multiplier & Dilution Factor with ISTDs

Signal 1: DAD1 A, Sig=260,4 Ref=400,50

| Peak # | RetTime [min] | Type | Width [min] | Area [mAU*s] | Height [mAU] | Area %  |
|--------|---------------|------|-------------|--------------|--------------|---------|
| 1      | 19.782        | MM   | 0.2125      | 21.25385     | 1.66687      | 0.4861  |
| 2      | 22.115        | MF   | 0.1314      | 371.12534    | 47.05932     | 8.4880  |
| 3      | 22.507        | MF   | 0.0659      | 467.56702    | 118.33989    | 10.6937 |
| 4      | 22.584        | MF   | 0.0554      | 1023.65344   | 308.03235    | 23.4119 |

10 Infinity2 LCMS 1 11/9/2021 2:27:45 PM SYSTEM

Page 1 of 2

Sample Name: 3192170.1

| Peak # | RetTime [min] | Type | Width [min] | Area [mAU*s] | Height [mAU] | Area %  |
|--------|---------------|------|-------------|--------------|--------------|---------|
| 5      | 22.628        | FM   | 0.0898      | 2398.86304   | 445.06271    | 54.8641 |
| 6      | 22.803        | MF   | 0.1348      | 59.48031     | 5.23742      | 1.3604  |
| 7      | 23.803        | FM   | 0.1936      | 30.42876     | 2.61963      | 0.6959  |

Totals : 4372.37175 928.01819

Reverse-phase HPLC profile for ON2.

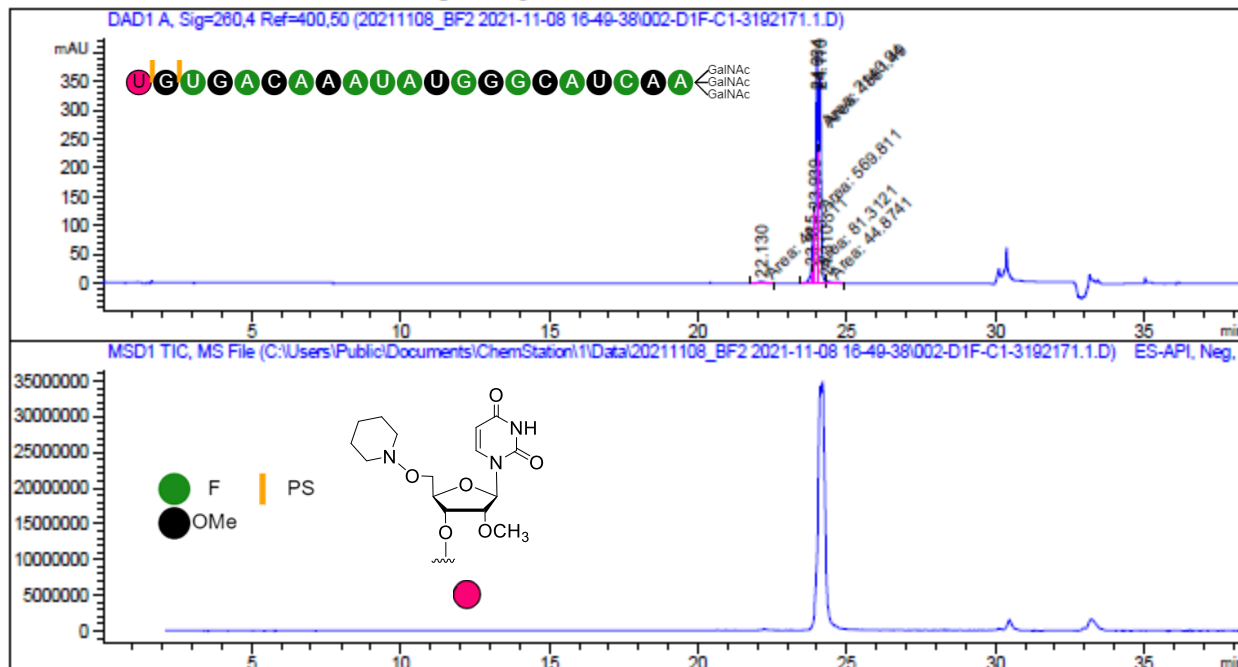

=====  
 Area Percent Report  
 =====

Sorted By : Signal  
 Multiplier : 1.0000  
 Dilution : 1.0000  
 Do not use Multiplier & Dilution Factor with ISTDs

Signal 1: DAD1 A, Sig=260,4 Ref=400,50

| Peak # | RetTime [min] | Type | Width [min] | Area [mAU*s] | Height [mAU] | Area %  |
|--------|---------------|------|-------------|--------------|--------------|---------|
| 1      | 22.130        | MM   | 0.2470      | 48.55107     | 3.27635      | 1.0185  |
| 2      | 23.815        | MF   | 0.0618      | 81.31206     | 21.91688     | 1.7057  |
| 3      | 23.939        | FM   | 0.0798      | 569.81122    | 118.93607    | 11.9533 |
| 4      | 24.004        | MF   | 0.0885      | 2140.94141   | 403.30154    | 44.9119 |
| 5      | 24.110        | MF   | 0.0882      | 1881.48511   | 355.36322    | 39.4692 |
| 6      | 24.310        | FM   | 0.2069      | 44.87410     | 3.61401      | 0.9414  |

Totals : 4766.97496 906.40809

Reverse-phase HPLC profile for ON3.

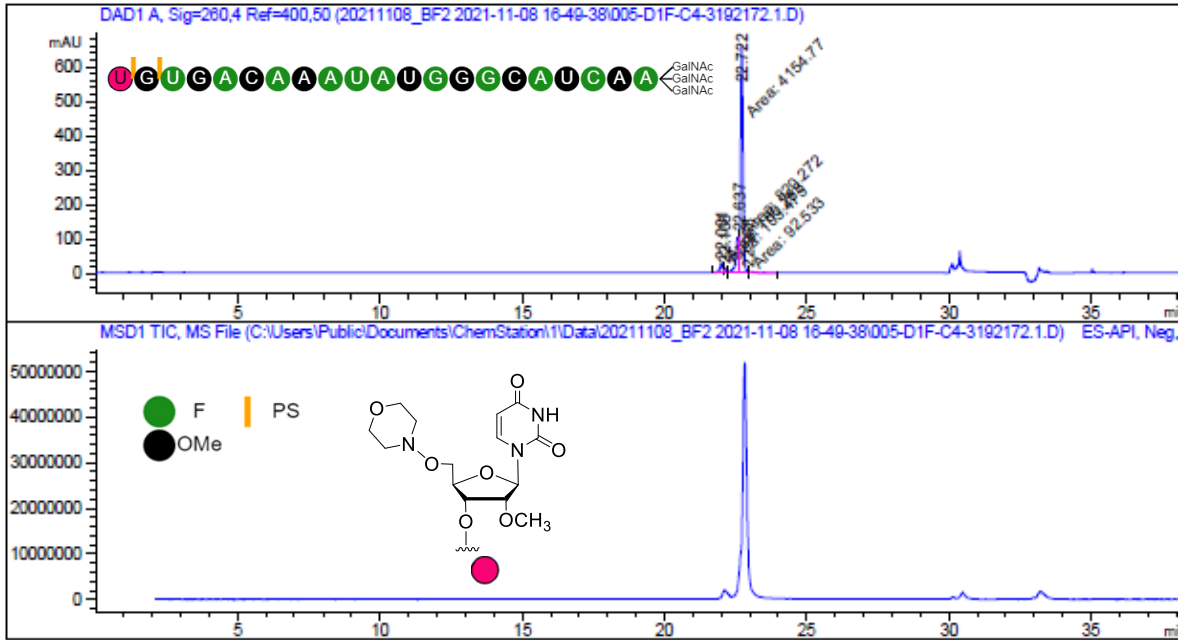

=====  
 Area Percent Report  
 =====

Sorted By : Signal  
 Multiplier : 1.0000  
 Dilution : 1.0000  
 Do not use Multiplier & Dilution Factor with ISTDs

Signal 1: DAD1 A, Sig=260,4 Ref=400,50

| Peak # | RetTime [min] | Type | Width [min] | Area [mAU*s] | Height [mAU] | Area %  |
|--------|---------------|------|-------------|--------------|--------------|---------|
| 1      | 22.001        | MF   | 0.1119      | 180.26251    | 26.86028     | 3.3686  |
| 2      | 22.108        | MF   | 0.1140      | 103.47461    | 15.13394     | 1.9336  |
| 3      | 22.637        | MF   | 0.1291      | 820.27240    | 105.89941    | 15.3284 |
| 4      | 22.722        | FM   | 0.1047      | 4154.76611   | 661.14532    | 77.6402 |

0 Infinity2 LCMS 1 11/9/2021 1:46:14 PM SYSTEM

Page 1 of 2

File C:\Users\Public\Documents\ChemStation\1\Data\20211108\_BF2 2021-11-08 16-49-38\005-D1F-C4-3192172.1.D  
 Sample Name: 3192172.1

| Peak # | RetTime [min] | Type | Width [min] | Area [mAU*s] | Height [mAU] | Area % |
|--------|---------------|------|-------------|--------------|--------------|--------|
| 5      | 22.963        | FM   | 0.3801      | 92.53299     | 4.05743      | 1.7292 |

Totals : 5351.30862 813.09639

Reverse-phase HPLC profile for ON4.

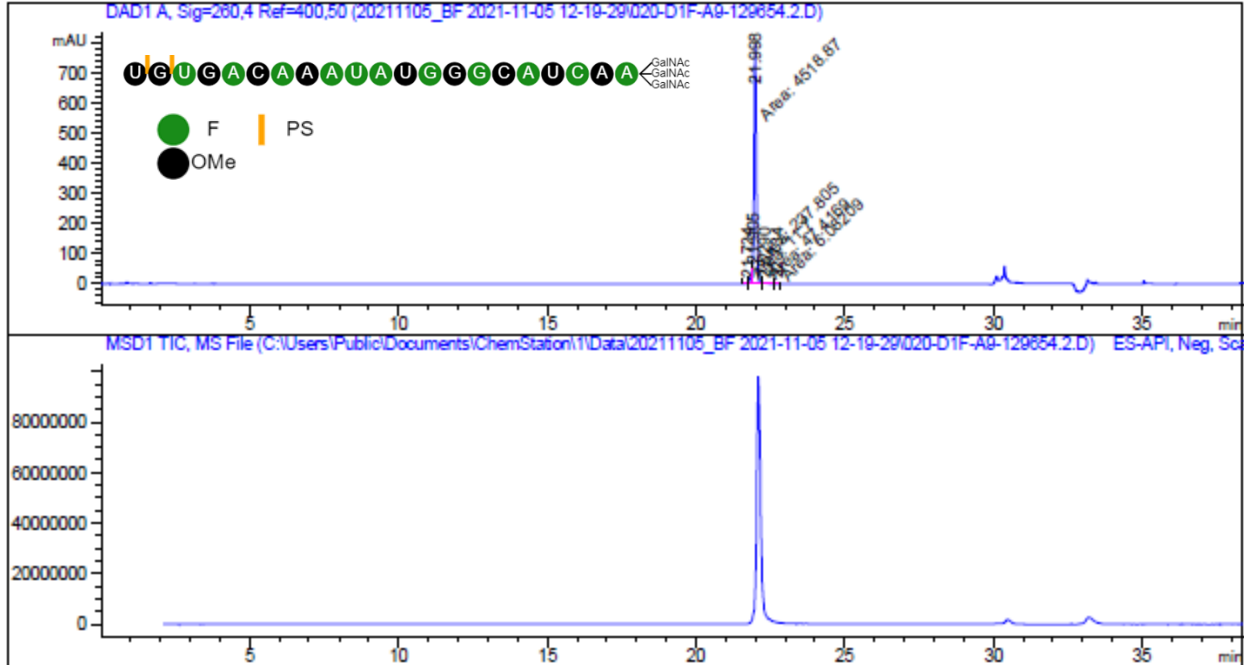

=====  
 Area Percent Report  
 =====

Sorted By : Signal  
 Multiplier : 1.0000  
 Dilution : 1.0000  
 Do not use Multiplier & Dilution Factor with ISTDs

Signal 1: DAD1 A, Sig=260,4 Ref=400,50

| Peak # | RetTime [min] | Type | Width [min] | Area [mAU*s] | Height [mAU] | Area %  |
|--------|---------------|------|-------------|--------------|--------------|---------|
| 1      | 21.724        | MF   | 0.0597      | 11.70004     | 3.26551      | 0.2426  |
| 2      | 21.905        | MF   | 0.0726      | 237.80481    | 54.58926     | 4.9318  |
| 3      | 21.998        | FM   | 0.0944      | 4518.87061   | 798.01074    | 93.7161 |
| 4      | 22.290        | MF   | 0.2165      | 47.41690     | 3.64943      | 0.9834  |
| 5      | 22.734        | FM   | 0.0936      | 6.08209      | 1.08352      | 0.1261  |

) Infinity2 LCMS 1 11/9/2021 11:14:32 AM SYSTEM

Page 1 of 2

File C:\Users\Public\Documents\ChemStation\1\Data\20211105\_BF 2021-11-05 12-19-29\020-D1F-A9-129654.2.D  
 File Name: 129654.2

| Peak #   | RetTime [min] | Type | Width [min] | Area [mAU*s] | Height [mAU] | Area % |
|----------|---------------|------|-------------|--------------|--------------|--------|
| Totals : |               |      |             | 4821.87445   | 860.59846    |        |

Reverse-phase HPLC profile for ON5.

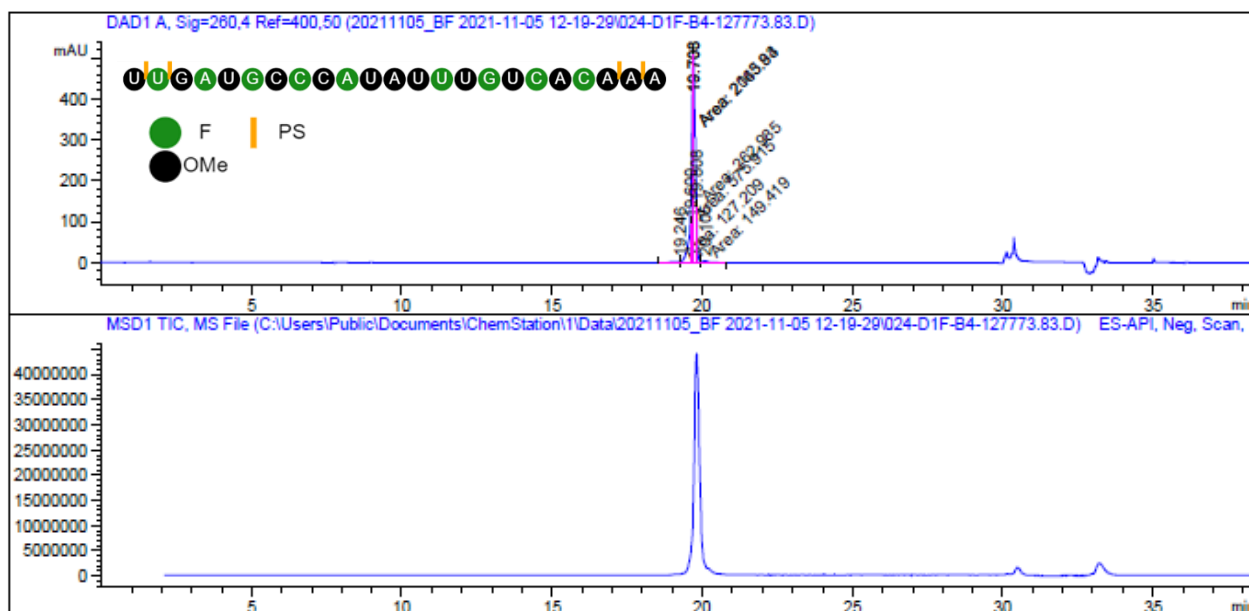

=====  
 Area Percent Report  
 =====

Sorted By : Signal  
 Multiplier : 1.0000  
 Dilution : 1.0000  
 Do not use Multiplier & Dilution Factor with ISTDs

Signal 1: DAD1 A, Sig=260,4 Ref=400,50

File C:\Users\P...ation\1\Data\20211105\_BF 2021-11-05 12-19-29\024-D1F-B4-127773.83.D  
 Sample Name: 127773.83

| Peak # | RetTime [min] | Type | Width [min] | Area [mAU*s] | Height [mAU] | Area %  |
|--------|---------------|------|-------------|--------------|--------------|---------|
| 1      | 19.246        | MF   | 0.4598      | 127.20907    | 4.61089      | 2.3888  |
| 2      | 19.600        | MF   | 0.0974      | 575.91504    | 98.49812     | 10.8147 |
| 3      | 19.703        | MF   | 0.0699      | 2165.92944   | 516.63629    | 40.6725 |
| 4      | 19.708        | MF   | 0.0662      | 2043.83972   | 514.25098    | 38.3798 |
| 5      | 19.808        | FM   | 0.0309      | 262.98508    | 141.66614    | 4.9384  |
| 6      | 20.105        | FM   | 0.3964      | 149.41920    | 6.28218      | 2.8058  |

Totals : 5325.29755 1281.94460

Reverse-phase HPLC profile for ON6.



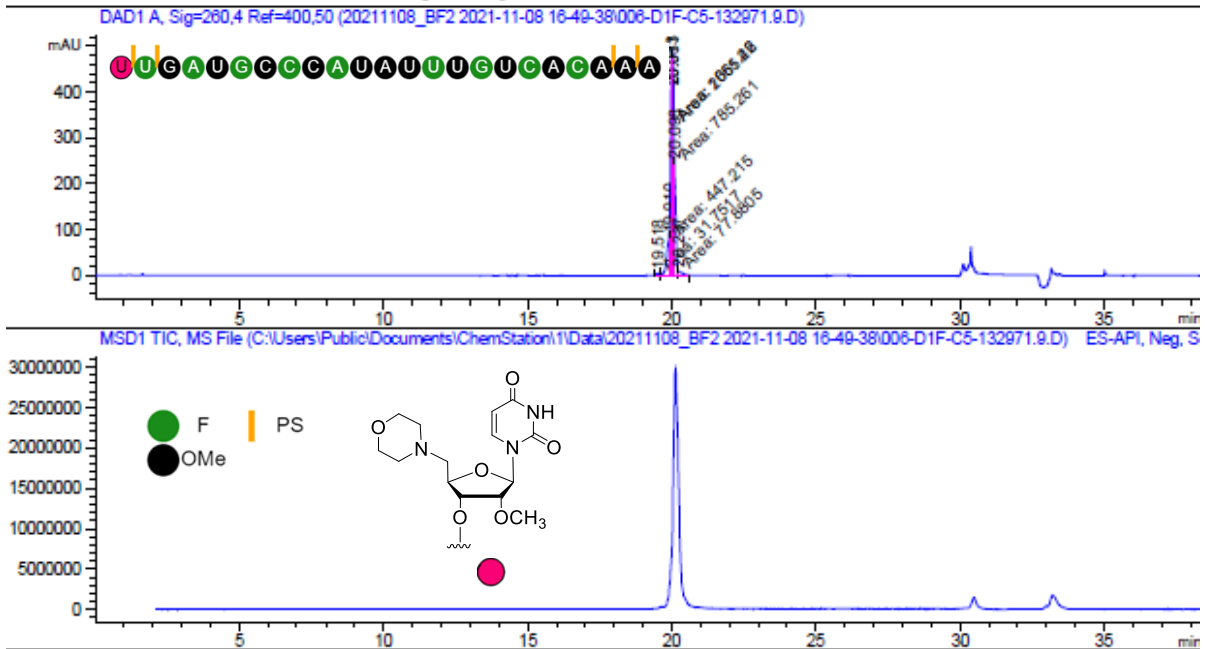

=====  
 Area Percent Report  
 =====

Sorted By : Signal  
 Multiplier : 1.0000  
 Dilution : 1.0000  
 Do not use Multiplier & Dilution Factor with ISTDs

Signal 1: DAD1 A, Sig=260,4 Ref=400,50

| Peak # | RetTime [min] | Type | Width [min] | Area [mAU*s] | Height [mAU] | Area %  |
|--------|---------------|------|-------------|--------------|--------------|---------|
| 1      | 19.518        | MF   | 0.1089      | 31.75174     | 4.86065      | 0.6277  |
| 2      | 19.910        | MF   | 0.0909      | 447.21500    | 81.99804     | 8.8404  |
| 3      | 20.013        | MF   | 0.0578      | 1651.22144   | 476.20313    | 32.6406 |
| 4      | 20.031        | FM   | 0.0693      | 2065.46094   | 496.59372    | 40.8291 |

Infinity2 LCMS 1 11/9/2021 2:14:12 PM SYSTEM

Page 1 of 2

File C:\Users\P...ation\1\Data\20211108\_BF2 2021-11-08 16-49-38\006-D1F-C5-132971.9.D  
 File Name: 132971.9

| Peak # | RetTime [min] | Type | Width [min] | Area [mAU*s] | Height [mAU] | Area %  |
|--------|---------------|------|-------------|--------------|--------------|---------|
| 5      | 20.098        | FM   | 0.0535      | 785.26062    | 244.57695    | 15.5227 |
| 6      | 20.237        | FM   | 0.1561      | 77.88048     | 8.31264      | 1.5395  |

Totals : 5058.79021 1312.54512

Reverse-phase HPLC profile for ON7.

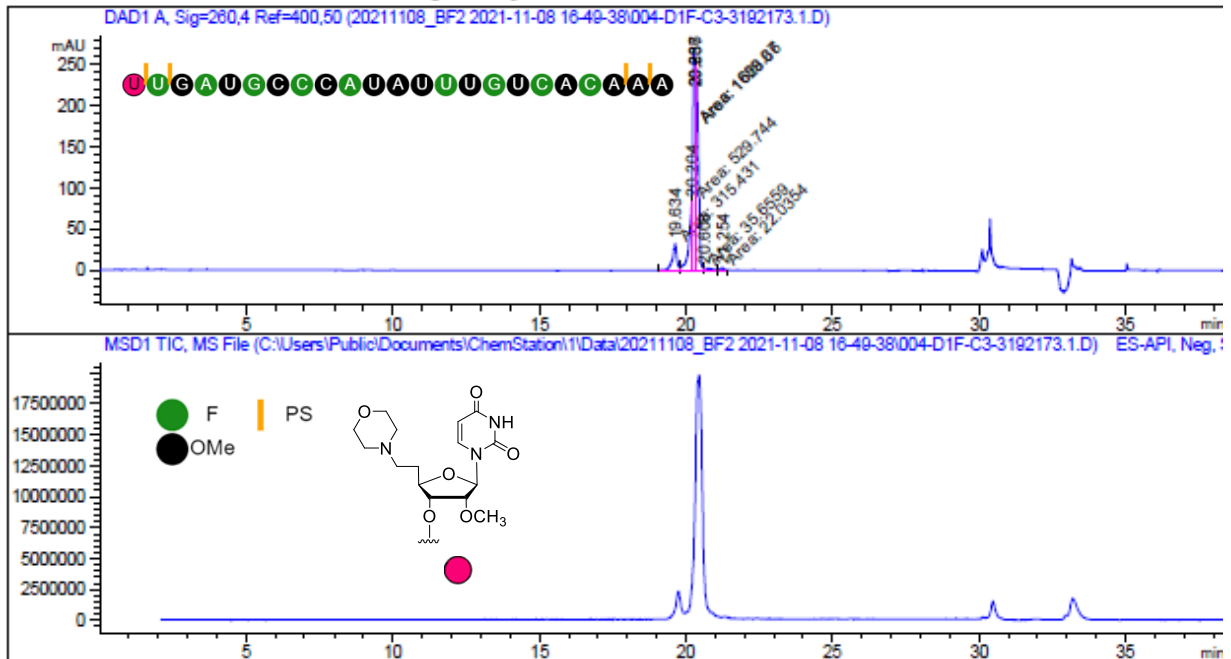

=====  
 Area Percent Report  
 =====

Sorted By : Signal  
 Multiplier : 1.0000  
 Dilution : 1.0000  
 Do not use Multiplier & Dilution Factor with ISTDs

Signal 1: DAD1 A, Sig=260,4 Ref=400,50

| Peak # | RetTime [min] | Type | Width [min] | Area [mAU*s] | Height [mAU] | Area %  |
|--------|---------------|------|-------------|--------------|--------------|---------|
| 1      | 19.634        | MF   | 0.1642      | 315.43073    | 32.02452     | 7.4736  |
| 2      | 20.204        | MF   | 0.1050      | 529.74414    | 84.04922     | 12.5514 |
| 3      | 20.286        | MF   | 0.1046      | 1689.07300   | 269.13748    | 40.0197 |
| 4      | 20.337        | FM   | 0.1089      | 1628.66138   | 249.15331    | 38.5884 |

) Infinity2 LCMS 1 11/9/2021 1:33:45 PM SYSTEM

Page 1 of 2

File C:\Users\Public\Documents\ChemStation\1\Data\20211108\_BF2 2021-11-08 16-49-38004-D1F-C3-3192173.1.D  
 File Name: 3192173.1

| Peak # | RetTime [min] | Type | Width [min] | Area [mAU*s] | Height [mAU] | Area % |
|--------|---------------|------|-------------|--------------|--------------|--------|
| 5      | 20.608        | MF   | 0.1784      | 35.65590     | 2.35028      | 0.8448 |
| 6      | 21.254        | FM   | 0.1286      | 22.03545     | 2.85474      | 0.5221 |

Totals : 4220 60059 639 56956

Reverse-phase HPLC profile for ON8.

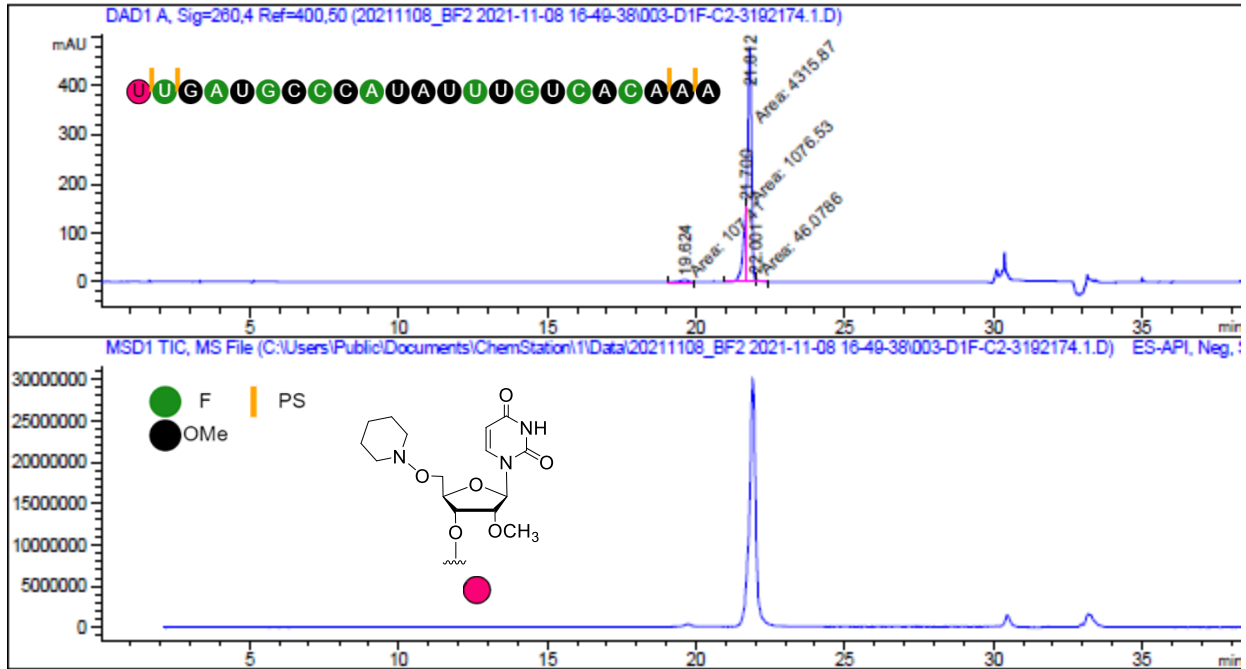

=====  
 Area Percent Report  
 =====

Sorted By : Signal  
 Multiplier : 1.0000  
 Dilution : 1.0000  
 Do not use Multiplier & Dilution Factor with ISTDs

Signal 1: DAD1 A, Sig=260,4 Ref=400,50

| Peak # | RetTime [min] | Type | Width [min] | Area [mAU*s] | Height [mAU] | Area %  |
|--------|---------------|------|-------------|--------------|--------------|---------|
| 1      | 19.624        | MM   | 0.3687      | 107.40978    | 4.85516      | 1.9367  |
| 2      | 21.700        | MF   | 0.1146      | 1076.52722   | 156.55206    | 19.4113 |
| 3      | 21.812        | FM   | 0.1502      | 4315.87061   | 478.88672    | 77.8211 |
| 4      | 22.001        | FM   | 0.1190      | 46.07861     | 6.45469      | 0.8309  |

Infinity2 LCMS 1 11/9/2021 1:20:38 PM SYSTEM

Page 1 of 2

File C:\Users\P...tion\1\Data\20211108\_BF2 2021-11-08 16-49-38\003-D1F-C2-3192174.1.D  
 le Name: 3192174.1

| Peak #   | RetTime [min] | Type | Width [min] | Area [mAU*s] | Height [mAU] | Area % |
|----------|---------------|------|-------------|--------------|--------------|--------|
| Totals : |               |      |             | 5545.88622   | 646.74863    |        |

Reverse-phase HPLC profile for ON9.

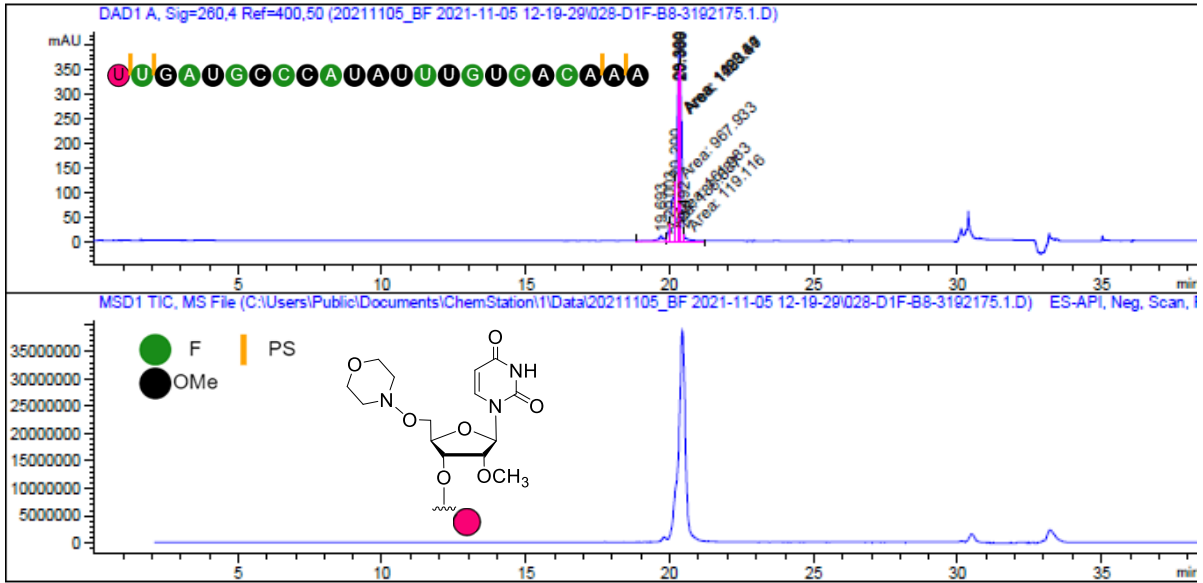

=====  
 Area Percent Report  
 =====

Sorted By : Signal  
 Multiplier : 1.0000  
 Dilution : 1.0000  
 Do not use Multiplier & Dilution Factor with ISTDs

Signal 1: DAD1 A, Sig=260,4 Ref=400,50

Infinity 2 LCMS 2 11/9/2021 9:54:30 AM SYSTEM

Page 1 of 2

File C:\Users\Public\Documents\ChemStation\1\Data\20211105\_BF 2021-11-05 12-19-29\028-D1F-B8-3192175.1.D  
 File Name: 3192175.1

| Peak # | RetTime [min] | Type | Width [min] | Area [mAU*s] | Height [mAU] | Area %  |
|--------|---------------|------|-------------|--------------|--------------|---------|
| 1      | 19.693        | MF   | 0.2818      | 186.88727    | 11.05233     | 3.3210  |
| 2      | 20.003        | MF   | 0.0704      | 161.98346    | 38.36491     | 2.8785  |
| 3      | 20.200        | MF   | 0.1316      | 967.93292    | 122.58730    | 17.2003 |
| 4      | 20.300        | MF   | 0.0689      | 1429.43945   | 345.58673    | 25.4013 |
| 5      | 20.339        | MF   | 0.0616      | 1498.59497   | 405.25439    | 26.6302 |
| 6      | 20.366        | FM   | 0.0583      | 1263.47070   | 360.99738    | 22.4520 |
| 7      | 20.492        | FM   | 0.1205      | 119.11646    | 16.47668     | 2.1167  |

Totals : 5627.42523 1300.31972

Reverse-phase HPLC profile for ON10.

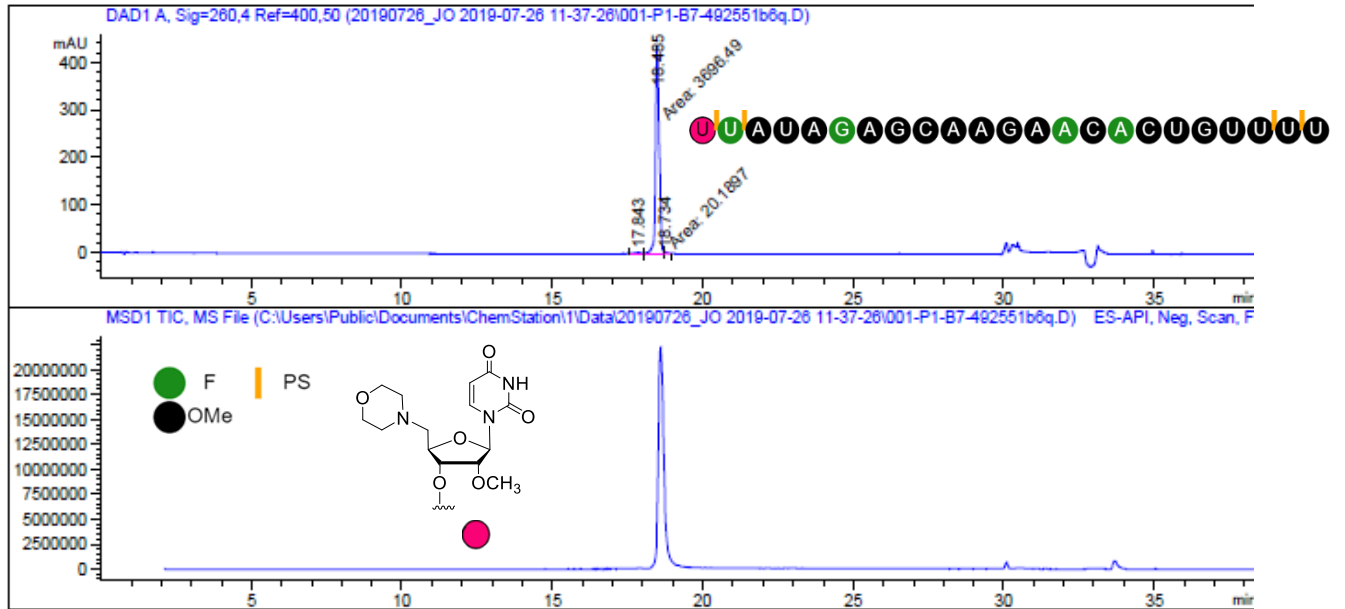

=====  
 Area Percent Report  
 =====

Sorted By : Signal  
 Multiplier : 1.0000  
 Dilution : 1.0000  
 Do not use Multiplier & Dilution Factor with ISTDs

Signal 1: DAD1 A, Sig=260,4 Ref=400,50

7/29/2019 11:01:53 AM SYSTEM

Page 1 of 2

File C:\Users\Public\Documents\ChemStation\1\Data\20190726\_JO 2019-07-26 11-37-26\001-P1-B7-492551b6q.D  
 File Name: 492551b6q

| Peak # | RetTime [min] | Type | Width [min] | Area [mAU*s] | Height [mAU] | Area %  |
|--------|---------------|------|-------------|--------------|--------------|---------|
| 1      | 17.843        | BB   | 0.1357      | 23.22223     | 2.05684      | 0.6209  |
| 2      | 18.485        | MF   | 0.1404      | 3696.49292   | 438.83374    | 98.8392 |
| 3      | 18.734        | MF   | 0.0859      | 20.18972     | 3.91767      | 0.5398  |

Totals : 3739.90487 444.80824

Reverse-phase HPLC profile for ON13.

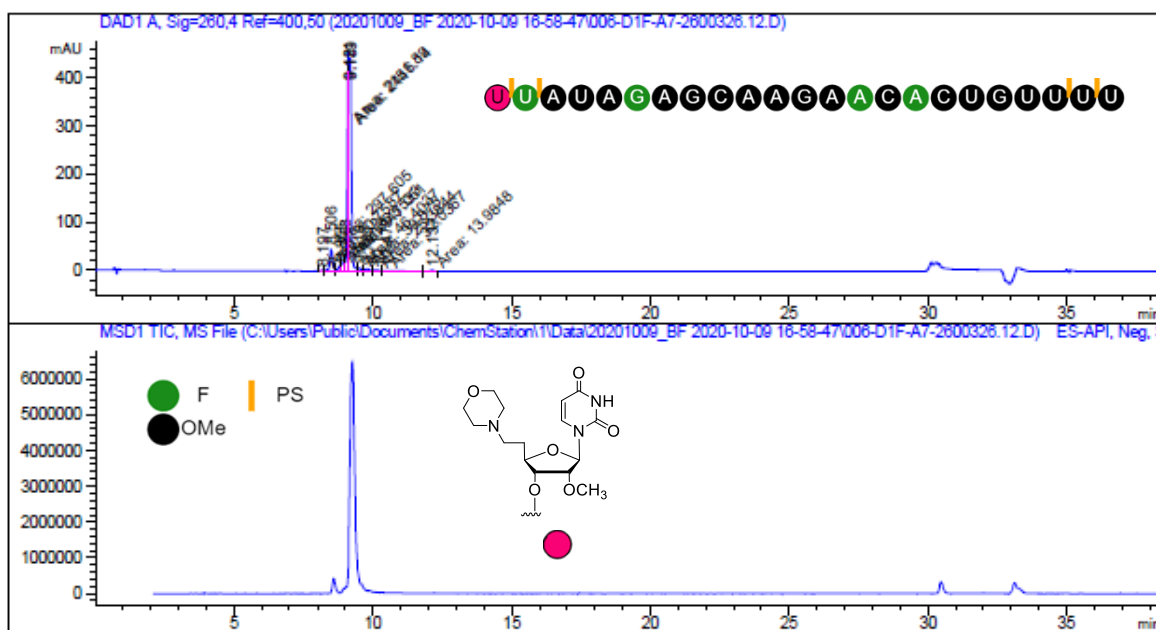

=====  
 Area Percent Report  
 =====

Sorted By : Signal  
 Multiplier : 1.0000  
 Dilution : 1.0000  
 Use Multiplier & Dilution Factor with ISTDs

Signal 1: DAD1 A, Sig=260,4 Ref=400,50

| Peak # | RetTime [min] | Type | Width [min] | Area [mAU*s] | Height [mAU] | Area %  |
|--------|---------------|------|-------------|--------------|--------------|---------|
| 1      | 8.197         | MF   | 0.1410      | 10.75872     | 1.27193      | 0.2039  |
| 2      | 8.506         | MF   | 0.1094      | 297.60480    | 45.32123     | 5.6400  |
| 3      | 8.855         | MF   | 0.0931      | 65.55331     | 11.73782     | 1.2423  |
| 4      | 9.003         | MF   | 0.1289      | 147.05121    | 19.00803     | 2.7868  |
| 5      | 9.121         | MF   | 0.0789      | 2151.89380   | 454.54013    | 40.7812 |

) Infinity 2 LCMS 2 10/13/2020 2:53:33 PM SYSTEM

Page 1 of 2

File C:\Users\Public\Documents\ChemStation\1\Data\20201009\_BF 2020-10-09 16:58:47\006-D1F-A7-2600326.12.D  
 File Name: 2600326.12

| Peak # | RetTime [min] | Type | Width [min] | Area [mAU*s] | Height [mAU] | Area %  |
|--------|---------------|------|-------------|--------------|--------------|---------|
| 6      | 9.189         | FM   | 0.0924      | 2446.13794   | 441.41931    | 46.3575 |
| 7      | 9.516         | MF   | 0.1465      | 46.40366     | 5.27857      | 0.8794  |
| 8      | 9.789         | MF   | 0.1688      | 39.87500     | 3.93666      | 0.7557  |
| 9      | 10.123        | MF   | 0.3016      | 25.38440     | 1.40286      | 0.4811  |
| 10     | 10.478        | MF   | 0.6417      | 32.03666     | 8.32079e-1   | 0.6071  |
| 11     | 12.137        | FM   | 0.1551      | 13.98477     | 1.50238      | 0.2650  |

Reverse-phase HPLC profile for ON14.

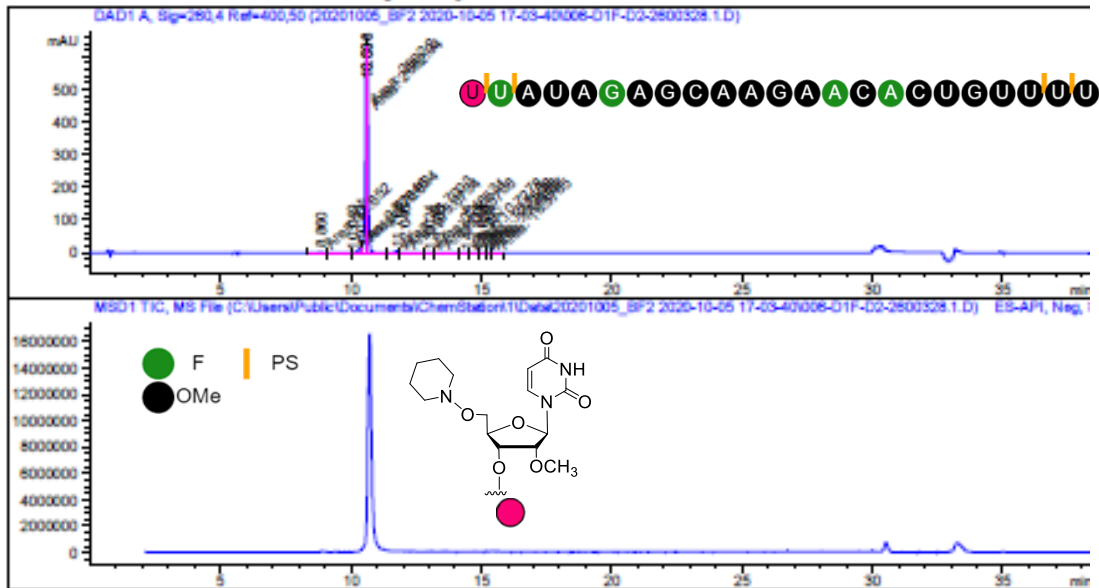

Area Percent Report

Sorted By : Signal  
Multiplier : 1.0000  
Dilution : 1.0000  
Do not use Multiplier & Dilution Factor with ISTDs

Signal 1: DAD1 A, Sig=260,4 Ref=400,50

| Peak # | RetTime [min] | Type | Width [min] | Area [nAU*s] | Height [nAU] | Area %  |
|--------|---------------|------|-------------|--------------|--------------|---------|
| 1      | 8.860         | MF   | 0.2515      | 31.65199     | 2.09716      | 0.5693  |
| 2      | 10.049        | MF   | 0.2696      | 9.02646      | 5.58036e-1   | 0.1624  |
| 3      | 10.431        | MF   | 0.1220      | 176.69440    | 24.14326     | 3.1781  |
| 4      | 10.598        | MF   | 0.0652      | 2502.20288   | 639.62335    | 45.0052 |

) Infinity2 LCMS 1 10/6/2020 11:54:45 AM SYSTEM

Page 1 of 2

File C:\Users\Public\Documents\ChemStation\11\Deba\20201005\_BF2 2020-10-05 17-03-40\006-D1F-D2-2600328.1.D  
File Name: 2600328.1

| Peak # | RetTime [min] | Type | Width [min] | Area [nAU*s] | Height [nAU] | Area %  |
|--------|---------------|------|-------------|--------------|--------------|---------|
| 5      | 10.601        | FM   | 0.0699      | 2682.03931   | 639.20264    | 48.2397 |
| 6      | 11.765        | MF   | 0.1600      | 46.70032     | 4.86473      | 0.8400  |
| 7      | 12.046        | FM   | 0.5437      | 15.67338     | 4.80433e-1   | 0.2819  |
| 8      | 13.024        | FM   | 0.1316      | 7.48531      | 9.48274e-1   | 0.1346  |
| 9      | 13.403        | FM   | 0.1559      | 15.57684     | 1.66548      | 0.2802  |
| 10     | 14.424        | MF   | 0.2091      | 10.72783     | 8.55247e-1   | 0.1930  |
| 11     | 14.833        | MF   | 0.2724      | 15.75657     | 9.64212e-1   | 0.2834  |
| 12     | 15.058        | MF   | 0.1675      | 15.91831     | 1.58380      | 0.2863  |
| 13     | 15.268        | MF   | 0.1409      | 11.78071     | 1.39362      | 0.2119  |
| 14     | 15.541        | FM   | 0.2230      | 18.57848     | 1.38881      | 0.3342  |

Reverse-phase HPLC profile for ON15.

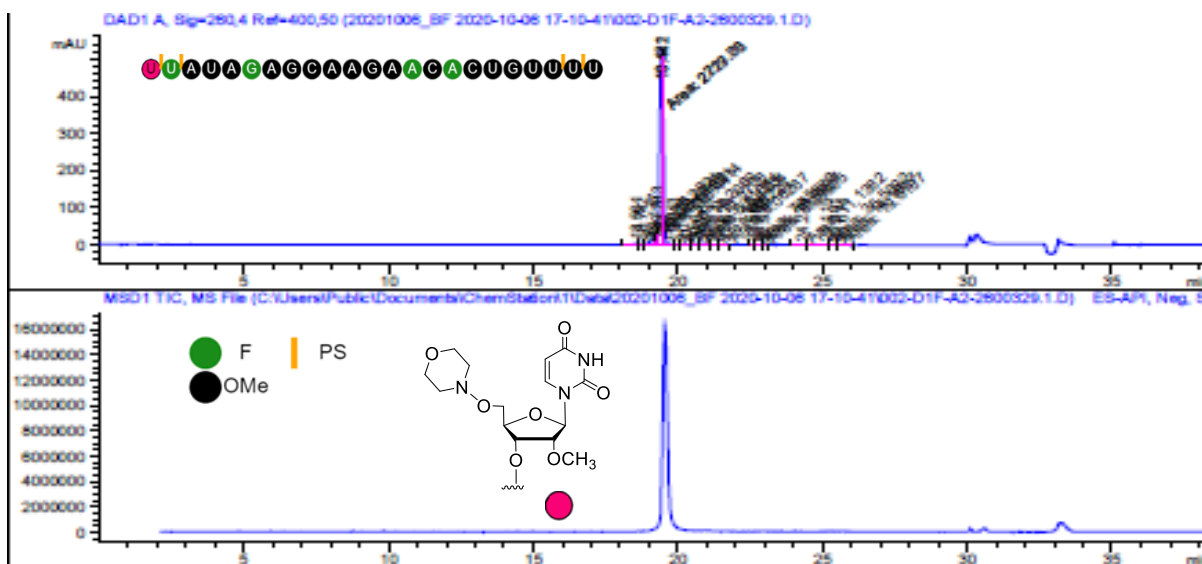

Area Percent Report

Sorted By : Signal  
Multiplier : 1.0000  
Dilution : 1.0000  
Do not use Multiplier & Dilution Factor with ISTDs

Signal 1: DAD1 A, Sig=260,4 Ref=400,50

| Peak # | RetTime [min] | Type | Width [min] | Area [mAU*s] | Height [mAU] | Area %  |
|--------|---------------|------|-------------|--------------|--------------|---------|
| 1      | 18.561        | MF   | 0.1592      | 36.28238     | 3.79760      | 0.6588  |
| 2      | 18.742        | MF   | 0.1651      | 28.57434     | 2.88428      | 0.5188  |
| 3      | 19.147        | MF   | 0.1573      | 126.44148    | 13.39763     | 2.2959  |
| 4      | 19.283        | MF   | 0.0974      | 174.01414    | 29.77535     | 3.1597  |
| 5      | 19.421        | FM   | 0.0849      | 2719.76221   | 533.95935    | 49.3846 |
| 6      | 19.442        | FM   | 0.0729      | 2227.03174   | 509.33322    | 40.4377 |
| 7      | 19.843        | MF   | 0.1583      | 11.20692     | 1.18016      | 0.2035  |
| 8      | 20.173        | MF   | 0.2157      | 15.57080     | 1.20333      | 0.2827  |

Infinity2 LCMS 1 10/7/2020 9:56:15 AM SYSTEM

Page 1 of 2

File C:\Users\Public\Documents\ChemStation\1\Data\20201006\_BF 2020-10-06 17-10-41\002-D1F-A2-2600329.1.D  
File Name: 2600329.1

| Peak # | RetTime [min] | Type | Width [min] | Area [mAU*s] | Height [mAU] | Area % |
|--------|---------------|------|-------------|--------------|--------------|--------|
| 9      | 20.633        | MF   | 0.2348      | 8.11664      | 5.76195e-1   | 0.1474 |
| 10     | 20.861        | FM   | 0.1636      | 40.42041     | 4.11726      | 0.7339 |
| 11     | 21.237        | MF   | 0.1889      | 6.92250      | 6.10841e-1   | 0.1257 |
| 12     | 21.628        | MF   | 0.2338      | 8.06267      | 5.74648e-1   | 0.1464 |
| 13     | 22.562        | MF   | 0.1428      | 7.45579      | 8.70007e-1   | 0.1354 |
| 14     | 22.759        | MF   | 0.1625      | 10.99369     | 1.12745      | 0.1996 |
| 15     | 22.938        | FM   | 0.1608      | 5.99905      | 6.21815e-1   | 0.1089 |
| 16     | 24.279        | MF   | 0.2766      | 11.13817     | 6.71229e-1   | 0.2022 |

Reverse-phase HPLC profile for ON16.



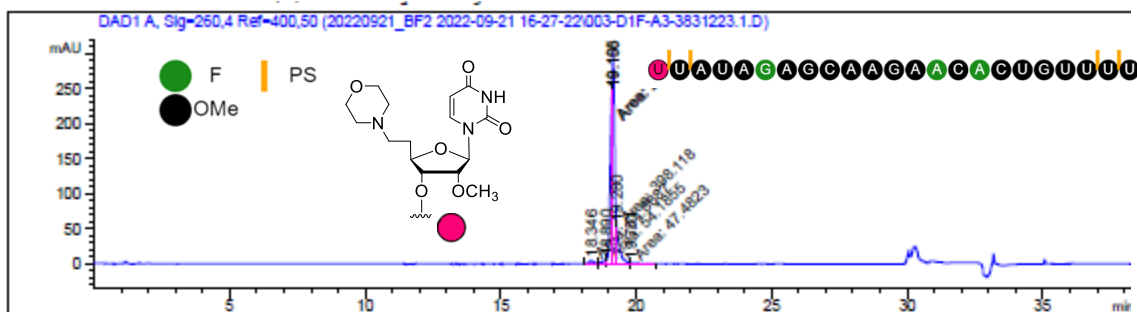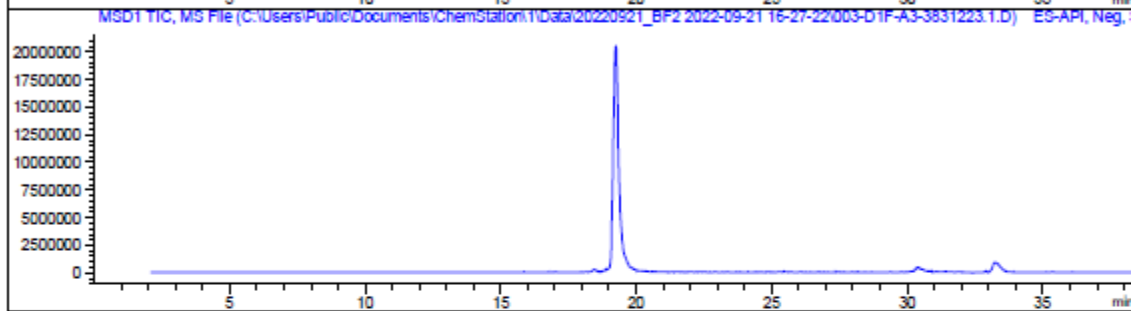

=====  
 Area Percent Report  
 =====

Sorted By : Signal  
 Multiplier : 1.0000  
 Dilution : 1.0000  
 Do not use Multiplier & Dilution Factor with ISTDs

Signal 1: DAD1 A, Sig=260,4 Ref=400,50

| Peak # | RetTime [min] | Type | Width [min] | Area [mAU*s] | Height [mAU] | Area %  |
|--------|---------------|------|-------------|--------------|--------------|---------|
| 1      | 18.346        | MF   | 0.2036      | 54.86871     | 4.49061      | 1.4317  |
| 2      | 18.890        | MF   | 0.1727      | 54.18547     | 5.23053      | 1.4138  |
| 3      | 19.105        | MF   | 0.0739      | 1114.96838   | 251.36119    | 29.0922 |
| 4      | 19.156        | MF   | 0.1181      | 2162.90601   | 305.14639    | 56.4355 |

Data File C:\Users\Public\Documents\ChemStation\1\Data\20220921\_BF2 2022-09-21 16-27-22\003-D1F-A3-3831223.1.D  
 Sample Name: 3831223.1

| Peak #   | RetTime [min] | Type | Width [min] | Area [mAU*s] | Height [mAU] | Area %  |
|----------|---------------|------|-------------|--------------|--------------|---------|
| 5        | 19.280        | FM   | 0.1212      | 398.11752    | 54.73122     | 10.3879 |
| 6        | 19.781        | FM   | 0.4539      | 47.48226     | 1.74365      | 1.2389  |
| Totals : |               |      |             | 3892.52835   | 622.70360    |         |

Reverse-phase HPLC profile for ON17.

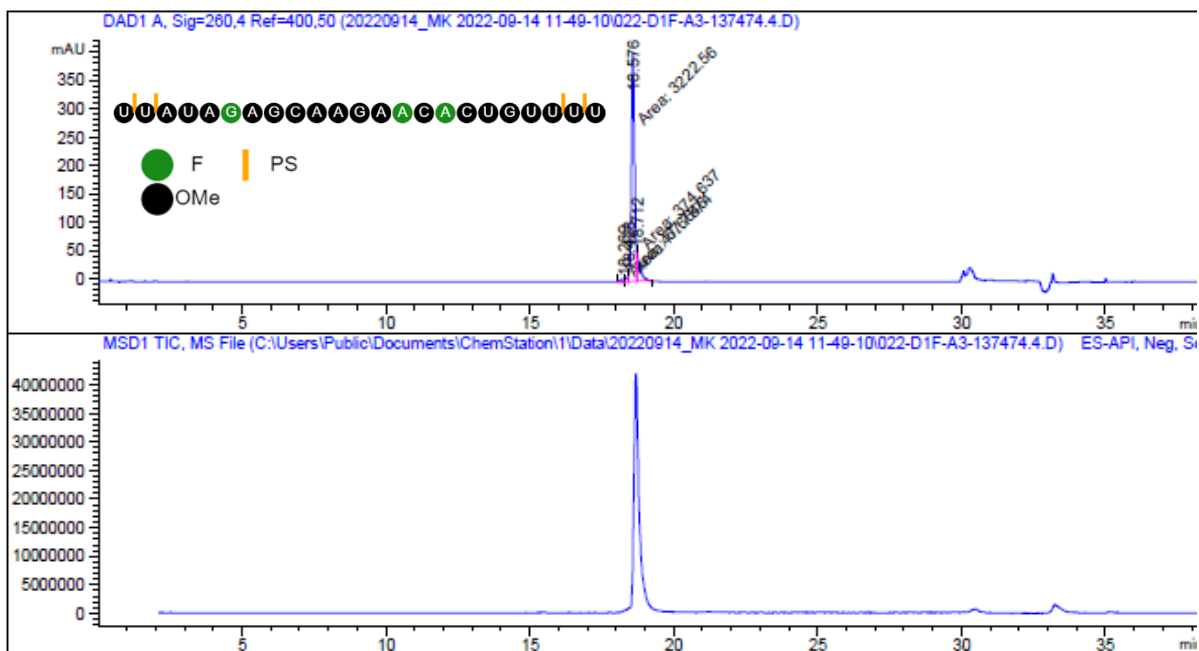

=====  
 Area Percent Report  
 =====

Sorted By : Signal  
 Multiplier : 1.0000  
 Dilution : 1.0000  
 Do not use Multiplier & Dilution Factor with ISTDs

Signal 1: DAD1 A, Sig=260,4 Ref=400,50

| Peak # | RetTime [min] | Type | Width [min] | Area [mAU*s] | Height [mAU] | Area %  |
|--------|---------------|------|-------------|--------------|--------------|---------|
| 1      | 18.269        | MF   | 0.1659      | 47.66455     | 4.78804      | 1.2839  |
| 2      | 18.428        | MF   | 0.1056      | 67.75739     | 10.69532     | 1.8251  |
| 3      | 18.576        | MF   | 0.1328      | 3222.56177   | 404.33585    | 86.8002 |
| 4      | 18.712        | FM   | 0.1187      | 374.63724    | 52.60560     | 10.0909 |

Reverse-phase HPLC profile for **ON18**.

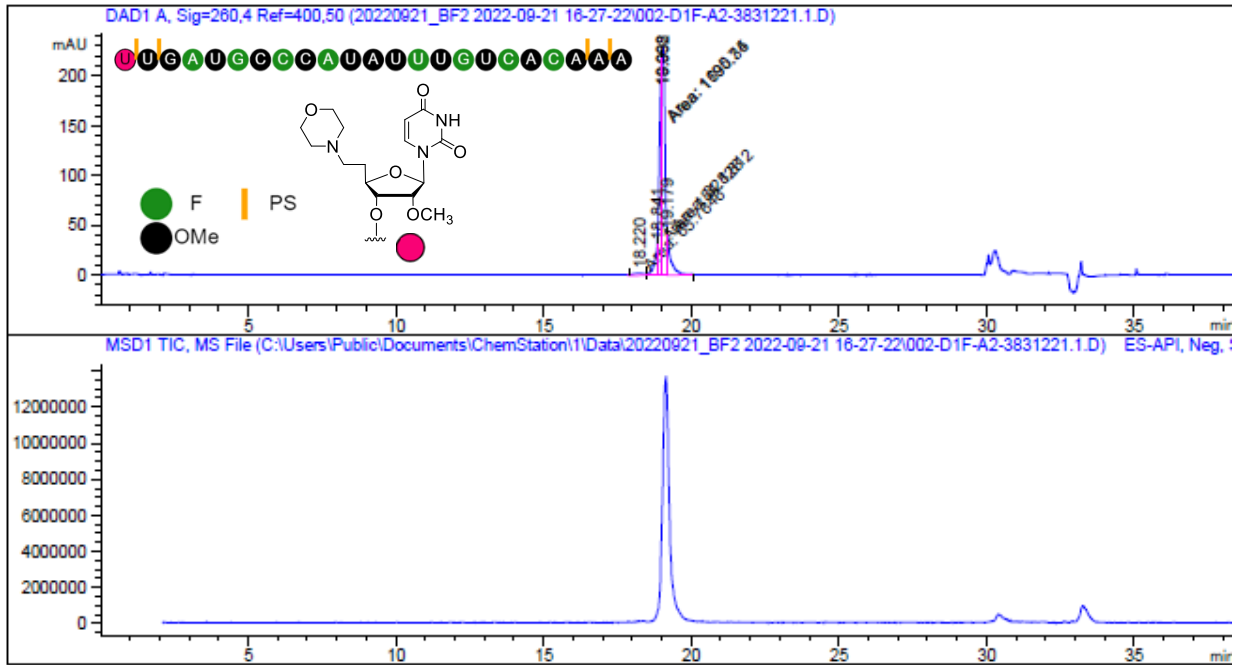

=====  
 Area Percent Report  
 =====

Sorted By : Signal  
 Multiplier : 1.0000  
 Dilution : 1.0000  
 Do not use Multiplier & Dilution Factor with ISTDs

Signal 1: DAD1 A, Sig=260,4 Ref=400,50

| Peak # | RetTime [min] | Type | Width [min] | Area [mAU*s] | Height [mAU] | Area %  |
|--------|---------------|------|-------------|--------------|--------------|---------|
| 1      | 18.220        | MF   | 0.4364      | 65.76465     | 2.51170      | 1.8981  |
| 2      | 18.841        | MF   | 0.0988      | 184.12778    | 31.06525     | 5.3142  |
| 3      | 18.998        | MF   | 0.0914      | 1195.73523   | 218.11739    | 34.5110 |
| 4      | 19.032        | FM   | 0.1228      | 1690.35413   | 229.37971    | 48.7866 |
| 5      | 19.179        | FM   | 0.1320      | 328.81210    | 41.50126     | 9.4901  |

Totals : 3464.79388 522.57530

Reverse-phase HPLC profile for **ON19**.

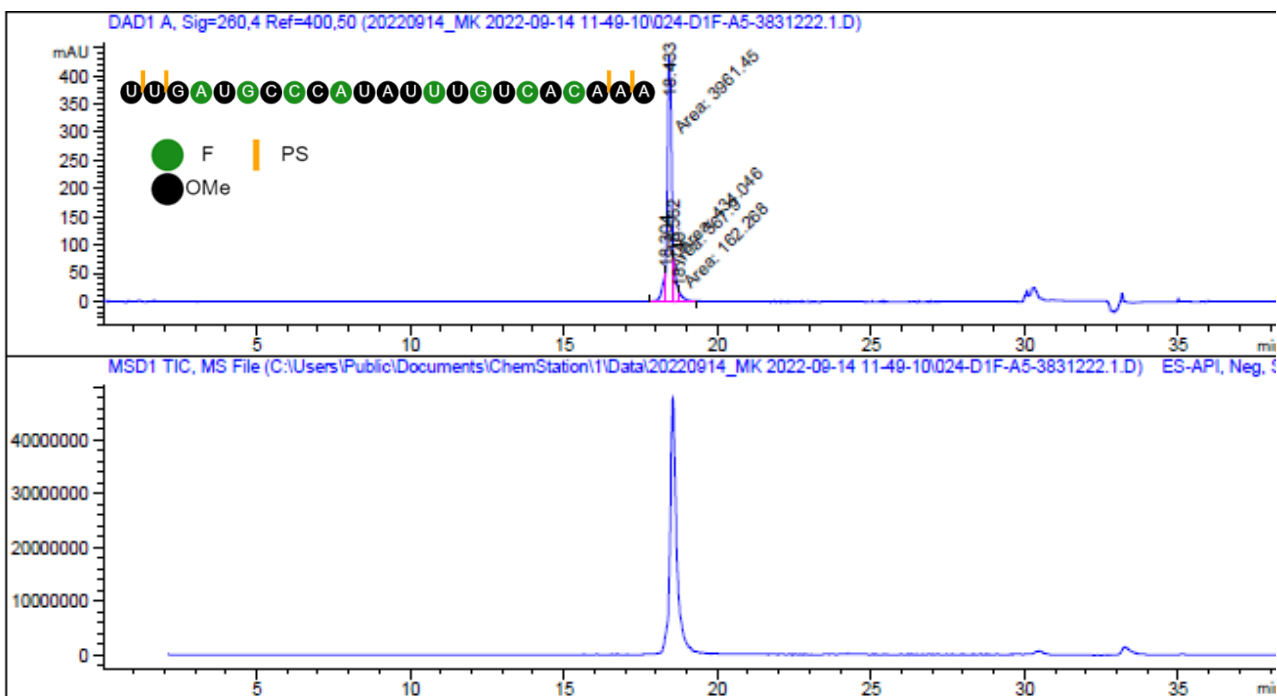

=====  
 Area Percent Report  
 =====

Sorted By : Signal  
 Multiplier : 1.0000  
 Dilution : 1.0000  
 Do not use Multiplier & Dilution Factor with ISTDs

Signal 1: DAD1 A, Sig=260,4 Ref=400,50

| Peak # | RetTime [min] | Type | Width [min] | Area [mAU*s] | Height [mAU] | Area %  |
|--------|---------------|------|-------------|--------------|--------------|---------|
| 1      | 18.304        | MF   | 0.1203      | 367.90045    | 50.97963     | 7.4691  |
| 2      | 18.433        | MF   | 0.1514      | 3961.44849   | 436.09494    | 80.4247 |
| 3      | 18.562        | MF   | 0.0744      | 434.04633    | 80.59775     | 8.8119  |
| 4      | 18.740        | FM   | 0.1454      | 162.26782    | 18.60048     | 3.2943  |

Reverse-phase HPLC profile for ON20.

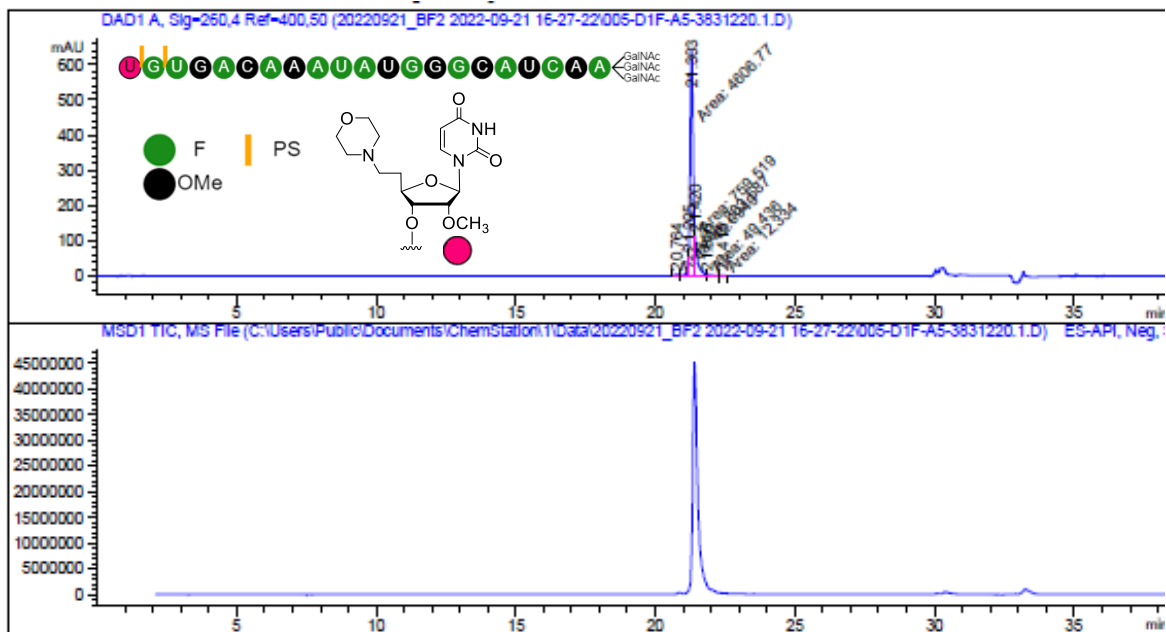

=====  
 Area Percent Report  
 =====

Sorted By : Signal  
 Multiplier : 1.0000  
 Dilution : 1.0000  
 Do not use Multiplier & Dilution Factor with ISTDs

Signal 1: DAD1 A, Sig=260,4 Ref=400,50

| Peak # | RetTime [min] | Type | Width [min] | Area [mAU*s] | Height [mAU] | Area %  |
|--------|---------------|------|-------------|--------------|--------------|---------|
| 1      | 20.764        | MF   | 0.1403      | 42.09488     | 4.99930      | 0.7419  |
| 2      | 21.205        | MF   | 0.0595      | 203.58710    | 57.04085     | 3.5882  |
| 3      | 21.303        | MF   | 0.1198      | 4606.76953   | 640.96368    | 81.1946 |
| 4      | 21.420        | FM   | 0.1095      | 759.51910    | 115.64349    | 13.3866 |

Data File C:\Users\Public\Documents\ChemStation\1\Data\20220921\_BF2 2022-09-21 16-27-22\005-D1F-A5-3831220.1.D  
 Sample Name: 3831220.1

| Peak # | RetTime [min] | Type | Width [min] | Area [mAU*s] | Height [mAU] | Area % |
|--------|---------------|------|-------------|--------------|--------------|--------|
| 5      | 21.856        | FM   | 0.1994      | 49.43597     | 4.13282      | 0.8713 |
| 6      | 22.415        | FM   | 0.1486      | 12.32401     | 1.38323      | 0.2174 |

Reverse-phase HPLC profile for ON21.

### **Treatment of mice and analysis of *ApoB***

All studies were conducted using protocols consistent with local, state, and federal regulations, as applicable, and were approved by the Institutional Animal Care and Use Committee (IACUC) at Alnylam Pharmaceuticals. Female C57BL/6 mice (Charles River Laboratories) of 6 -8 weeks old used. Mice were treated with test article via subcutaneous injection. There were three mice per group. siRNA was given at a dose of 3 mg/kg on day 0. Plasma samples were collected in EDTA collection tube at days 0 (pre-dose), 7, 14, and 21. Apo-B protein levels were determined using the Mouse ApoB SimpleStep ELISA® Kit (Abcam; catalog number ab230932) in accordance with the manufacturer's protocol, and data were normalized to pre-bleed ApoB levels in each individual mouse.

### **On- and off-target activity determination in luciferase reporter assay<sup>7</sup>**

COS-7 cells were cultured at 37 °C, 5% CO<sub>2</sub> in Dulbecco's Modified Eagle Medium supplemented with 10% fetal bovine serum. Cells, in 96-well plates (15,000 cells/well), were co-transfected with 10 ng luciferase reporter plasmid and 0.64 pM to 50 nM siRNA in 5-fold dilutions using 2 µL Lipofectamine 2000 (Thermo Fisher Scientific) according to the manufacturer's instructions. Cells were harvested at 48 hours after transfection for the dual luciferase assay (Promega) according to manufacturer's instructions. The on-target reporter plasmid contained a single site perfectly complementary to the antisense strand in the 3' UTR of *Renilla* luciferase. The off-target reporter plasmid contained four tandem seed-complementary sites separated by a 19-nucleotide spacer (TAATATTACATAAATAAAA) in the 3' UTR of *Renilla* luciferase. Both plasmids co-expressed firefly luciferase as a transfection control.

**Table S3.** siRNA activities in luciferase reporter assay

| Duplex ID | Sense strand (upper) and antisense strand (lower) <sup>a</sup> (5'-3') | IC <sub>50</sub> (nM) | IC <sub>50</sub> fold change relative to parent |
|-----------|------------------------------------------------------------------------|-----------------------|-------------------------------------------------|
| Parent    | a●a●caguGuUCUugcucuauaaL<br>u●U●uaaGagcaagaAcAcuguu●u●u                | 0.0075                | 1.0                                             |
| IX        | a●a●caguGuUCUugcucuauaaL<br>Mo1●U●uaaGagcaagaAcAcuguu●u●u              | 0.0961                | 13                                              |
| X         | a●a●caguGuUCUugcucuauaaL<br>Mo2●U●uaaGagcaagaAcAcuguu●u●u              | 0.2216                | 30                                              |
| XI        | a●a●caguGuUCUugcucuauaaL<br>Pip●U●uaaGagcaagaAcAcuguu●u●u              | 0.0102                | 1.4                                             |
| XII       | a●a●caguGuUCUugcucuauaaL<br>Mo3●U●uaaGagcaagaAcAcuguu●u●u              | 0.0107                | 1.4                                             |
| XIII      | a●a●caguGuUCUugcucuauaaL<br>Mo2●u●uaaGagcaagaAcAcuguu●u●u              | NA                    | NA                                              |

<sup>a</sup> Chemical modifications are indicated as follows: ●, PS linkage; lower case, 2'-OMe; upper case, 2'-F; L, trivalent-GalNAc.

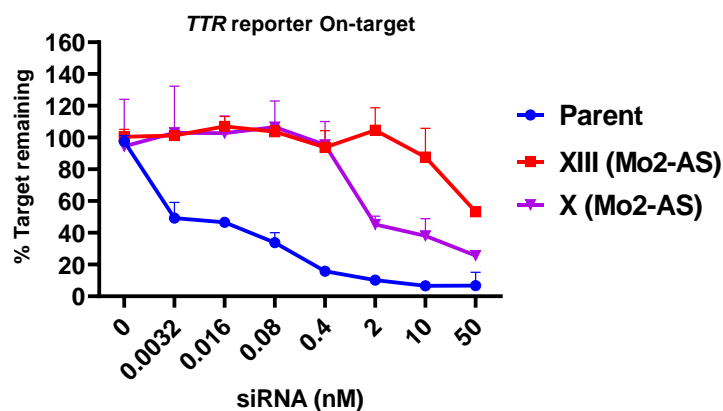

**Figure S3:** Gene silencing activity is inhibited by **Mo2** modification of the antisense strand. Percent luciferase expression in reporter assay as a function of siRNA concentration.

### *In vitro* ApoB assay

To evaluate modified siRNA silencing activity *in vitro*, oligonucleotides were transfected into primary mouse hepatocytes. Cells were seeded in collagen-coated 96-well plates (50,000 cells/well) and transfected with 0.64 pM to 10 nM siRNA in 5-fold dilutions using 0.3  $\mu$ l/well Lipofectamine RNAiMax reagent (Thermo Fisher Scientific) according to the manufacturer's instructions. Cells were harvested at 48 h after transfection, and RNA was extracted, and ApoB mRNA was quantified by RT-PCR.

**Table S4:** *In vitro* silencing activity of siRNAs targeting *ApoB*.

| Duplex ID | Sense strand (upper) and antisense strand (lower) <sup>a</sup> (5'-3') | IC <sub>50</sub> (nM) | max repression (%) |
|-----------|------------------------------------------------------------------------|-----------------------|--------------------|
| Parent    | u●g●UgAcAaAUuGgGcAuCaAL<br>u●U●gAuGcCcAuauUuGuCaCa●a●a                 | 0.244                 | 84.0               |
| III       | Mo2●g●UgAcAaAUuGgGcAuCaAL<br>u●U●gAuGcCcAuauUuGuCaCa●a●a               | 0.135                 | 85.0               |
| VI        | u●g●UgAcAaAUuGgGcAuCaAL<br>Mo2●U●gAuGcCcAuauUuGuCaCa●a●a               | -                     | 0.2                |
| XIV       | Mo2●G●UgAcAaAUuGgGcAuCaAL<br>u●U●gAuGcCcAuauUuGuCaCa●a●a               | 0.023                 | 88.0               |
| XV        | u●g●UgAcAaAUuGgGcAuCaAL<br>Mo2●u●gAuGcCcAuauUuGuCaCa●a●a               | -                     | 3.7                |

<sup>a</sup> Chemical modifications are indicated as follows: ●, PS linkage; lower case, 2'-OMe; upper case, 2'-F; L, trivalent-GalNAc.

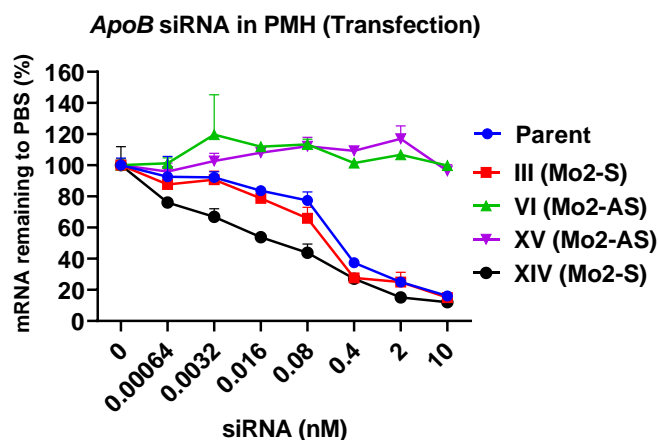

**Figure S4:** 5'-Mo2 coupled with 2'-fluoro at position 2 of the antisense strand inhibits activity at the highest concentration tested. Percent *ApoB* mRNA remaining in cells transfected with indicated siRNA.



**Table S5. Details regarding Oligonucleotides shown in Figure 5.**

| <b>TTR AS strand (5'-3')<sup>a</sup></b>             | <b>5'-end modification</b>                                                                                          | <b>Remarks</b>                                                                                                  |
|------------------------------------------------------|---------------------------------------------------------------------------------------------------------------------|-----------------------------------------------------------------------------------------------------------------|
| <b>ON11</b><br><b>u•U•</b> uaaGagcaagaAcAcuguu•u•u   | <b>-OH</b><br>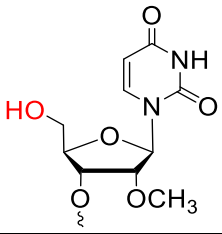                    | Poor loading.<br>Inefficient phosphorylation due to chemical modification or de-phosphorylation by phosphatases |
| <b>ON12</b><br><b>VPu•U•</b> uaaGagcaagaAcAcuguu•u•u | <b>VP (Vinyl phosphonate)</b><br> | Efficient MID domain loading                                                                                    |
| <b>ON13</b><br><b>Mo1•U•</b> uaaGagcaagaAcAcuguu•u•u | <b>Mo1</b><br>                   | Inhibitor of loading                                                                                            |
| <b>ON14</b><br><b>Mo2•U•</b> uaaGagcaagaAcAcuguu•u•u | <b>Mo2</b><br>                  | Most efficient inhibitor of loading                                                                             |

<sup>a</sup>Chemical modifications are indicated as follows: •, PS linkage; lower case, 2'-OMe; and upper case, 2'-F; respectively.

### ***In vitro* Ago2 binding assay**

Anti-FLAG M2 antibody (2.5 µg) was incubated with 20 µl of Dynabeads® Protein G (Life Technologies) in PBS supplemented with 0.02% Tween-20. After washing in fresh buffer, 4 µg of N-terminal FLAG-tagged recombinant human Ago2 (Active Motif, catalog number 31486) was incubated for 10 min at room temperature with gentle rotation, and unbound protein was removed by washing in PBS. Beads were resuspended in Ago2 binding and wash buffer (150 mM NaCl, 20 mM Tris pH 8.0, 2 mM MgCl<sub>2</sub>, 0.5 mM TCEP). Antisense strands of siRNAs were added to Ago2 protein immobilized on Dynabeads to a final concentration of 0.05 µg in 40 µl final volume and allowed to incubate for 1 h at 37° C. After washing beads three times in 1 ml PBS with 0.25% Triton X-100, RNA was quantified using stem-loop RT-qPCR as previously described.<sup>8</sup>

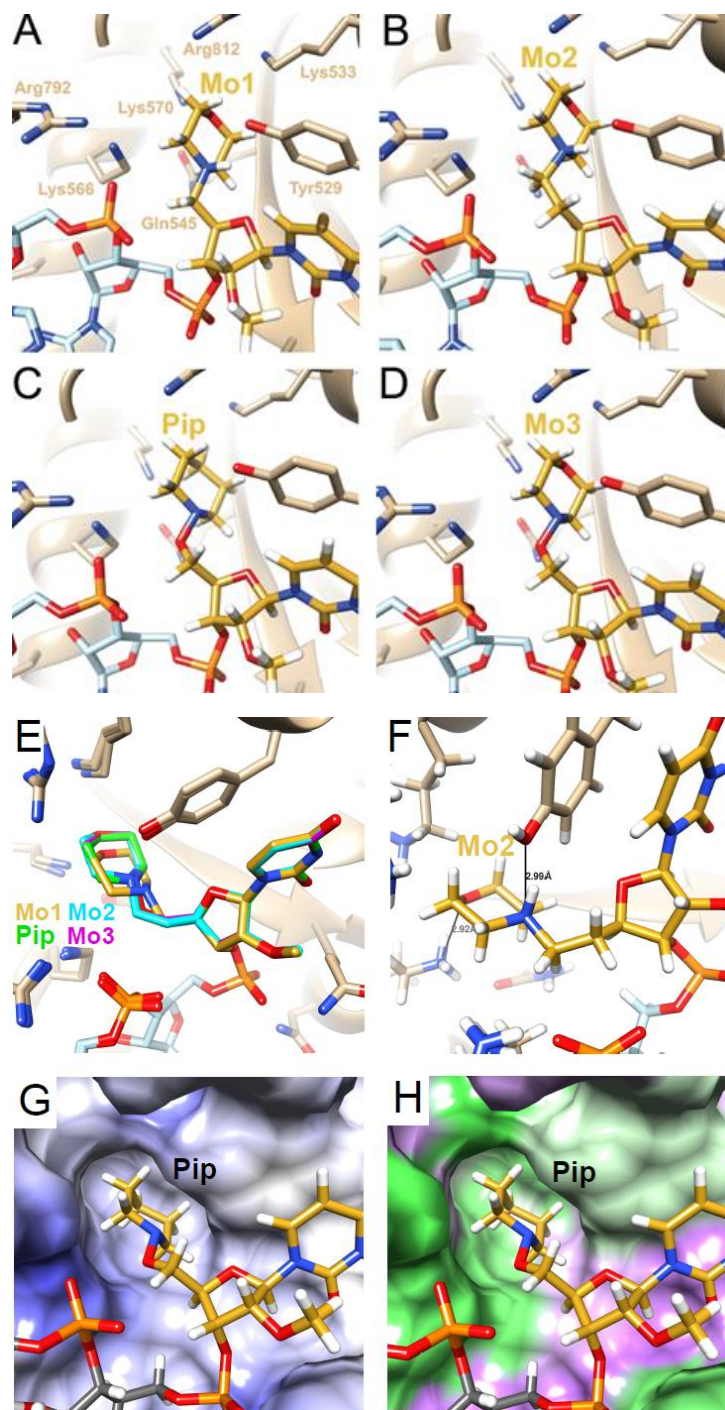

**Figure S5.** Morpholino analogues disrupt interaction of the 5'-phosphate with the MID domain of Ago2. Models of Ago2 bound to strands with (A) **Mo1**, (B) **Mo2**, (C) **Pip**, and (D) **Mo3**. (E) Overlay of the complexes shown in panels A-D. (F) Potential hydrogen-bond formation with **Mo2**. (G) Ago2 surface colored according to Coulombic potential (blue positive, white neutral). (H) Ago2 surface colored according to hydrophobicity (green lowest and pink highest).

## References:

1. M. J. Fer, P. Doan, T. Prange, S. Calvet-Vitale and C. Gravier-Pelletier, *J. Org. Chem.*, 2014, **79**, 7758-7765.
2. R. G. Parmar, C. R. Brown, S. Matsuda, J. L. S. Willoughby, C. S. Theile, K. Charisse, D. J. Foster, I. Zlatev, V. Jadhav, M. A. Maier, M. Egli, M. Manoharan and K. G. Rajeev, *J. Med. Chem.*, 2018, **61**, 734-744.
3. A. Varizhuk, A. Chizhov, I. Smirnov, D. Kaluzhny and V. Florentiev, *Eur. J. Org. Chem.*, 2012, **2012**, 2173-2179, S2173/2171-S2173/2118.
4. D. Datta, S. Mori, M. Madaoui, K. Wassarman, I. Zlatev and M. Manoharan, *Org. Lett.*, 2022, **24**, 4496-4501.
5. M. Israel and R. J. Murray, *J. Med. Chem.*, 1982, **25**, 24-28.
6. P. Kumar, R. G. Parmar, C. R. Brown, J. L. S. Willoughby, D. J. Foster, I. R. Babu, S. Schofield, V. Jadhav, K. Charisse, J. K. Nair, K. G. Rajeev, M. A. Maier, M. Egli and M. Manoharan, *Chem. Commun.*, 2019, **55**, 5139-5142.
7. D. C. Guenther, S. Mori, S. Matsuda, J. A. Gilbert, J. L. S. Willoughby, S. Hyde, A. Bisbe, Y. Jiang, S. Agarwal, M. Madaoui, M. M. Janas, K. Charisse, M. A. Maier, M. Egli and M. Manoharan, *J. Am. Chem. Soc.*, 2022, **144**, 14517-14534.
8. C. Chen, D. A. Ridzon, A. J. Broomer, Z. Zhou, D. H. Lee, J. T. Nguyen, M. Barbisin, N. L. Xu, V. R. Mahuvakar, M. R. Andersen, K. Q. Lao, K. J. Livak and K. J. Guegler, *Nucleic Acids Res.*, 2005, **33**, e179-e179.
